# Supplementary material for: A noble nexus: a phosphino-phen ligand for tethering precious metals
Source: Royal Society of Chemistry journal article supplement (doi:10.1039/d4dt02130d), 2024-01-01
Supplement: d4dt02130d1.pdf [file d4dt02130d1.pdf]

## Supplementary material.

# A Noble Nexus: A Phosphino-Phen Ligand for Tethering Precious Metals

Paul D. Newman,<sup>\*a</sup> James A. Platts,<sup>a</sup> Basheer Alrashidi,<sup>a</sup> Simon J. A. Pope<sup>a</sup> and Benson M.

Kariuki<sup>a</sup>

<sup>†</sup>School of Chemistry, Cardiff University, Cardiff, Wales, UK, CF10 3AT.

## Contents

|                                                                            |    |
|----------------------------------------------------------------------------|----|
| Figure S1. <sup>31</sup> P{ <sup>1</sup> H} NMR spectrum of <b>L1</b> .    | 6  |
| Figure S2. <sup>1</sup> H NMR spectrum of <b>L1</b> .                      | 7  |
| Figure S3. <sup>13</sup> C{ <sup>1</sup> H} NMR spectrum of <b>L1</b> .    | 7  |
| Figure S4. COSY NMR spectrum of <b>L1</b> .                                | 8  |
| Figure S5. HSQC NMR spectrum of <b>L1</b> .                                | 8  |
| Figure S6. NOESY NMR spectrum of <b>L1</b> .                               | 9  |
| Figure S7. HRMS (ES <sup>+</sup> ) spectrum of <b>L1</b> .                 | 10 |
| Figure S8. <sup>31</sup> P{ <sup>1</sup> H} NMR spectrum of <b>L2</b> .    | 10 |
| Figure S9. <sup>1</sup> H NMR spectrum of <b>L2</b> .                      | 10 |
| Figure S10. <sup>13</sup> C{ <sup>1</sup> H} NMR spectrum of <b>L2</b> .   | 11 |
| Figure S11. COSY NMR spectrum of <b>L2</b> .                               | 12 |
| Figure S12. HSQC NMR spectrum of <b>L2</b> .                               | 12 |
| Figure S13. NOESY NMR spectrum of <b>L2</b> .                              | 13 |
| Figure S14. HRMS (ES <sup>+</sup> ) spectrum of <b>L2</b> .                | 13 |
| Figure S15. <sup>31</sup> P{ <sup>1</sup> H} NMR spectrum of <b>RuL1</b> . | 14 |
| Figure S16. <sup>1</sup> H NMR spectrum of <b>RuL1</b> .                   | 14 |
| Figure S17. COSY NMR spectrum of <b>RuL1</b> .                             | 15 |
| Figure S18. HSQC NMR spectrum of <b>RuL1</b> .                             | 15 |

|                                                                              |    |
|------------------------------------------------------------------------------|----|
| Figure S19. NOESY NMR spectrum of <b>RuL1</b> .                              | 16 |
| Figure S20. HRMS (ES <sup>+</sup> ) spectrum of <b>RuL1</b> .                | 17 |
| Figure S21. <sup>31</sup> P{ <sup>1</sup> H} NMR spectrum of <b>RuAuL1</b> . | 17 |
| Figure S22. <sup>1</sup> H NMR spectrum of <b>RuAuL1</b> .                   | 18 |
| Figure S23. <sup>13</sup> C{ <sup>1</sup> H} NMR spectrum of <b>RuAuL1</b> . | 19 |
| Figure S24. COSY NMR spectrum of <b>RuAuL1</b> .                             | 19 |
| Figure S25. HSQC NMR spectrum of <b>RuAuL1</b> .                             | 20 |
| Figure S26. NOESY NMR spectrum of <b>RuAuL1</b> .                            | 20 |
| Figure S27. HRMS (ES <sup>+</sup> ) spectrum of <b>RuAuL1</b> .              | 21 |
| Figure S28. <sup>31</sup> P{ <sup>1</sup> H} NMR spectrum of <b>ReL1</b> .   | 21 |
| Figure S29. <sup>1</sup> H NMR spectrum of <b>ReL1</b> .                     | 22 |
| Figure S30. <sup>13</sup> C{ <sup>1</sup> H} NMR spectrum of <b>ReL1</b> .   | 23 |
| Figure S31. COSY NMR spectrum of <b>ReL1</b> .                               | 23 |
| Figure S32. HSQC NMR spectrum of <b>ReL1</b> .                               | 24 |
| Figure S33. NOESY NMR spectrum of <b>ReL1</b> .                              | 24 |
| Figure S34. HRMS (ES <sup>+</sup> ) spectrum of <b>ReL1</b> .                | 25 |
| Figure S35. <sup>31</sup> P{ <sup>1</sup> H} NMR spectrum of <b>2ReL1</b> .  | 26 |
| Figure S36. <sup>1</sup> H NMR spectrum of <b>2ReL1</b> .                    | 26 |
| Figure S37. COSY NMR spectrum of <b>2ReL1</b> .                              | 26 |
| Figure S38. HSQC NMR spectrum of <b>2ReL1</b> .                              | 27 |
| Figure S39. HRMS (ES <sup>+</sup> ) spectrum of <b>2ReL1</b> .               | 27 |
| Figure S40. <sup>31</sup> P{ <sup>1</sup> H} NMR spectrum of <b>ReAuL1</b> . | 28 |
| Figure S41. <sup>1</sup> H NMR spectrum of <b>ReAuL1</b> .                   | 28 |
| Figure S42. <sup>13</sup> C{ <sup>1</sup> H} NMR spectrum of <b>ReAuL1</b> . | 29 |
| Figure S43. COSY NMR spectrum of <b>ReAuL1</b> .                             | 29 |
| Figure S44. HSQC NMR spectrum of <b>ReAuL1</b> .                             | 30 |
| Figure S45. NOESY NMR spectrum of <b>ReAuL1</b> .                            | 30 |

|                                                                              |    |
|------------------------------------------------------------------------------|----|
| Figure S46. HRMS (ES <sup>+</sup> ) spectrum of <b>ReAuL1</b> .              | 31 |
| Figure S47. <sup>31</sup> P{ <sup>1</sup> H} NMR spectrum of <b>ReL2</b> .   | 31 |
| Figure S48. <sup>1</sup> H NMR spectrum of <b>ReL2</b> .                     | 32 |
| Figure S49. <sup>13</sup> C{ <sup>1</sup> H} NMR spectrum of <b>ReL2</b> .   | 32 |
| Figure S50. HSQC NMR spectrum of <b>ReL2</b> .                               | 33 |
| Figure S51. HRMS (ES <sup>+</sup> ) spectrum of <b>ReL2</b> .                | 33 |
| Figure S52. <sup>31</sup> P{ <sup>1</sup> H} NMR spectrum of <b>2ReL2</b> .  | 34 |
| Figure S53. <sup>1</sup> H NMR spectrum of <b>2ReL2</b> .                    | 34 |
| Figure S54. <sup>13</sup> C{ <sup>1</sup> H} NMR spectrum of <b>2ReL2</b> .  | 35 |
| Figure S55. COSY NMR spectrum of <b>2ReL2</b> .                              | 35 |
| Figure S56. HSQC NMR spectrum of <b>2ReL2</b> .                              | 36 |
| Figure S57. NOESY NMR spectrum of <b>2ReL2</b> .                             | 36 |
| Figure S58. <sup>31</sup> P{ <sup>1</sup> H} NMR spectrum of <b>ReAuL2</b> . | 37 |
| Figure S59. <sup>1</sup> H NMR spectrum of <b>ReAuL2</b> .                   | 37 |
| Figure S60. <sup>13</sup> C{ <sup>1</sup> H} NMR spectrum of <b>ReAuL2</b> . | 38 |
| Figure S61. COSY NMR spectrum of <b>ReAuL2</b> .                             | 38 |
| Figure S62. HSQC NMR spectrum of <b>ReAuL2</b> .                             | 39 |
| Figure S63. NOESY NMR spectrum of <b>ReAuL2</b> .                            | 39 |
| Figure S64. HRMS (ES <sup>+</sup> ) spectrum of <b>ReAuL2</b> .              | 40 |
| Figure S65. <sup>31</sup> P{ <sup>1</sup> H} NMR spectrum of <b>AuL1</b> .   | 40 |
| Figure S66. <sup>1</sup> H NMR spectrum of <b>AuL1</b> .                     | 41 |
| Figure S67. <sup>13</sup> C{ <sup>1</sup> H} NMR spectrum of <b>AuL1</b> .   | 42 |
| Figure S68. HSQC NMR spectrum of <b>AuL1</b> .                               | 42 |
| Figure S69. NOESY NMR spectrum of <b>AuL1</b> .                              | 43 |
| Figure S70. HRMS (ES <sup>+</sup> ) spectrum of <b>AuL1</b> .                | 43 |
| Figure S71. <sup>31</sup> P{ <sup>1</sup> H} NMR spectrum of <b>AuL2</b> .   | 44 |
| Figure S72. <sup>1</sup> H NMR spectrum of <b>AuL2</b> .                     | 44 |

|                                                                           |    |
|---------------------------------------------------------------------------|----|
| Figure S73. $^{13}\text{C}\{^1\text{H}\}$ NMR spectrum of <b>AuL2</b> .   | 45 |
| Figure S74. COSY NMR spectrum of <b>AuL2</b> .                            | 46 |
| Figure S75. HSQC NMR spectrum of <b>AuL2</b> .                            | 46 |
| Figure S76. NOESY NMR spectrum of <b>AuL2</b> .                           | 47 |
| Figure S77. HRMS (ES <sup>+</sup> ) spectrum of <b>AuL2</b> .             | 48 |
| Figure S78. $^{31}\text{P}\{^1\text{H}\}$ NMR spectrum of <b>IrAuL1</b> . | 48 |
| Figure S79. $^1\text{H}$ NMR spectrum of <b>IrAuL1</b> .                  | 48 |
| Figure S80. $^{13}\text{C}\{^1\text{H}\}$ NMR spectrum of <b>IrAuL1</b> . | 49 |
| Figure S81. COSY NMR spectrum of <b>IrAuL1</b> .                          | 50 |
| Figure S82. HSQC NMR spectrum of <b>IrAuL1</b> .                          | 50 |
| Figure S83. NOESY NMR spectrum of <b>IrAuL1</b> .                         | 51 |
| Figure S84. HRMS (ES <sup>+</sup> ) spectrum of <b>IrAuL1</b> .           | 51 |
| Figure S85. $^{31}\text{P}\{^1\text{H}\}$ NMR spectrum of <b>IrAuL2</b> . | 52 |
| Figure S86. $^1\text{H}$ NMR spectrum of <b>IrAuL2</b> .                  | 52 |
| Figure S87. $^{13}\text{C}\{^1\text{H}\}$ NMR spectrum of <b>IrAuL2</b> . | 53 |
| Figure S88. COSY NMR spectrum of <b>IrAuL2</b> .                          | 54 |
| Figure S89. HSQC NMR spectrum of <b>IrAuL2</b> .                          | 54 |
| Figure S90. NOESY NMR spectrum of <b>IrAuL2</b> .                         | 55 |
| Figure S91. HRMS (ES <sup>+</sup> ) spectrum of <b>IrAuL2</b> .           | 55 |
| Figure S92. $^{31}\text{P}\{^1\text{H}\}$ NMR spectrum of <b>RePtL1</b> . | 56 |
| Figure S93. $^1\text{H}$ NMR spectrum of <b>RePtL1</b> .                  | 57 |
| Figure S94. $^{13}\text{C}\{^1\text{H}\}$ NMR spectrum of <b>RePtL1</b> . | 58 |
| Figure S95. COSY NMR spectrum of <b>RePtL1</b> .                          | 58 |
| Figure S96. NOESY NMR spectrum of <b>RePtL1</b> .                         | 59 |
| Figure S97. HRMS (ES <sup>+</sup> ) spectrum of <b>RePtL1</b> .           | 59 |
| Figure S98. $^{31}\text{P}\{^1\text{H}\}$ NMR spectrum of <b>RePdL1</b> . | 60 |
| Figure S99. $^1\text{H}$ NMR spectrum of <b>RePdL1</b> .                  | 60 |



|                                                                                     |    |
|-------------------------------------------------------------------------------------|----|
| Figure S100. COSY NMR spectrum of <b>RePdL1</b> .                                   | 61 |
| Figure S101. NOESY NMR spectrum of <b>RePdL1</b> .                                  | 61 |
| Figure S102. HRMS (ES <sup>+</sup> ) spectrum of <b>RePdL1</b> .                    | 62 |
| Figure S103. <sup>31</sup> P{ <sup>1</sup> H} NMR spectrum of <b>IrPtL1</b> .       | 62 |
| Figure S104. <sup>1</sup> H NMR spectrum of <b>IrPtL1</b> .                         | 63 |
| Figure S105. COSY NMR spectrum of <b>IrPtL1</b> .                                   | 63 |
| Figure S106. HSQC NMR spectrum of <b>IrPtL1</b> .                                   | 64 |
| Figure S107. HRMS (ES <sup>+</sup> ) spectrum of <b>IrPtL1</b> .                    | 64 |
| Figure S108. <sup>31</sup> P{ <sup>1</sup> H} NMR spectrum of <b>IrPdL1</b> .       | 65 |
| Figure S109. <sup>1</sup> H NMR spectrum of <b>IrPdL1</b> .                         | 65 |
| Figure S110. COSY NMR spectrum of <b>IrPdL1</b> .                                   | 66 |
| Figure S111. HSQC NMR spectrum of <b>IrPdL1</b> .                                   | 66 |
| Figure S112. NOESY NMR spectrum of <b>IrPdL1</b> .                                  | 67 |
| Figure S113. HRMS (ES <sup>+</sup> ) spectrum of <b>IrPdL1</b> .                    | 67 |
| Table S1. Selected <sup>1</sup> H NMR assignments                                   | 68 |
| Figure S114. Electronic spectra of the rhenium complexes                            | 69 |
| Figure S115. Electronic spectra of the ligands, ruthenium and iridium complexes     | 69 |
| Figure S116. Electronic spectra of the palladium and platinum complexes             | 70 |
| Table S2. Crystal data and structure refinement for <b>2ReL1</b> and <b>2ReL2</b> . | 71 |
| Table S3. Crystal data and structure refinement for <b>ReAuL2</b> and <b>AuL1</b> . | 72 |
| Figure S117. Molecular structure of <b>2ReL1</b> .                                  | 73 |
| Figure S118. Molecular structure of <b>2ReL2</b> .                                  | 74 |
| Figure S119. Molecular structure of <b>ReAuL2</b> .                                 | 74 |
| Figure S120. Molecular structure of <b>AuL1</b> .                                   | 75 |
| Figure S121. Calculated MOs for <b>L1</b> and selected complexes.                   | 76 |
| Figure S122. Calculated absorption spectra for <b>L1</b> and selected complexes.    | 77 |

## NMR and Mass Spectra

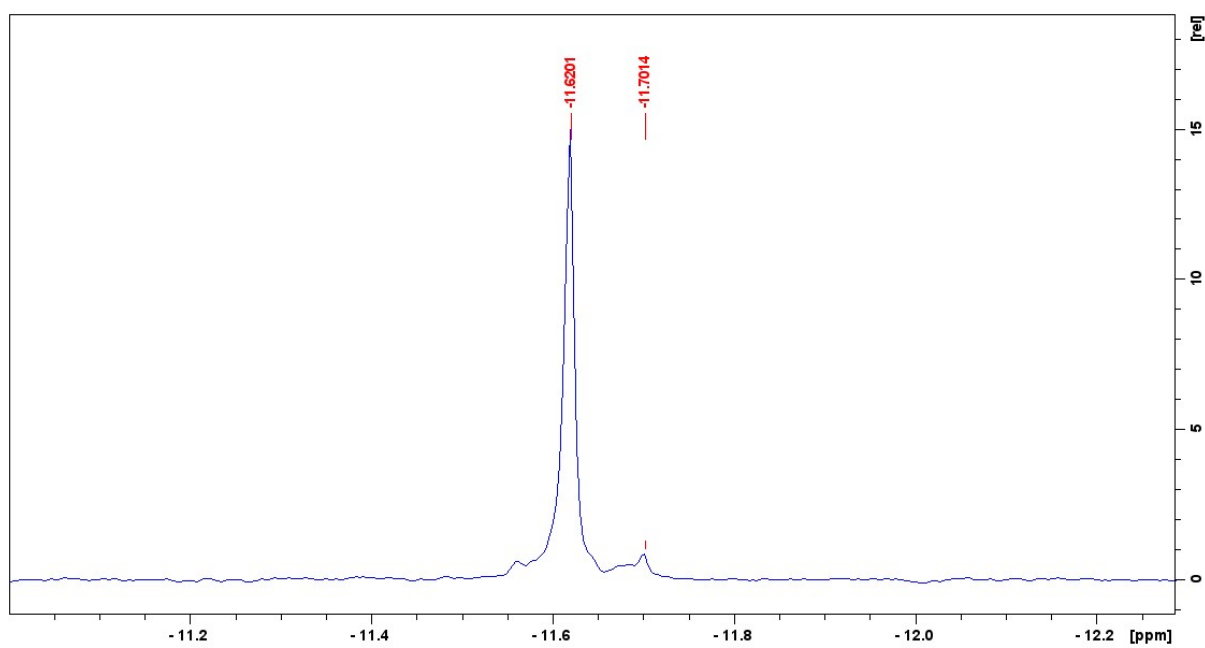

**Figure S1.**  $^{31}\text{P}\{^1\text{H}\}$  NMR spectrum of **L1** recorded at 162 MHz in  $\text{CDCl}_3$ .

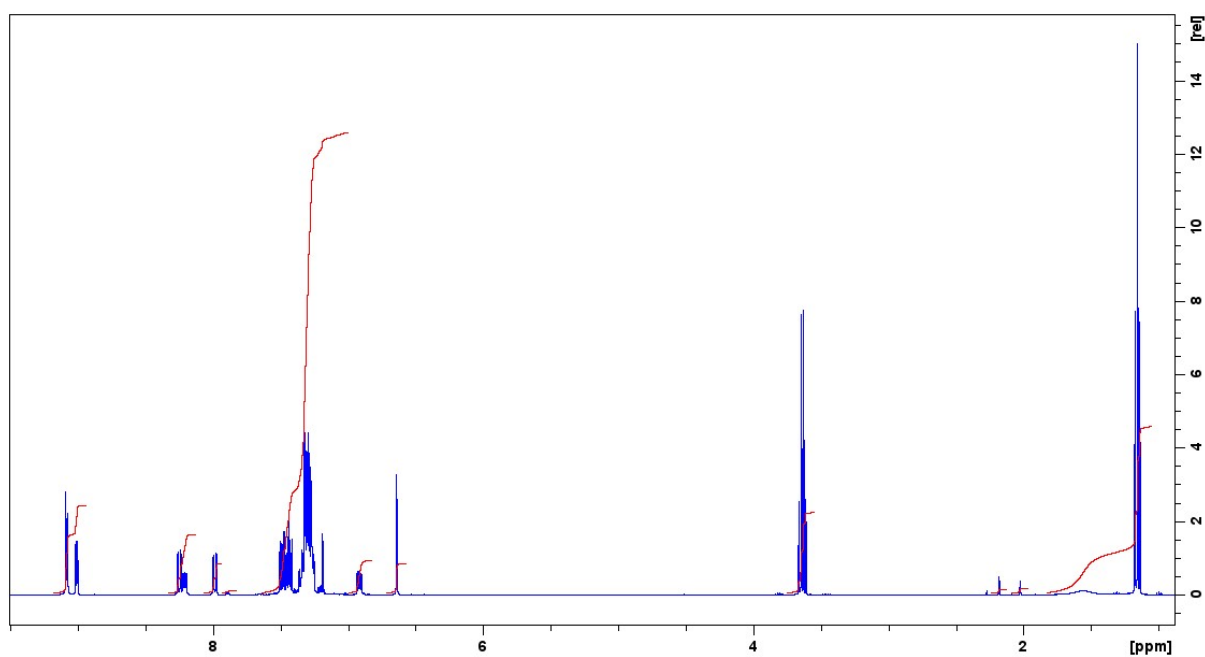

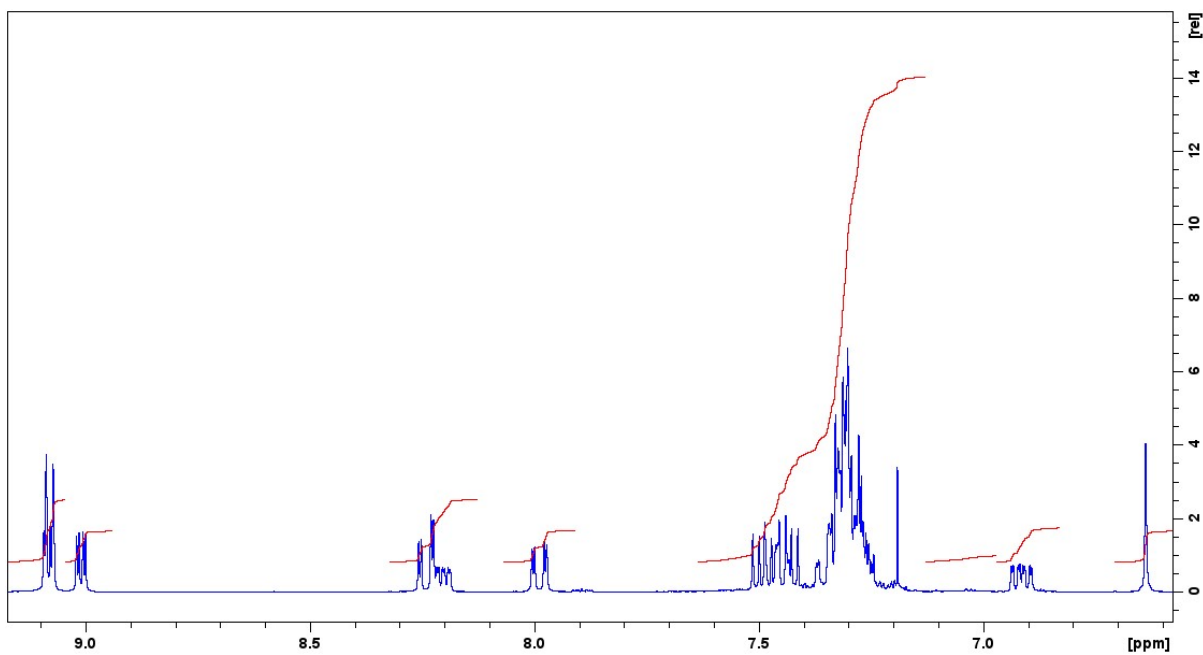

**Figure S2**  $^1\text{H}$  NMR spectra of **L1** recorded at 400 MHz in  $\text{CDCl}_3$ .

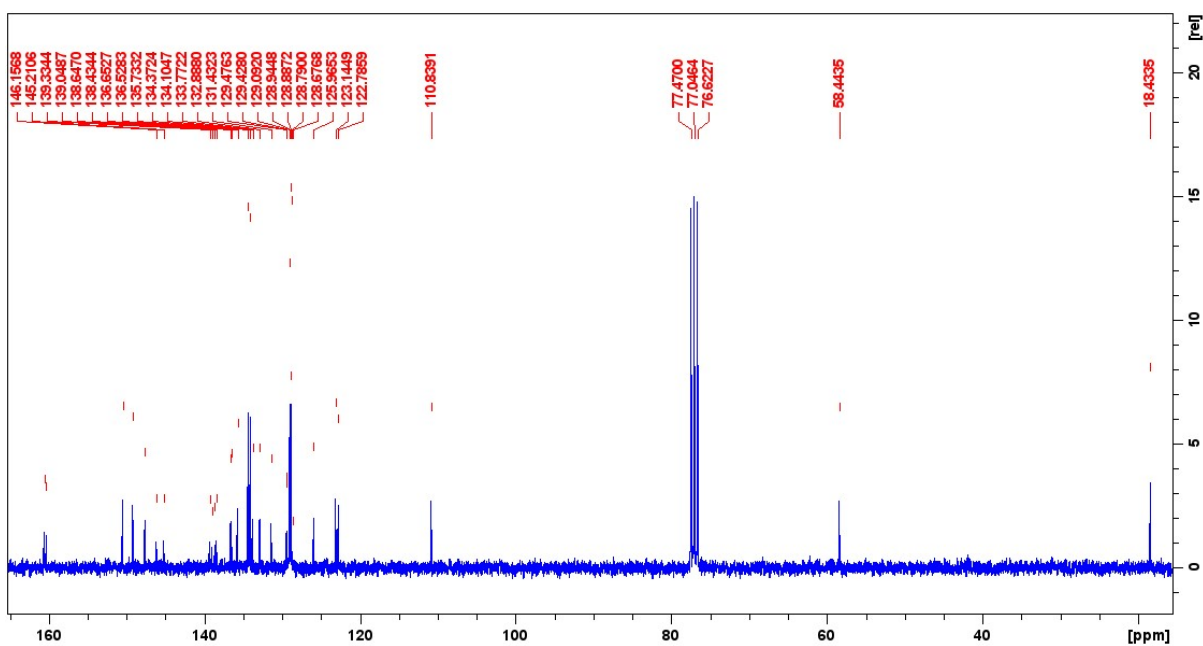

**Figure S3.**  $^{13}\text{C}\{^1\text{H}\}$  NMR spectrum of **L1** recorded at 75 MHz in  $\text{CDCl}_3$ .

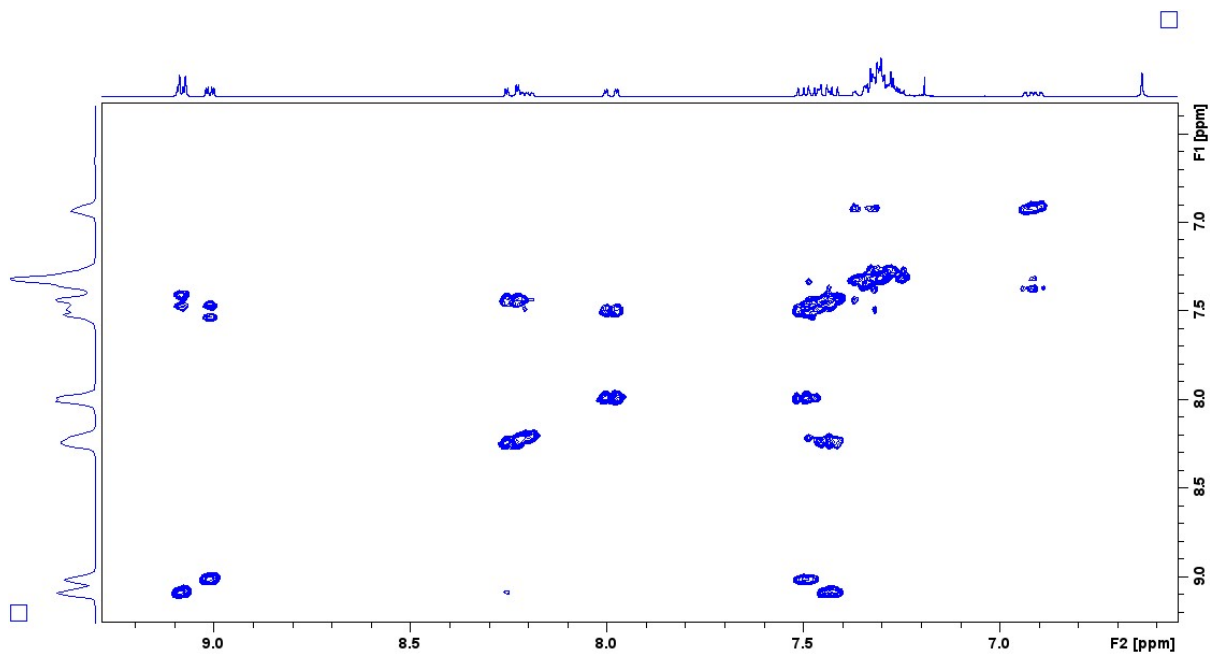

**Figure S4.**  $^1\text{H}$ - $^1\text{H}$  COSY NMR spectrum of **L1** recorded at 400 MHz in  $\text{CDCl}_3$ .

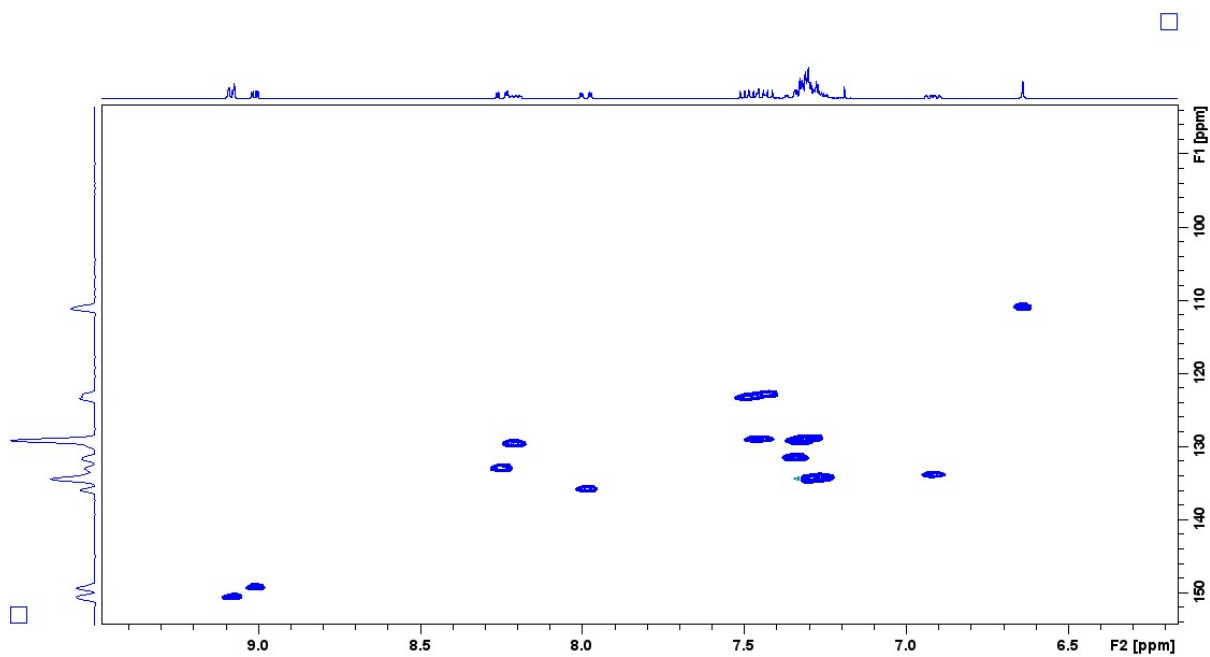

**Figure S5.**  $^1\text{H}$ - $^{13}\text{C}$  HSQC NMR spectrum of **L1** recorded in  $\text{CDCl}_3$ .

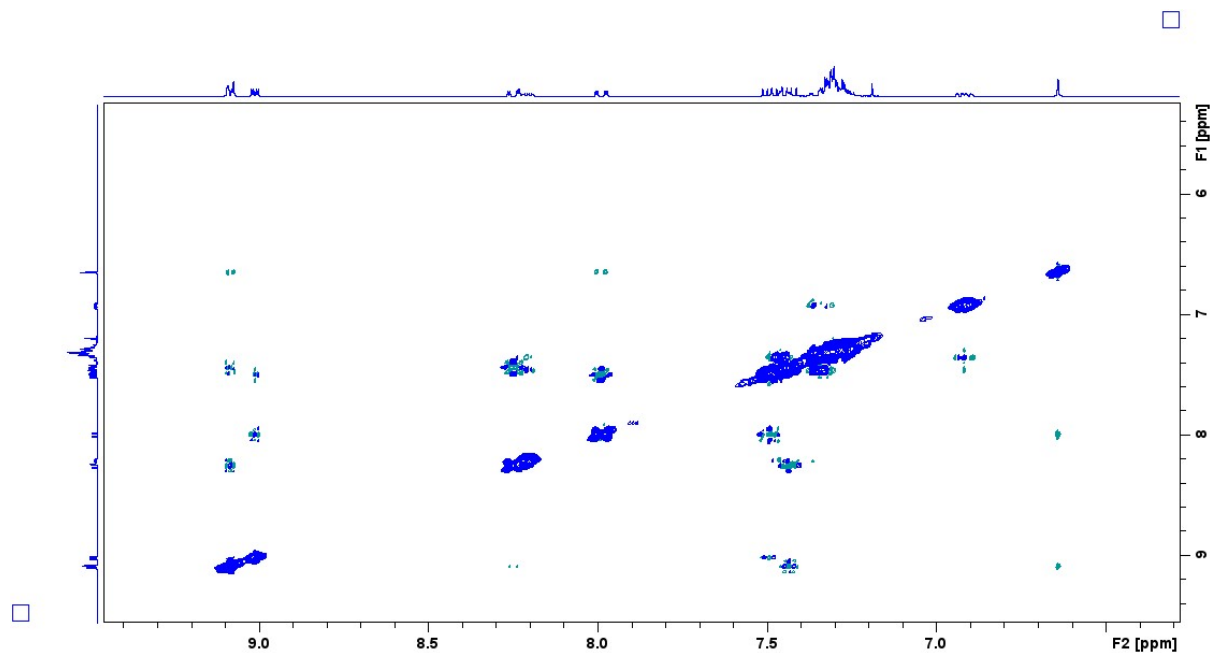

**Figure S6.**  $^1\text{H}$ - $^1\text{H}$  NOESY NMR spectrum of **L1** recorded at 400 MHz in  $\text{CDCl}_3$ .

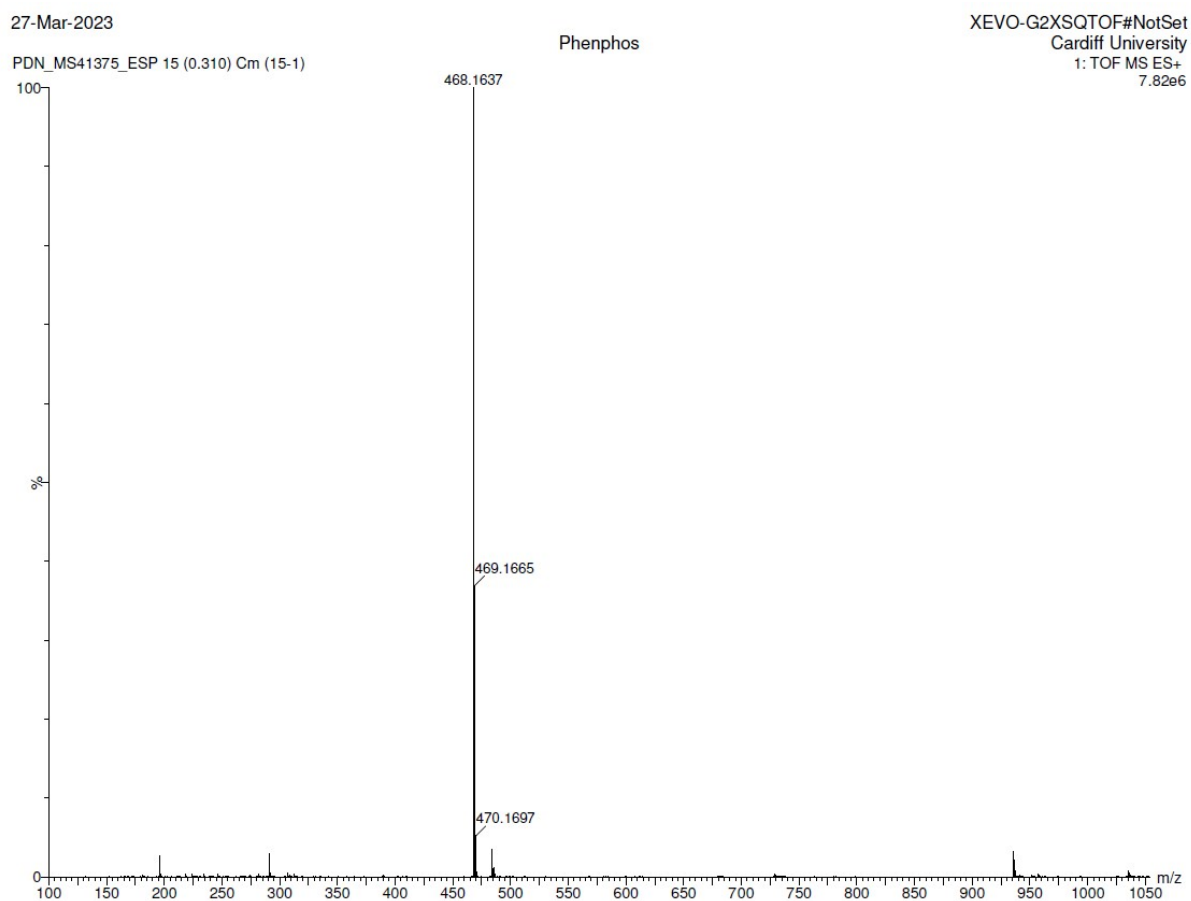

|          |            |      |     |       |       |      |          |              |  |
|----------|------------|------|-----|-------|-------|------|----------|--------------|--|
| Minimum: |            |      |     | -1.5  |       |      |          |              |  |
| Maximum: | 5.0        | 10.0 |     | 100.0 |       |      |          |              |  |
| Mass     | Calc. Mass | mDa  | PPM | DBE   | i-FIT | Norm | Conf (%) | Formula      |  |
| 468.1637 | 468.1630   | 0.7  | 1.5 | 22.5  | 928.4 | n/a  | n/a      | C31 H23 N3 P |  |

**Figure S7.** HRMS (ES<sup>+</sup>) spectrum of **L1**.

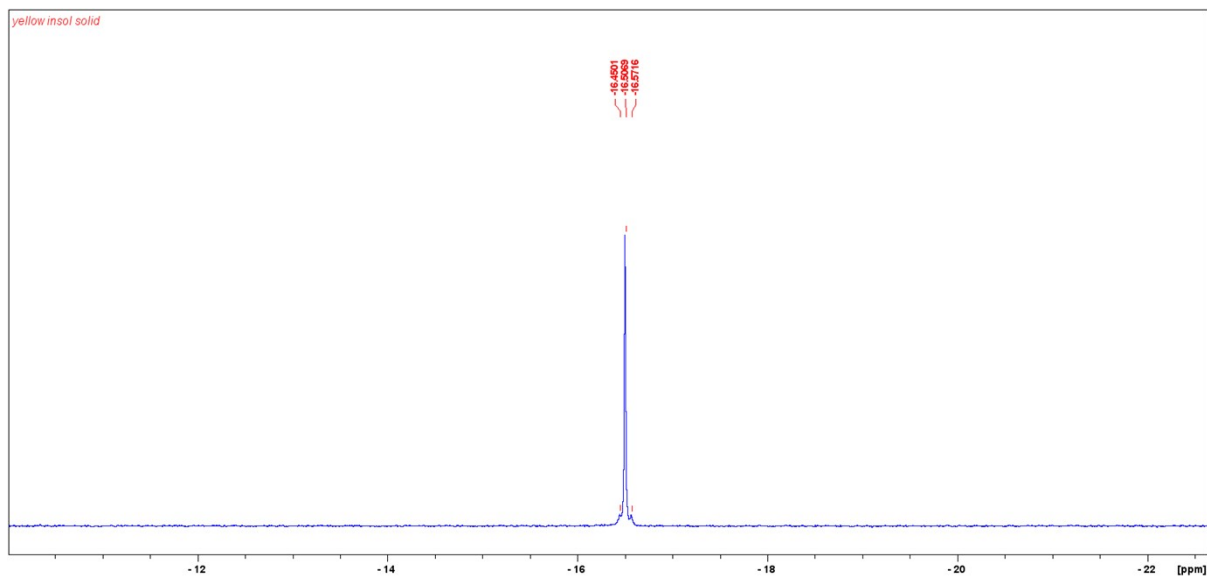

**Figure S8.** <sup>31</sup>P{<sup>1</sup>H} NMR spectrum of **L2** recorded at 162 MHz in CDCl<sub>3</sub>.

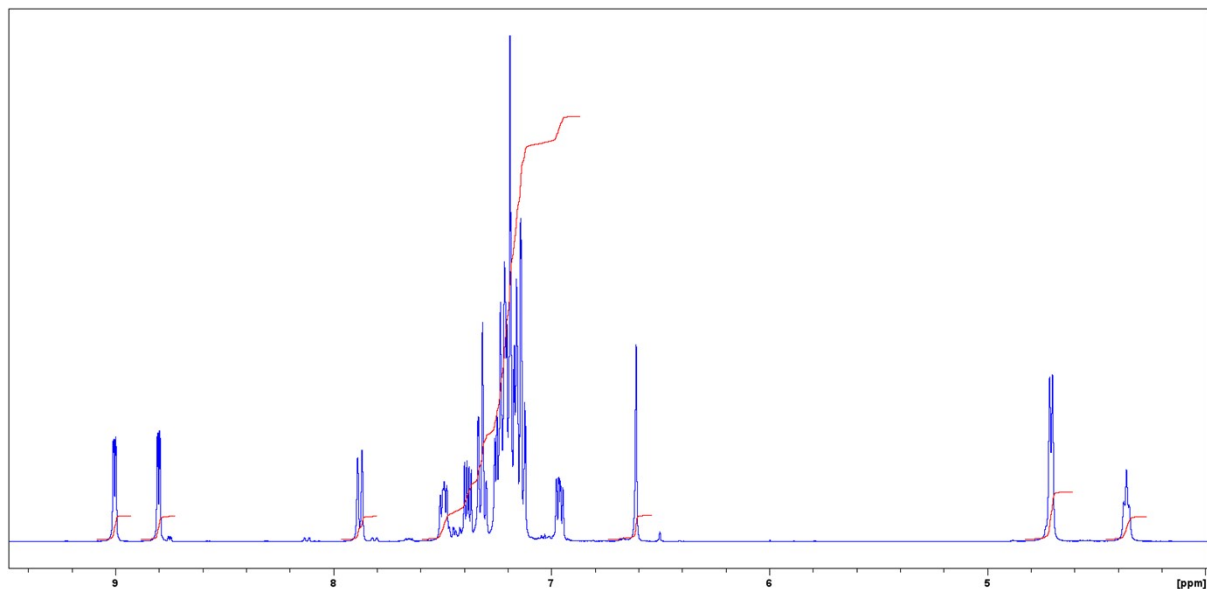

**Figure S9** <sup>1</sup>H NMR spectra of **L2** recorded at 400 MHz in CDCl<sub>3</sub>.

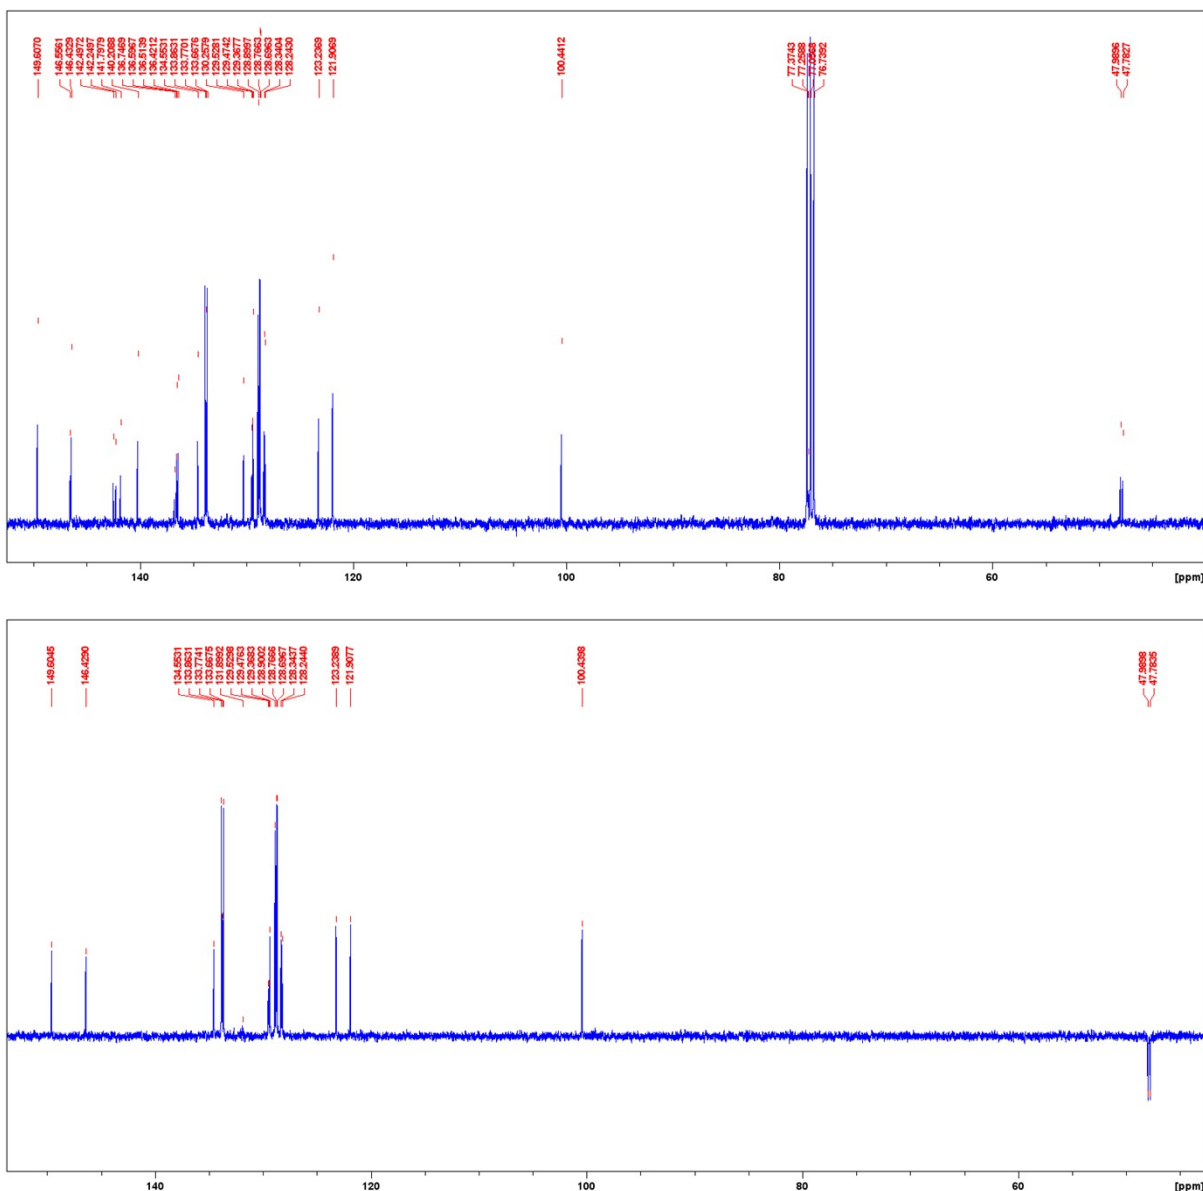

Figure S10.  $^{13}\text{C}\{^1\text{H}\}$  NMR spectra of L2 recorded at 75 MHz in  $\text{CDCl}_3$ .

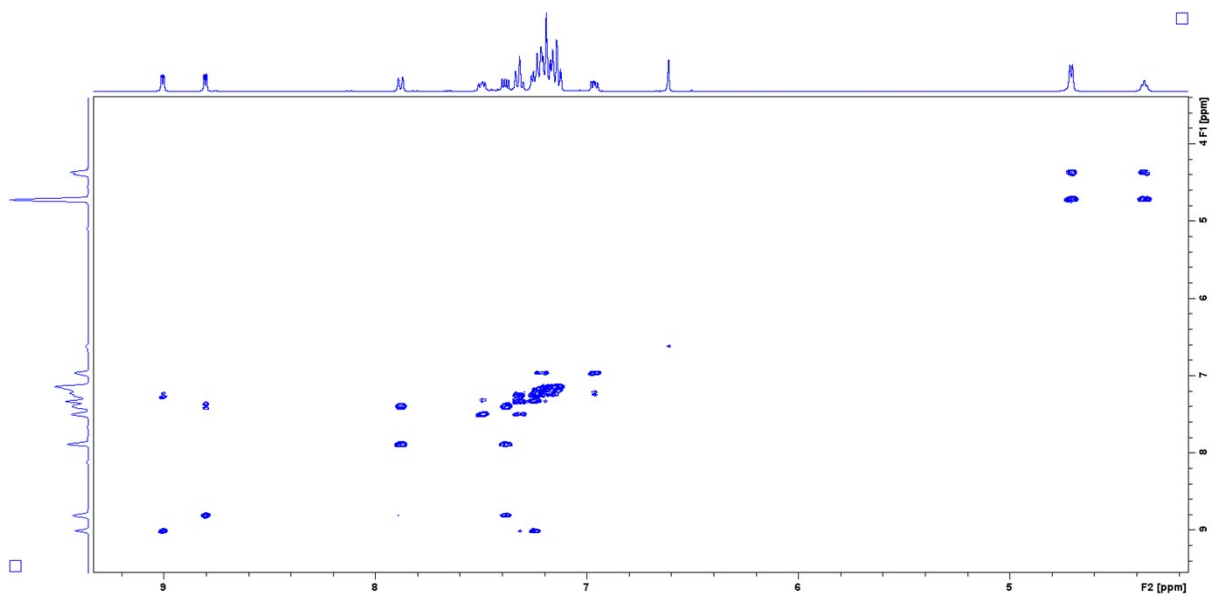

**Figure S11.**  $^1\text{H}$ - $^1\text{H}$  COSY NMR spectrum of **L2** recorded at 400 MHz in  $\text{CDCl}_3$ .

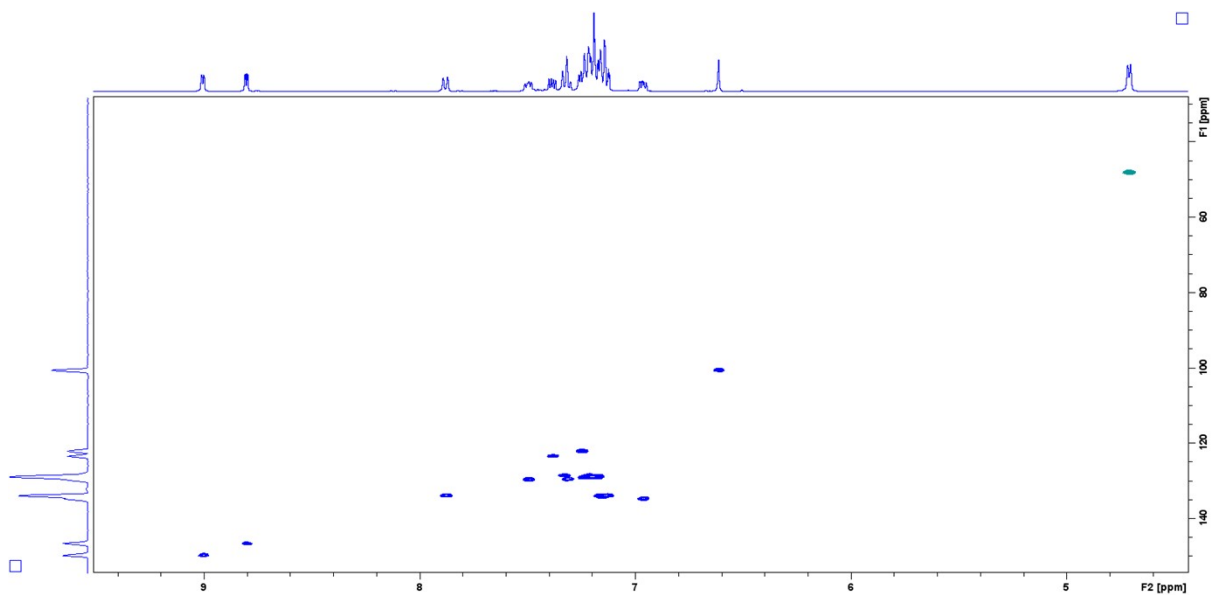

**Figure S12.**  $^1\text{H}$ - $^{13}\text{C}$  HSQC NMR spectrum of **L2** recorded in  $\text{CDCl}_3$ .



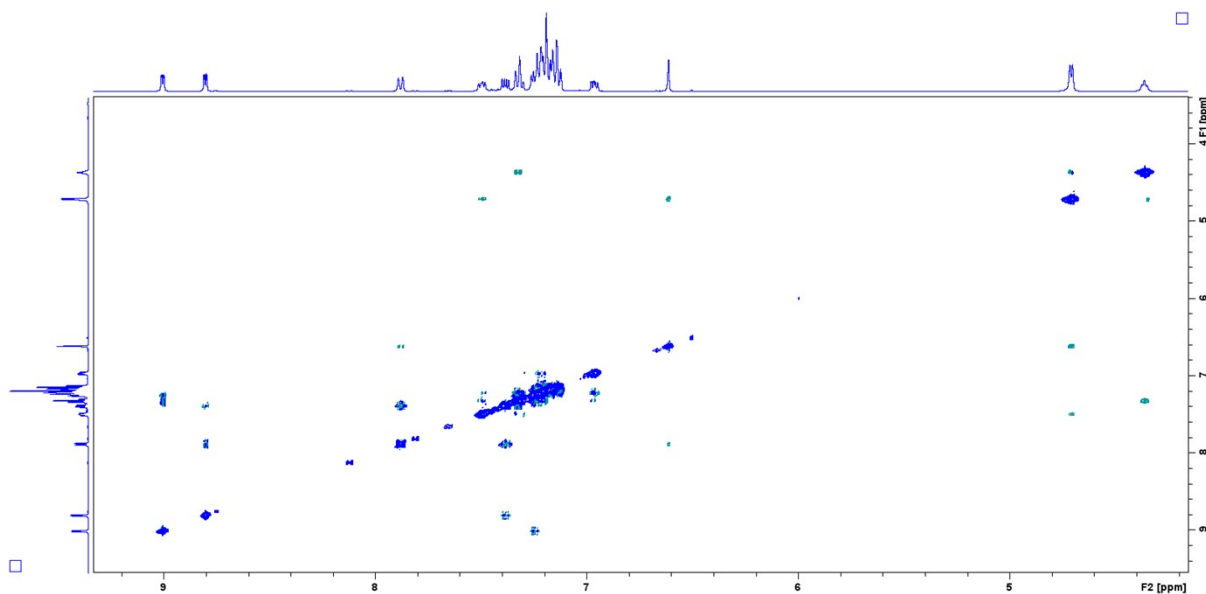

**Figure S13.**  $^1\text{H}$ - $^1\text{H}$  NOESY NMR spectrum of **L2** recorded at 400 MHz in  $\text{CDCl}_3$ .

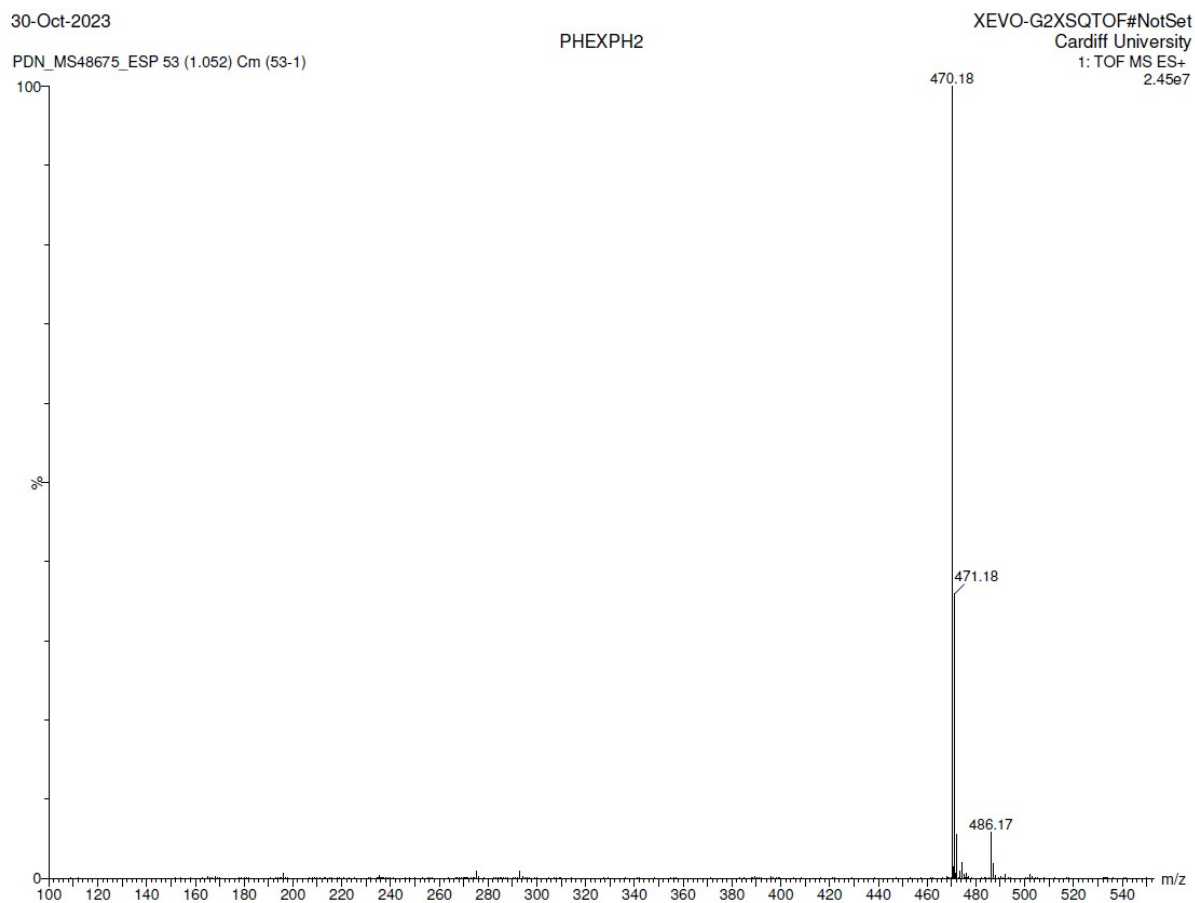

Minimum: -1.5  
 Maximum: 5.0 10.0 50.0

| Mass     | Calc. Mass | mDa | PPM | DBE  | i-FIT  | Norm | Conf (%) | Formula                                        |
|----------|------------|-----|-----|------|--------|------|----------|------------------------------------------------|
| 470.1791 | 470.1786   | 0.5 | 1.1 | 21.5 | 1260.6 | n/a  | n/a      | $\text{C}_{31}\text{H}_{25}\text{N}_3\text{P}$ |

**Figure S14.** HRMS ( $\text{ES}^+$ ) spectrum of **L2**.

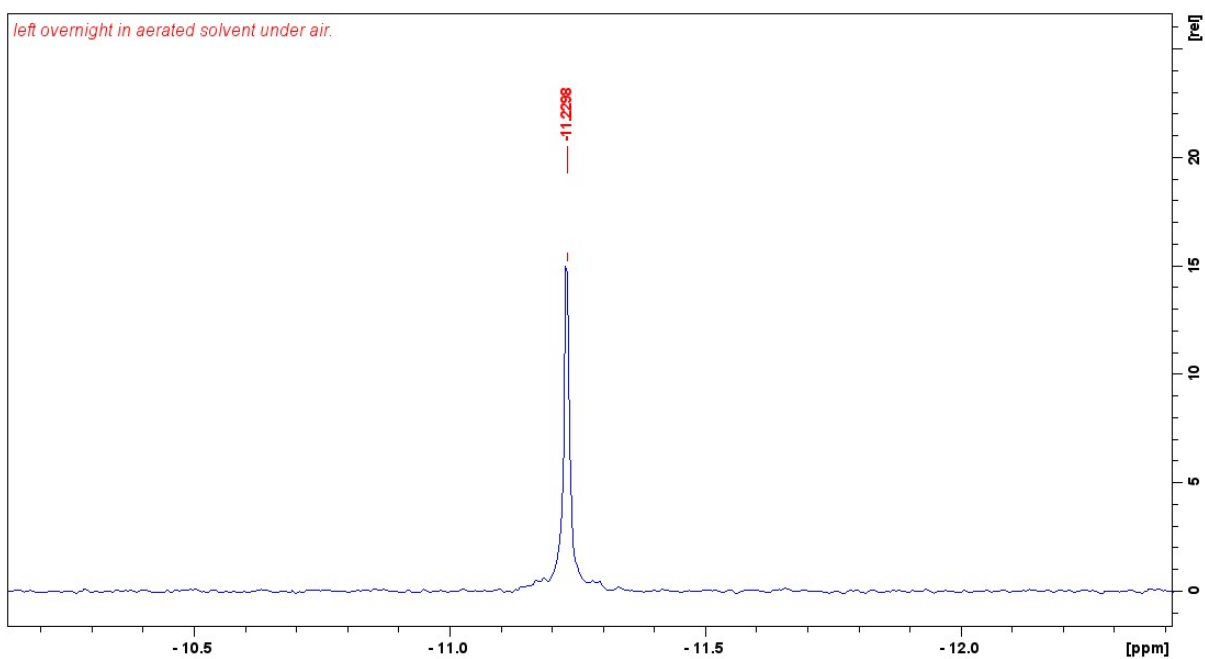

**Figure S15.**  $^{31}\text{P}\{^1\text{H}\}$  NMR spectrum of **RuL1** recorded at 162 MHz in  $\text{d}_6$ -dmsd.

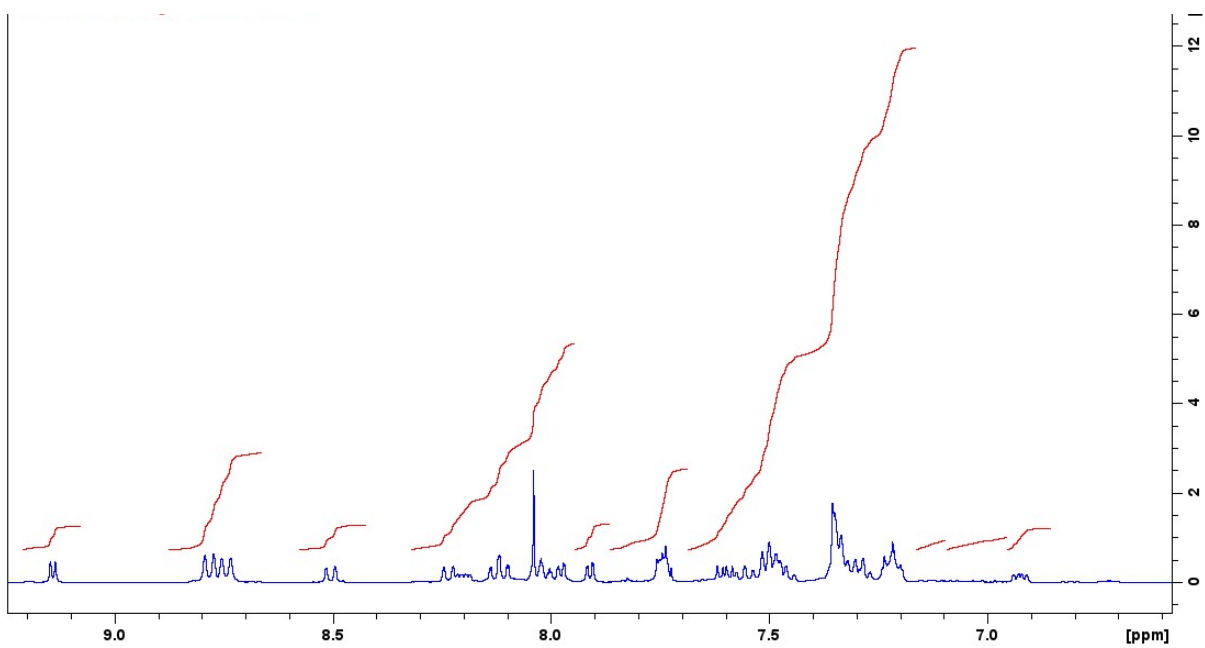

**Figure S16**  $^1\text{H}$  NMR spectra of **RuL1** recorded at 400 MHz in  $\text{d}_6$ -dmsd.

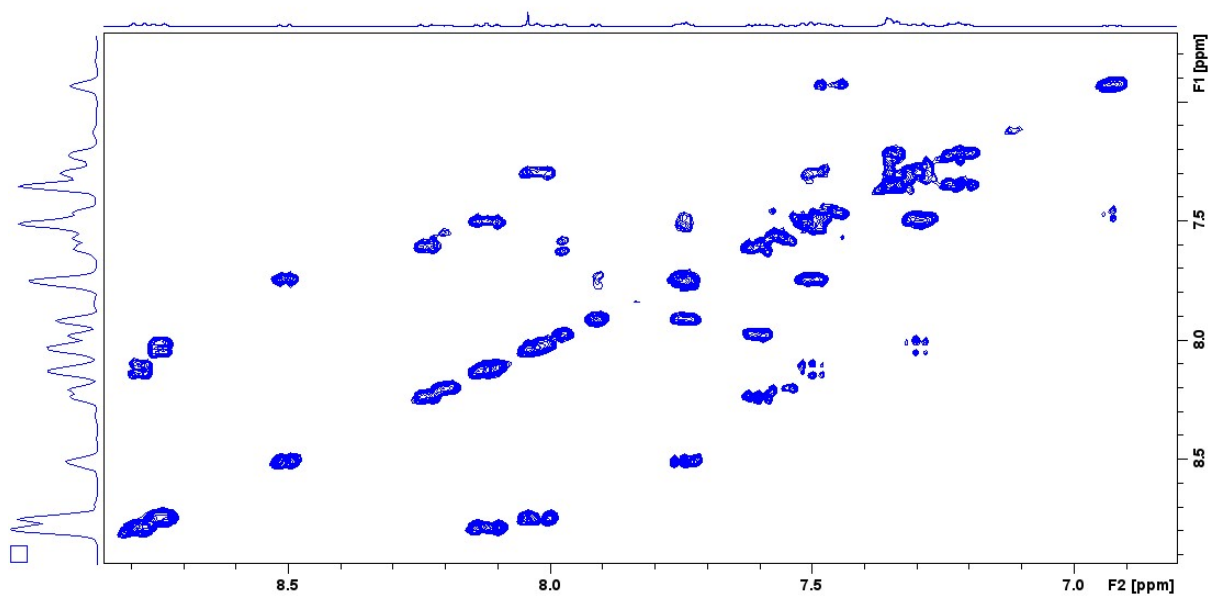

**Figure S17.**  $^1\text{H}$ - $^1\text{H}$  COSY NMR spectrum of **RuL1** recorded at 400 MHz in  $d_6$ -dmsO.

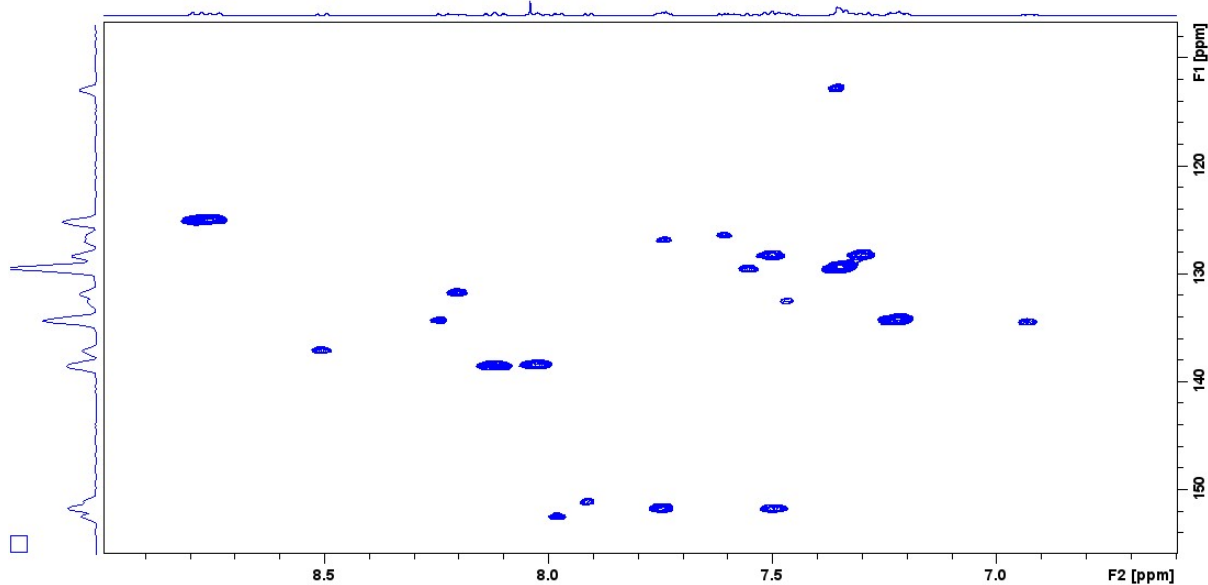

**Figure S18.**  $^1\text{H}$ - $^{13}\text{C}$  HSQC NMR spectrum of **RuL1** recorded in  $d_6$ -dmsO.

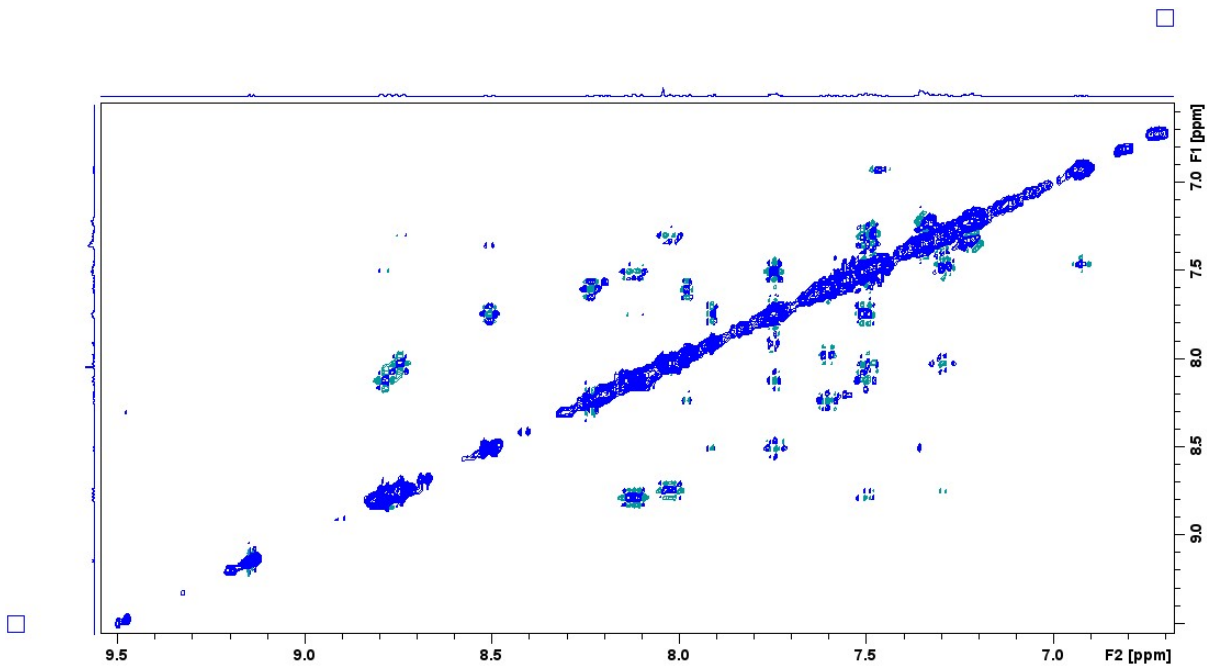

Figure S19.  $^1\text{H}$ - $^1\text{H}$  NOESY NMR spectrum of RuL1 recorded at 400 MHz in  $d_6$ -dmsO.

20-Apr-2023

RuphenP

XEVO-G2XSQTOF#NotSet  
Cardiff University  
1: TOF MS ES+  
1.87e6

PDN\_MS41628\_ESP 12 (0.259) Cm (12-1)

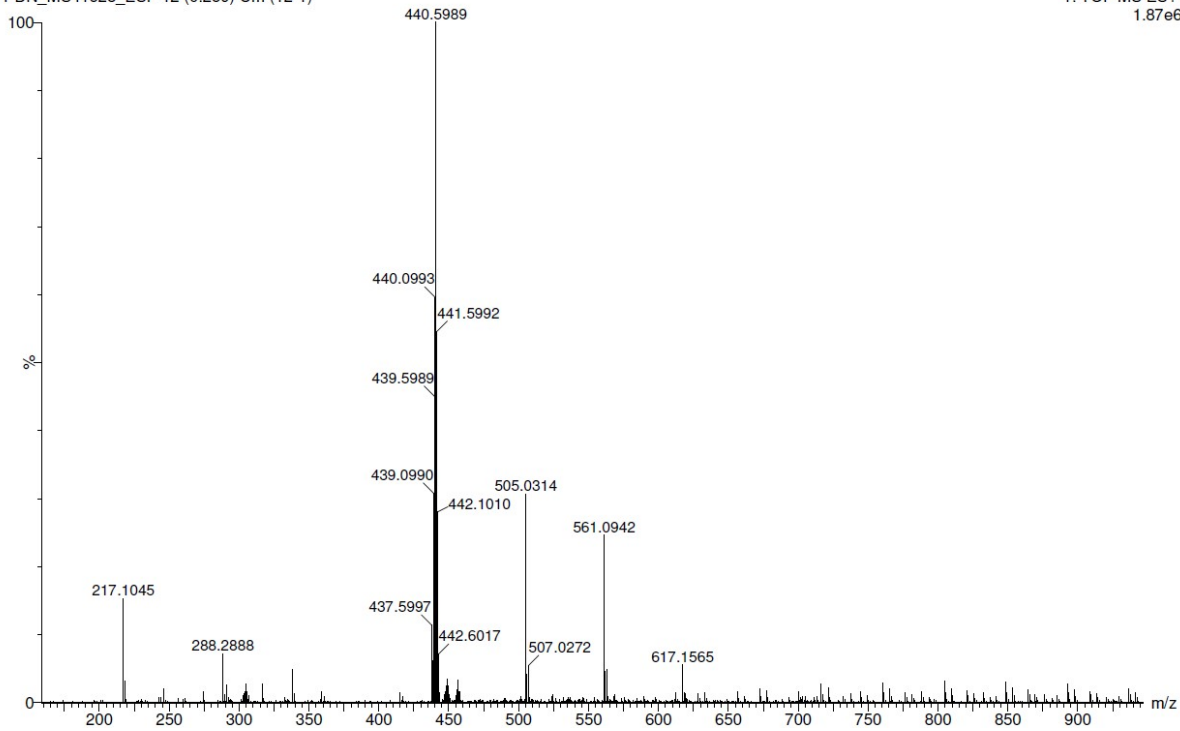

20-Apr-2023

XEVO-G2XSQTOF#NotSet  
Cardiff University  
1: TOF MS ES+  
2.47e12

PDN\_MS41628\_ESP (0.054) Is (1.00,1.00) C<sub>51</sub>H<sub>36</sub>N<sub>7</sub>PRu

RuphenP

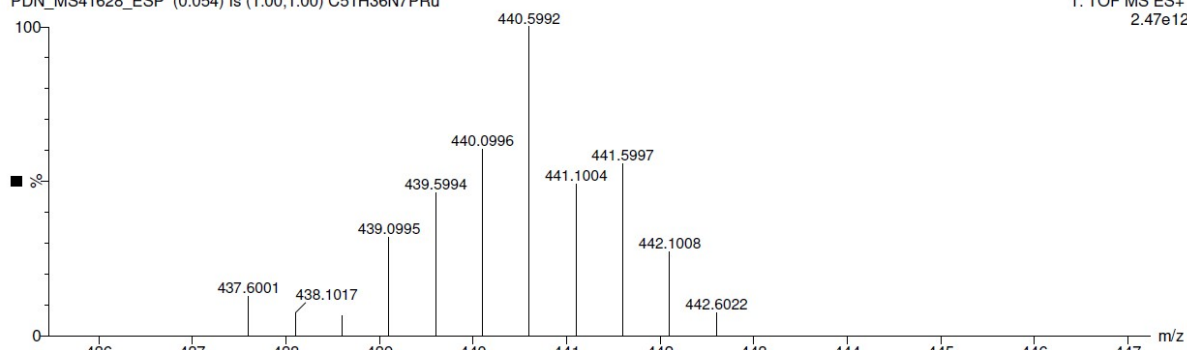

PDN\_MS41628\_ESP 12 (0.259) Cm (12-1)

1: TOF MS ES+  
1.87e6

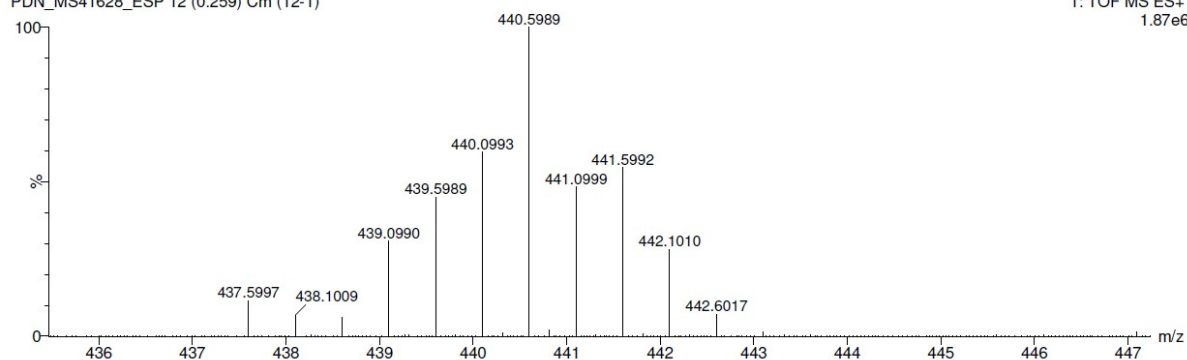

**Figure S20.** HRMS (ES<sup>+</sup>) spectrum of **RuL1**.

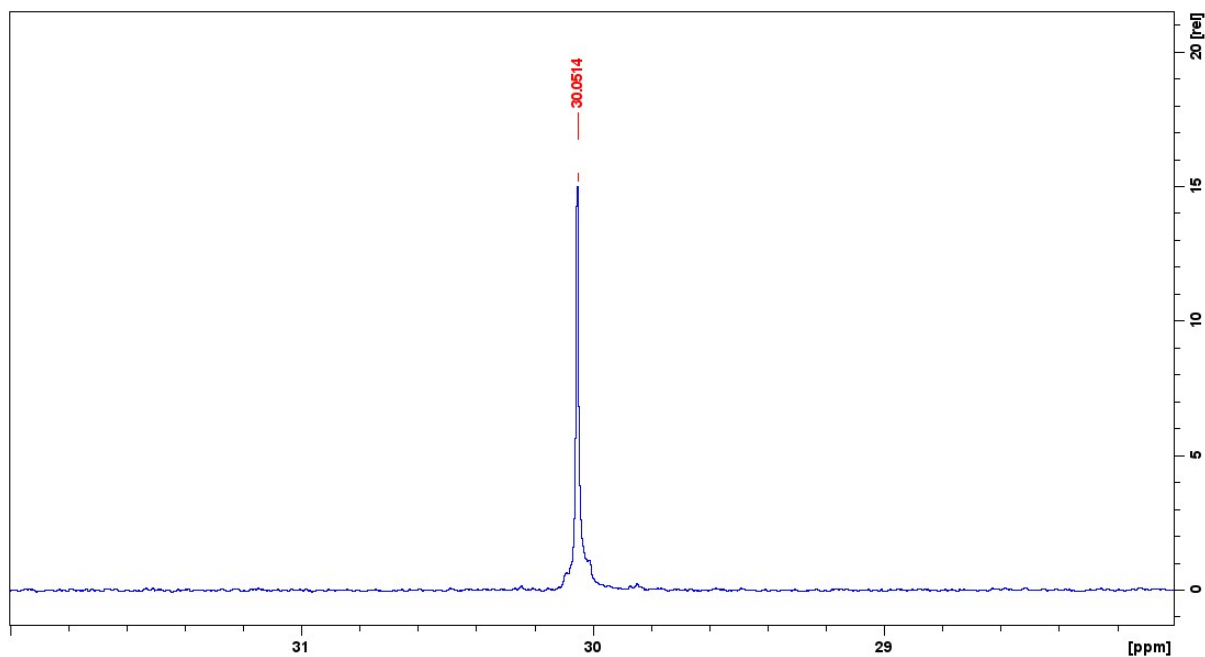

**Figure S21.** <sup>31</sup>P{<sup>1</sup>H} NMR spectrum of **RuAuL1** recorded at 162 MHz in d<sub>6</sub>-dmsO.

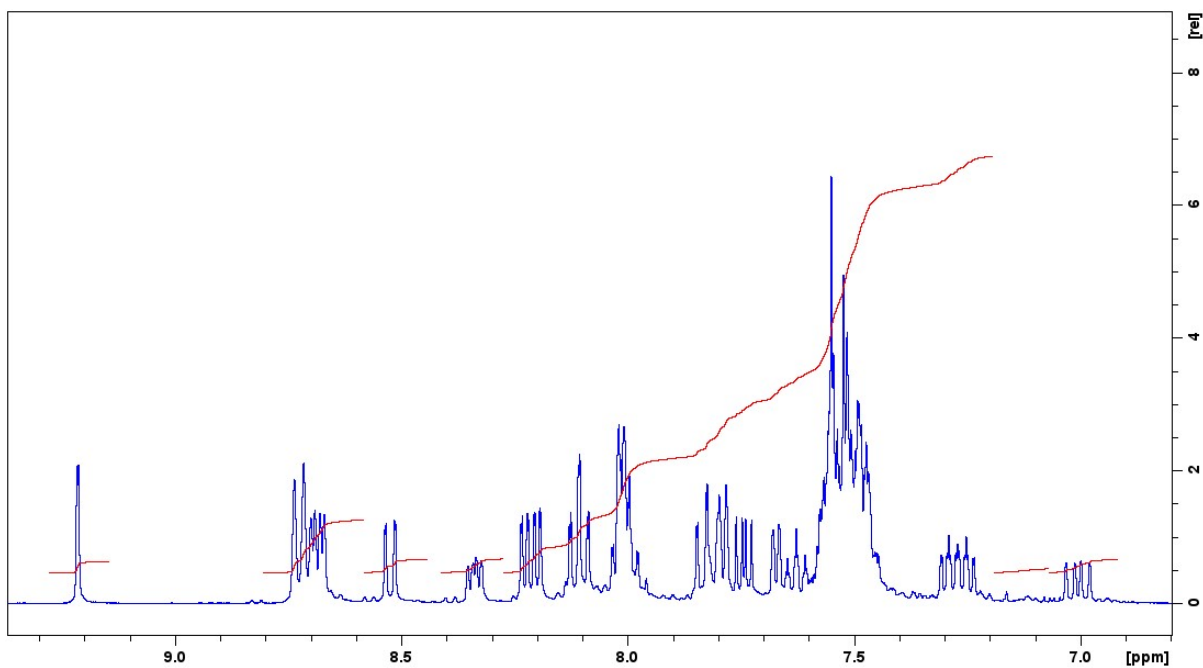

Figure S22  $^1\text{H}$  NMR spectra of RuAuL1 recorded at 400 MHz in  $d_6$ -dmsO.

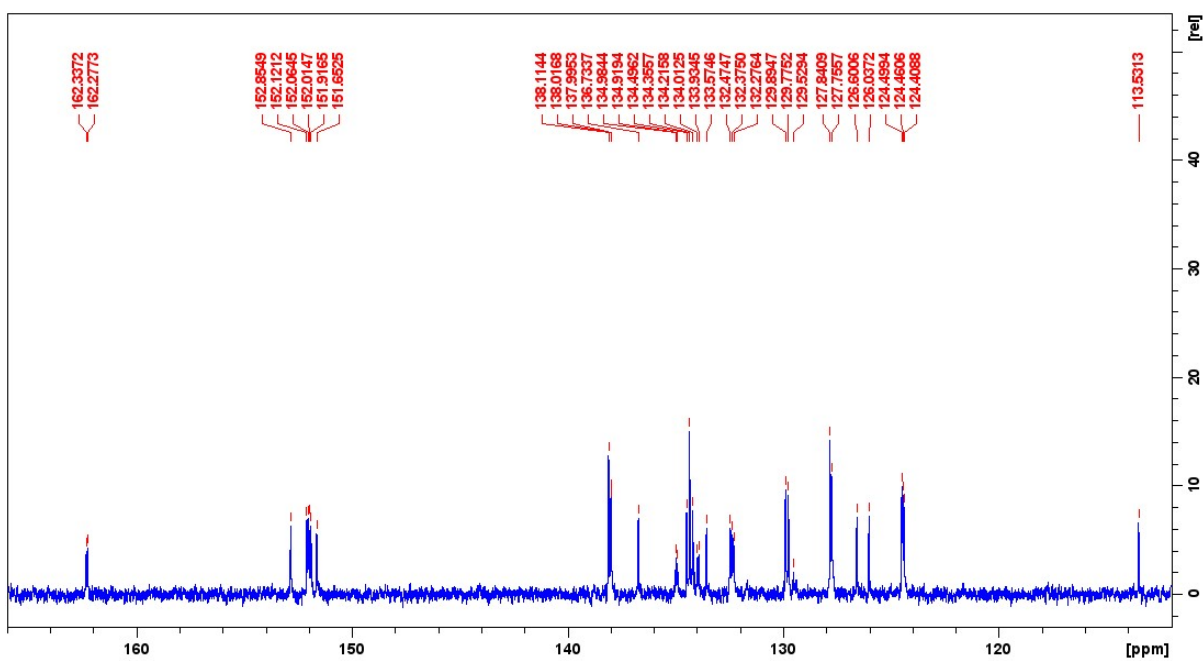

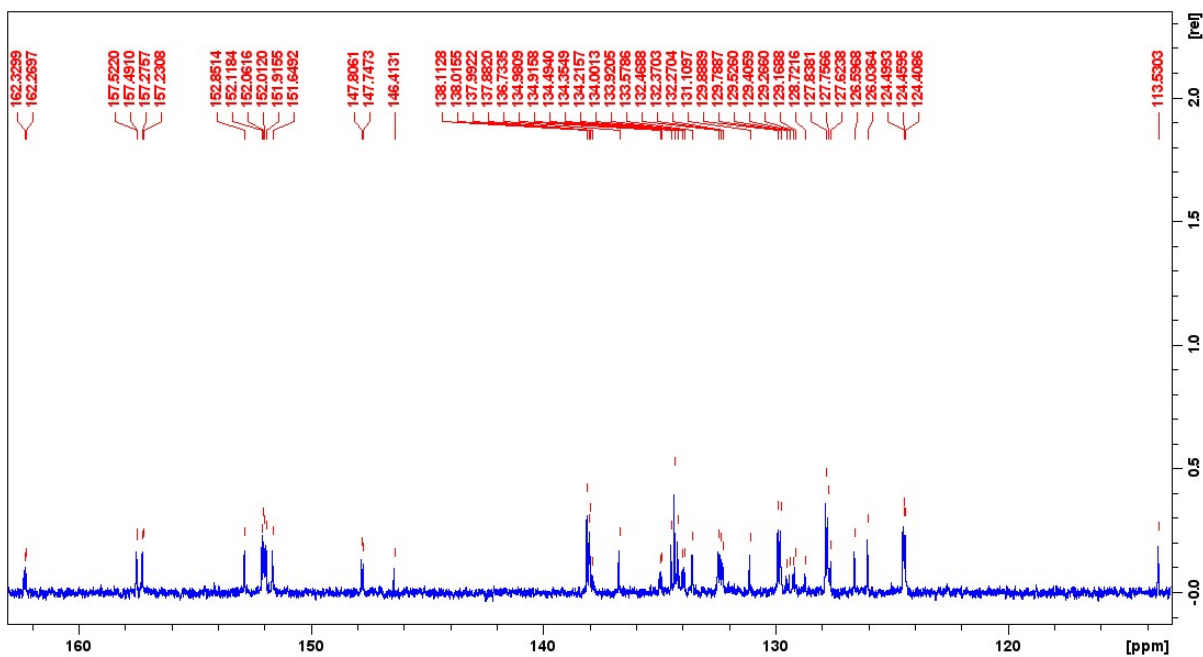

Figure S23.  $^{13}\text{C}\{^1\text{H}\}$  NMR spectra of **RuAuL1** recorded at 75 MHz in  $d_6$ -dmsO.

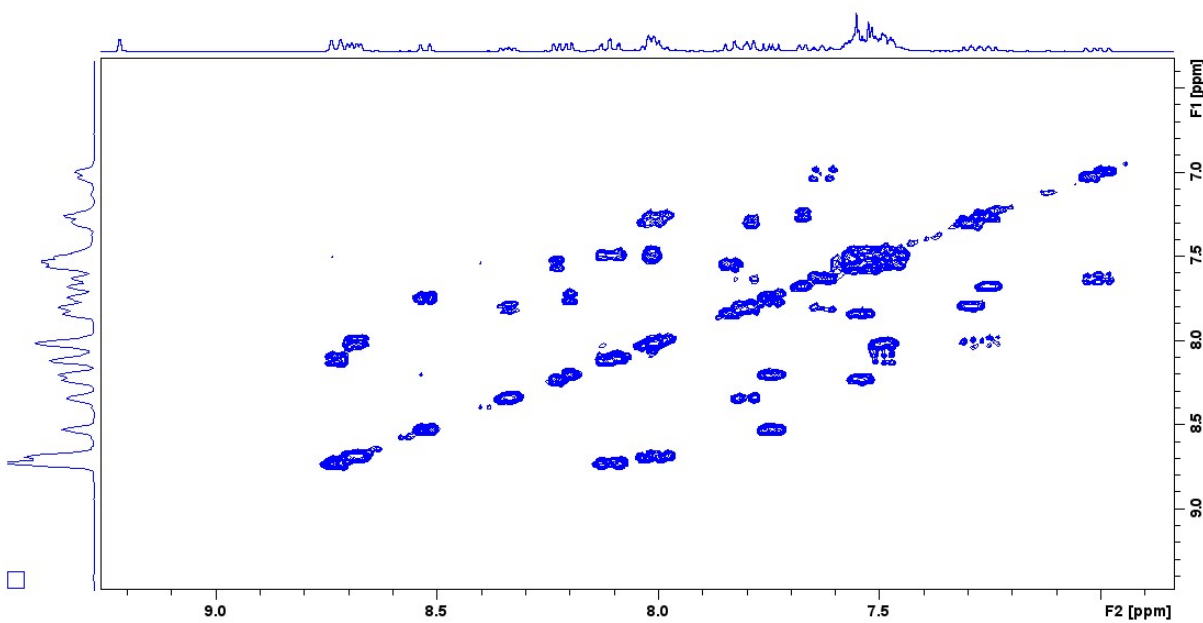

Figure S24.  $^1\text{H}$ - $^1\text{H}$  COSY NMR spectrum of **RuAuL1** recorded at 400 MHz in  $d_6$ -dmsO.

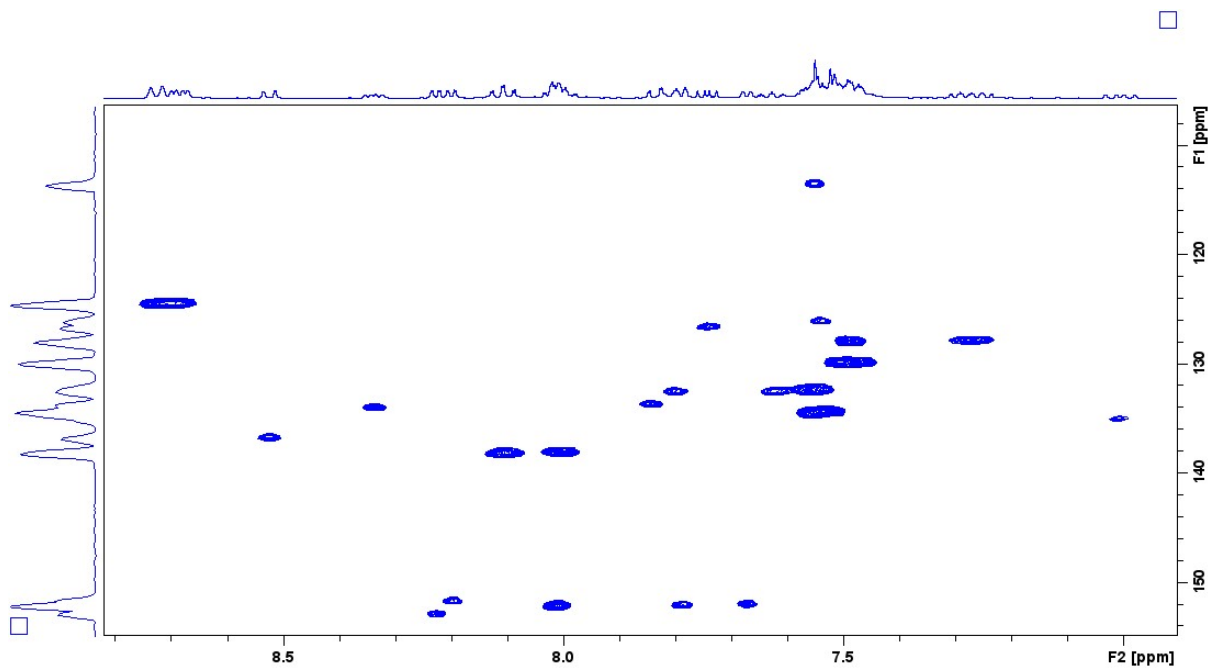

Figure S25.  $^1\text{H}$ - $^{13}\text{C}$  HSQC NMR spectrum of RuAuL1 recorded in  $\text{d}_6$ -dmsO.

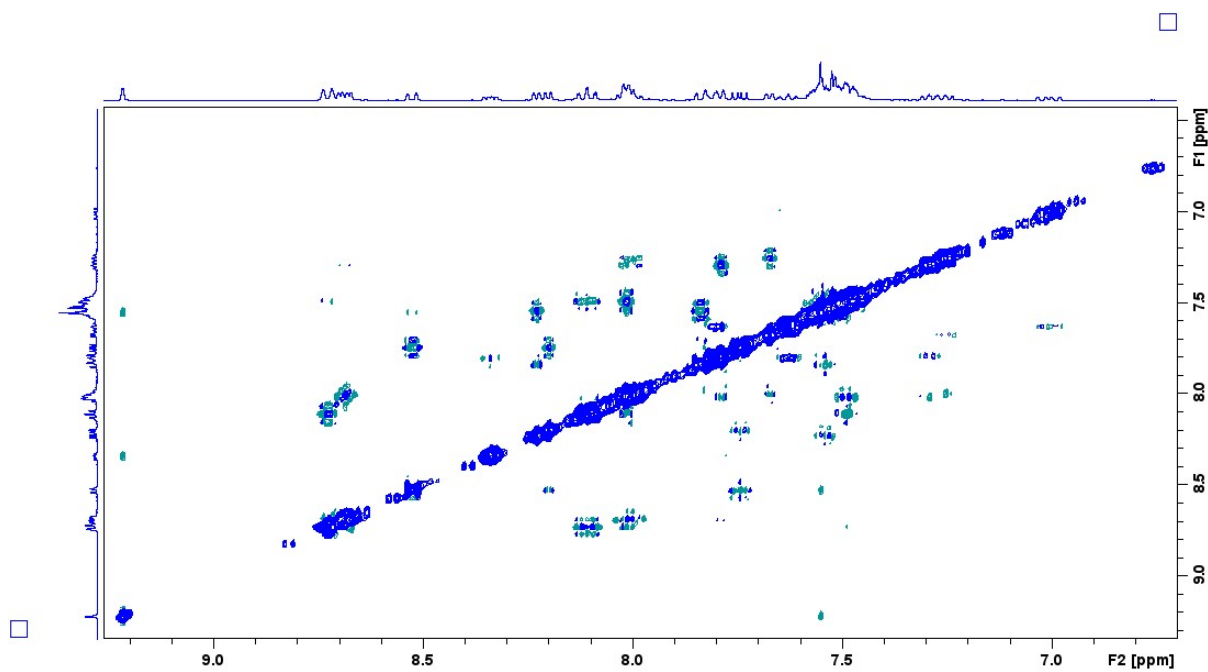

Figure S26.  $^1\text{H}$ - $^1\text{H}$  NOESY NMR spectrum of RuAuL1 recorded at 400 MHz in  $\text{d}_6$ -dmsO.



28-Apr-2023

XEVO-G2XSQTOF#NotSet  
Cardiff University  
1: TOF MS ES+  
2.67e7

PDN\_MS41702\_ESP 17 (0.364)

RuphenAu

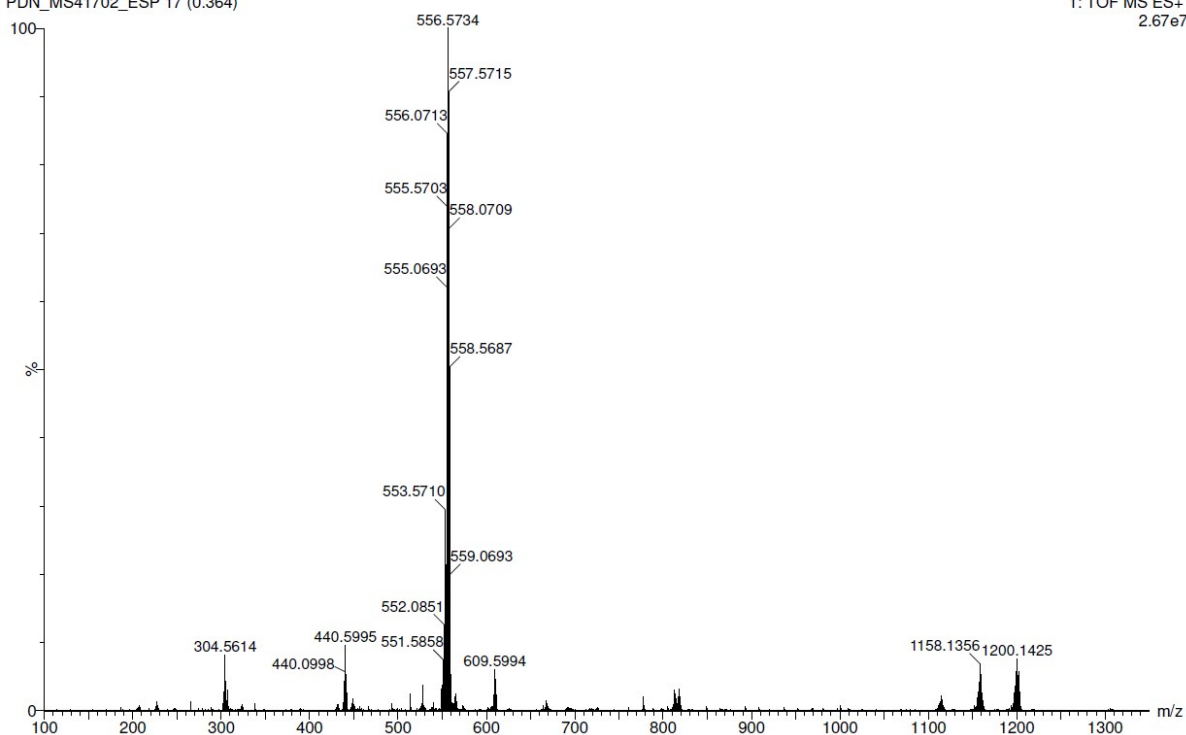

Minimum: -1.5  
Maximum: 5.0 10.0 100.0

| Mass      | Calc. Mass | mDa | PPM | DBE  | i-FIT | Norm | Conf (%) | Formula                          |
|-----------|------------|-----|-----|------|-------|------|----------|----------------------------------|
| 1200.1371 | 1200.1353  | 1.8 | 1.5 | 35.5 | 766.9 | n/a  | n/a      | C51 H38 B N7 F4 P Cl 102Ru 197Au |

Figure S27. HRMS (ES<sup>+</sup>) spectrum of RuAuL1.

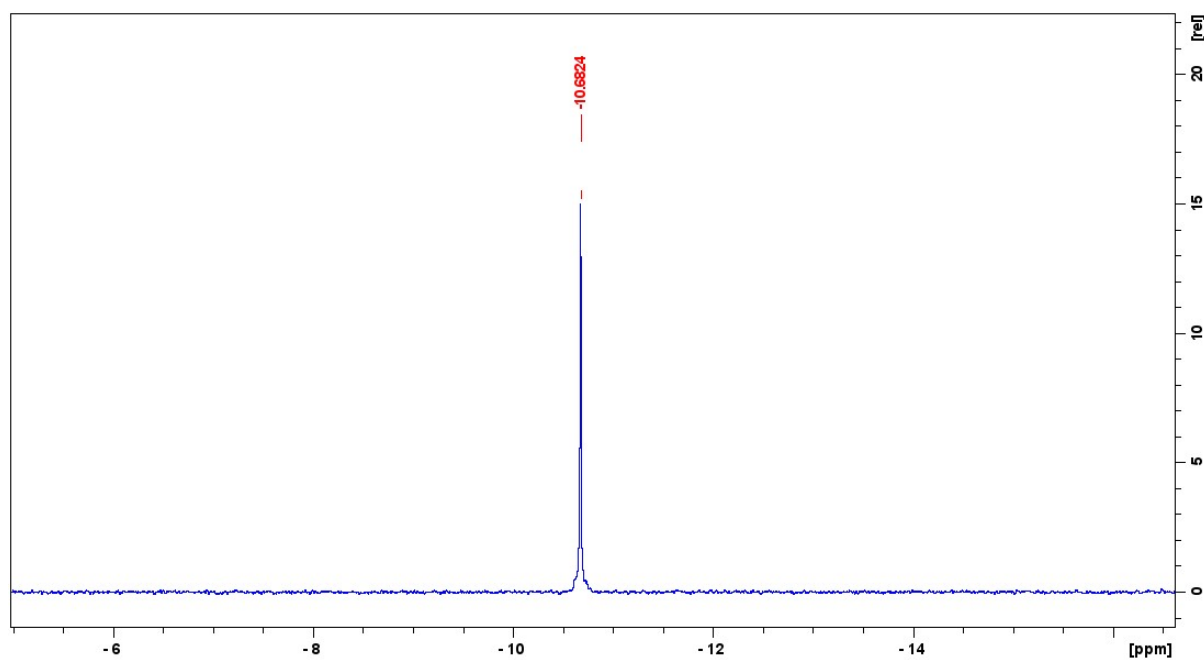

Figure S28. <sup>31</sup>P{<sup>1</sup>H} NMR spectrum of ReL1 recorded at 162 MHz in CDCl<sub>3</sub>.

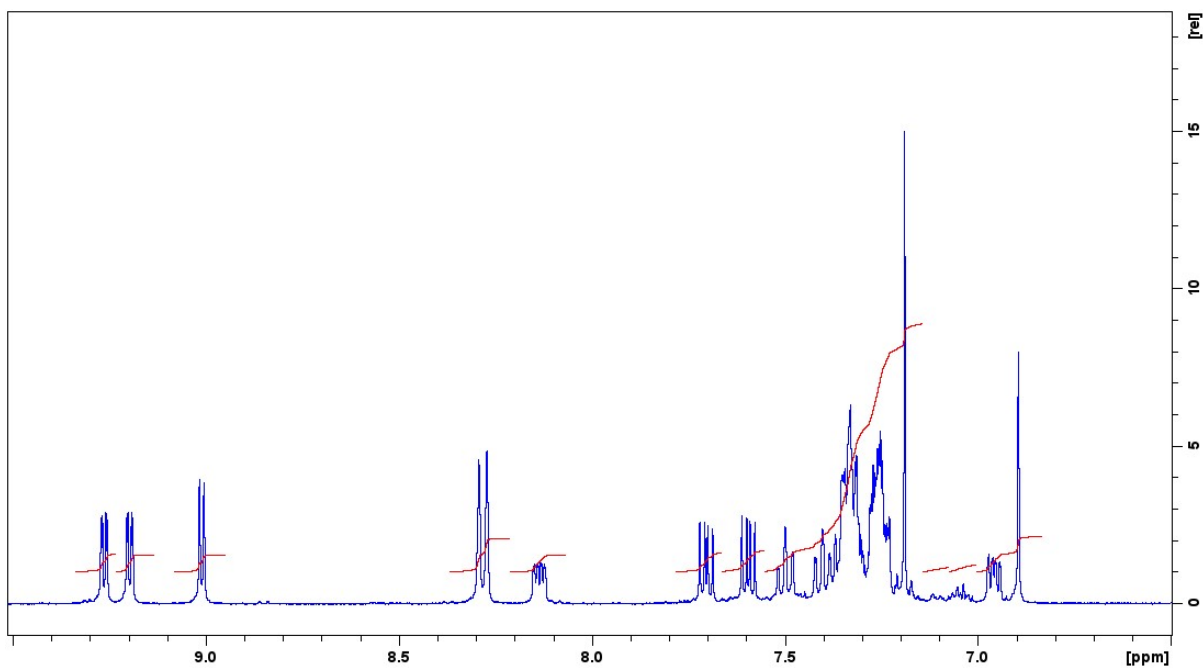

Figure S29  $^1\text{H}$  NMR spectra of ReL1 recorded at 400 MHz in  $\text{CDCl}_3$ .

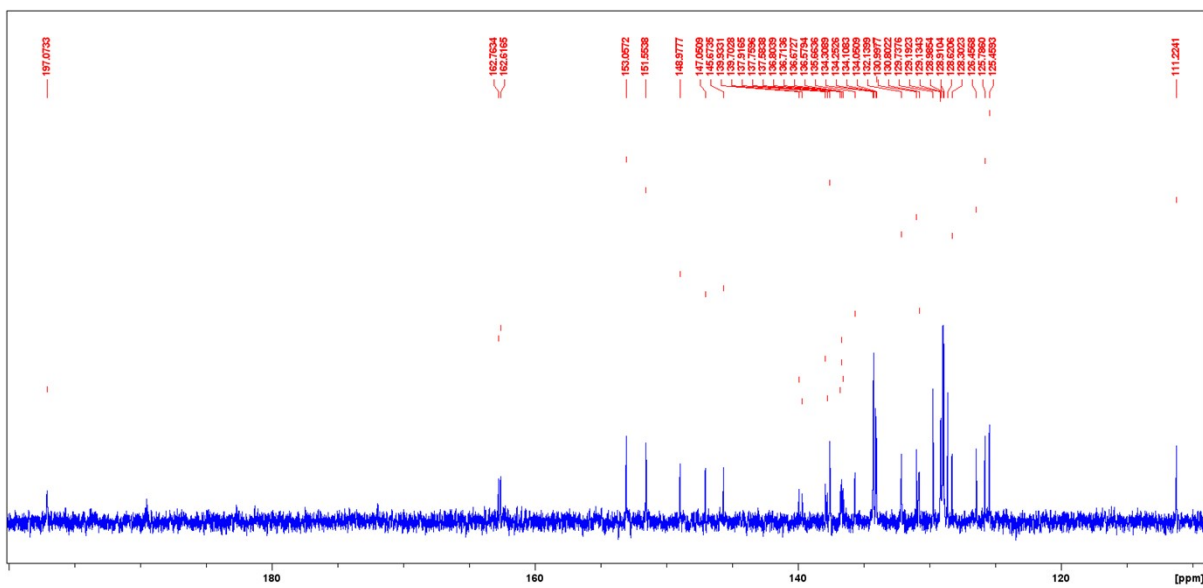

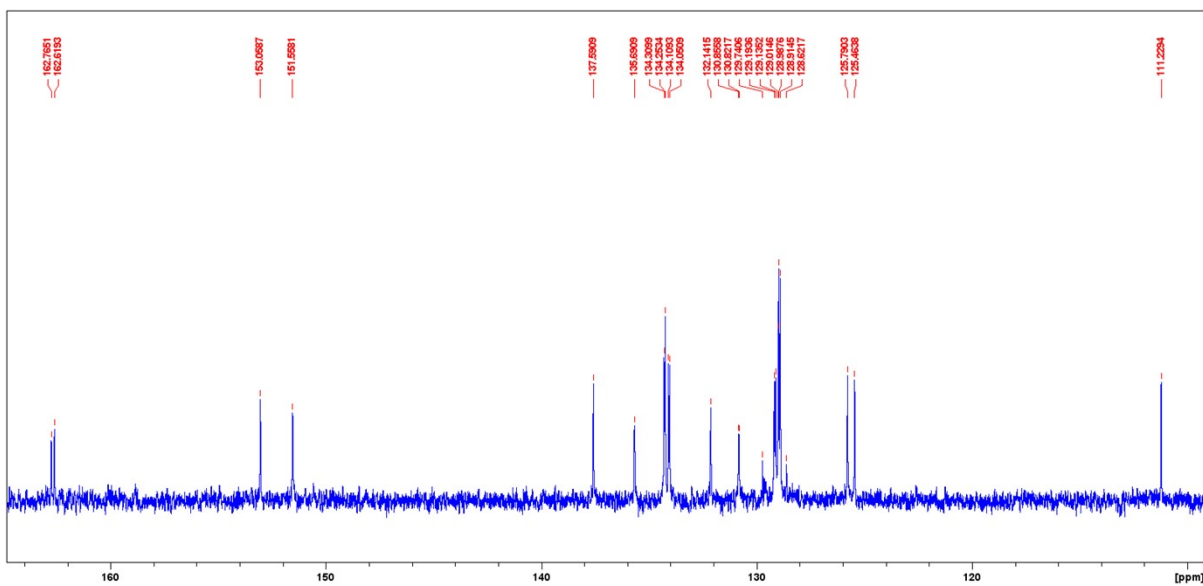

Figure S30.  $^{13}\text{C}\{^1\text{H}\}$  NMR spectra of **ReL1** recorded at 75 MHz in  $\text{CDCl}_3$ .

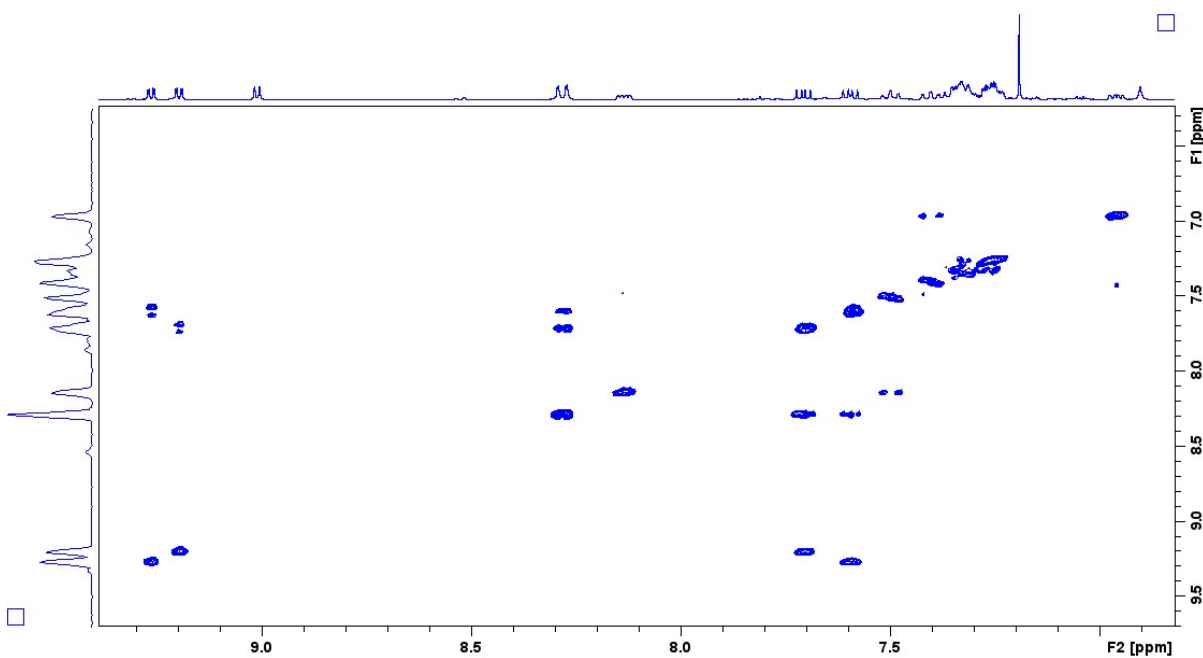

Figure S31.  $^1\text{H}$ - $^1\text{H}$  COSY NMR spectrum of **ReL1** recorded at 400 MHz in  $\text{CDCl}_3$ .

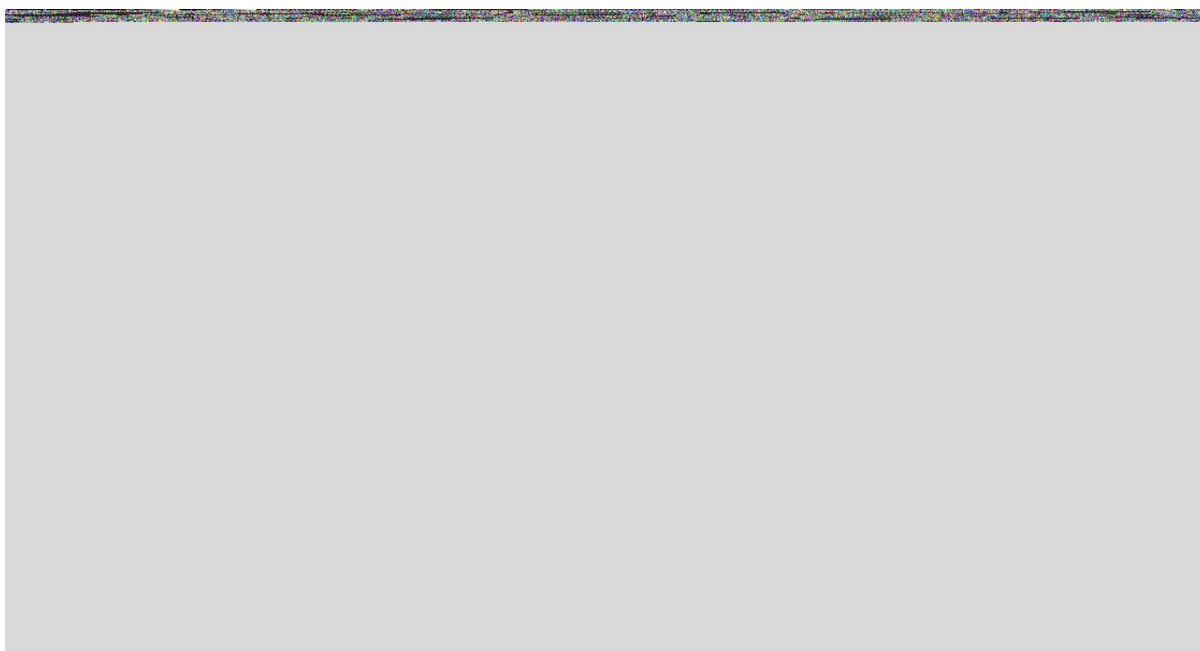

**Figure S32.**  $^1\text{H}$ - $^{13}\text{C}$  HSQC NMR spectrum of **ReL1** recorded in  $\text{CDCl}_3$ .

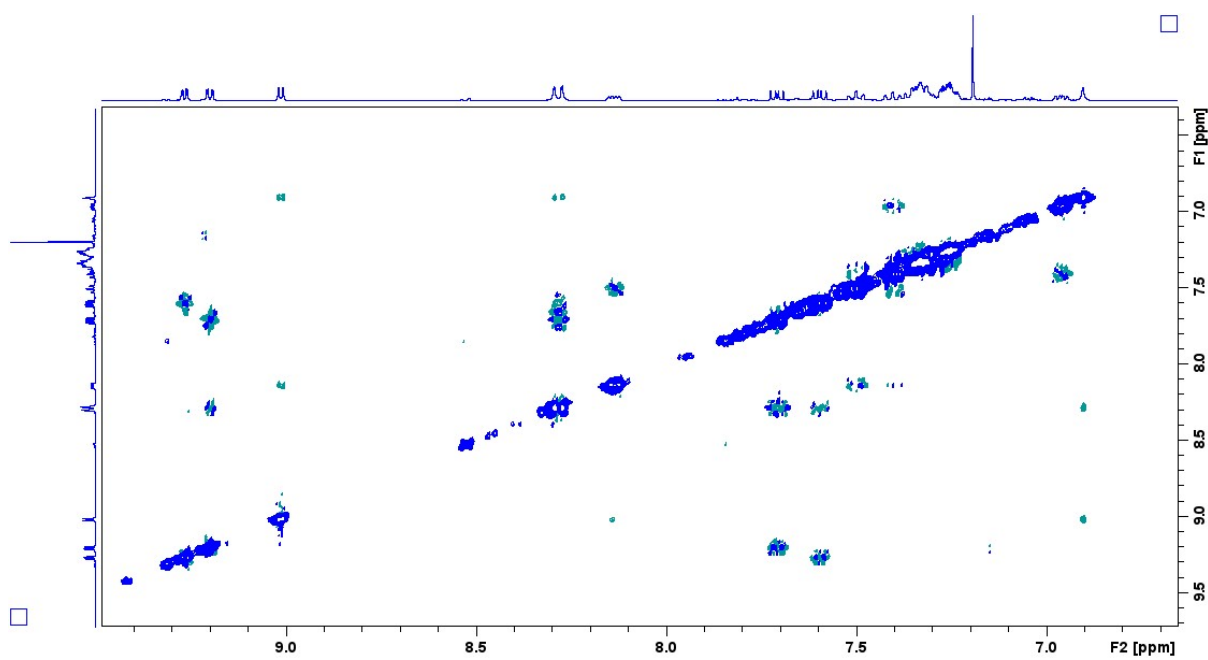

**Figure S33.**  $^1\text{H}$ - $^1\text{H}$  NOESY NMR spectrum of **ReL1** recorded at 400 MHz in  $\text{CDCl}_3$ .

27-Mar-2023

PDN\_MS41376\_ESP 21 (0.431) Cm (21-1)

RePhenP

XEVO-G2XSQTOF#NotSet  
Cardiff University  
1: TOF MS ES+  
1.04e5

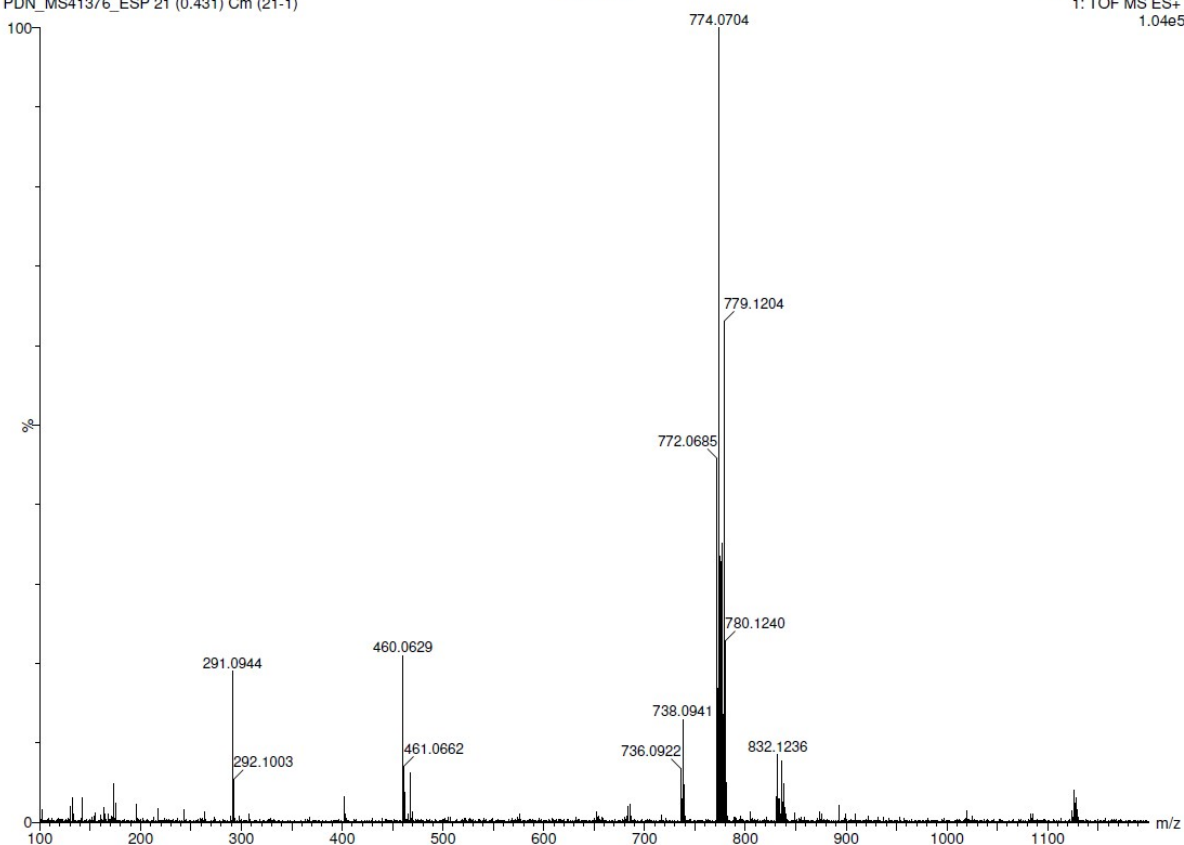

Minimum: -1.5  
Maximum: 5.0 10.0 100.0

| Mass     | Calc. Mass | mDa | PPM | DBE  | i-FIT | Norm | Conf (%) | Formula                  |
|----------|------------|-----|-----|------|-------|------|----------|--------------------------|
| 774.0706 | 774.0693   | 1.3 | 1.7 | 19.5 | 322.5 | n/a  | n/a      | C27 H20 N3 O 185Re 187Re |

**Figure S34.** HRMS (ES<sup>+</sup>) spectrum of ReL1.

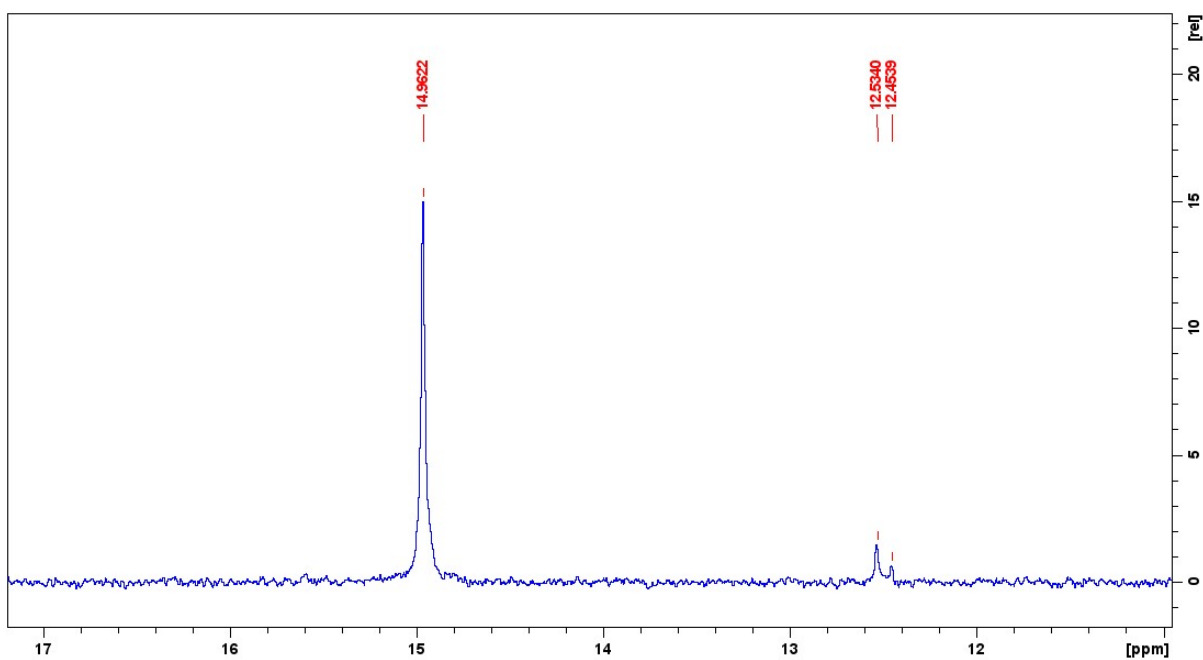

**Figure S35.**  $^{31}\text{P}\{^1\text{H}\}$  NMR spectrum of **2ReL1** recorded at 162 MHz in  $\text{d}_6$ -acetone.

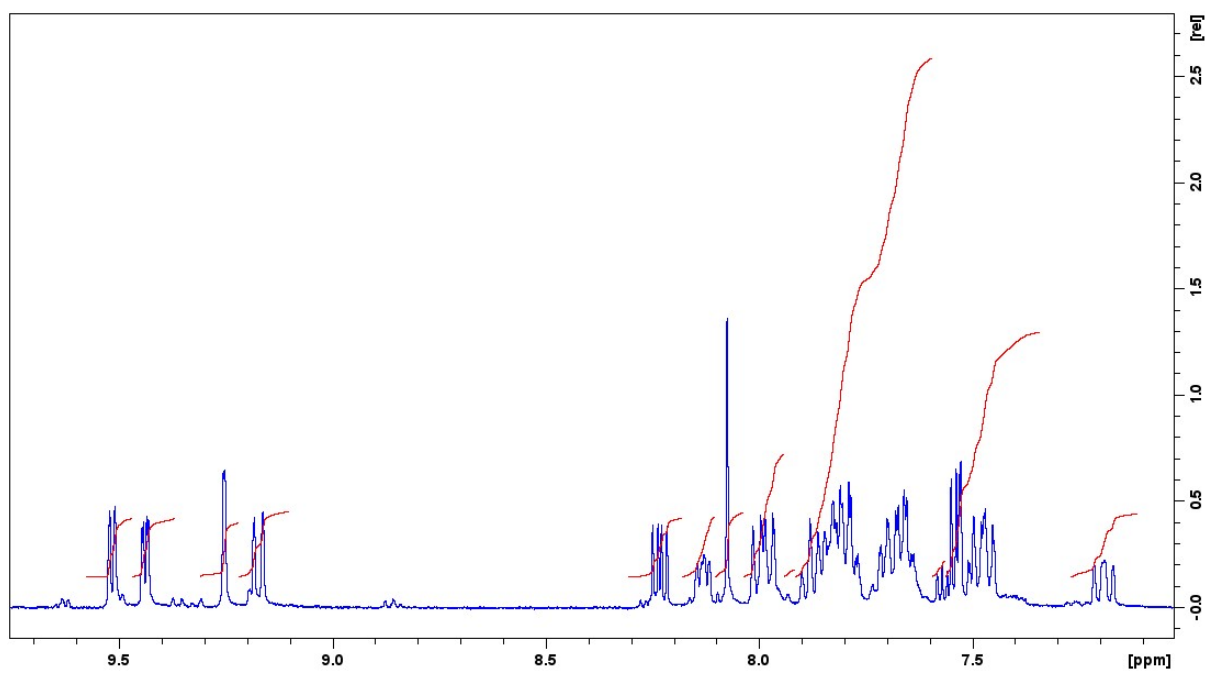

**Figure S36.**  $^1\text{H}$  NMR spectra of **2ReL1** recorded at 400 MHz in  $\text{d}_6$ -acetone.

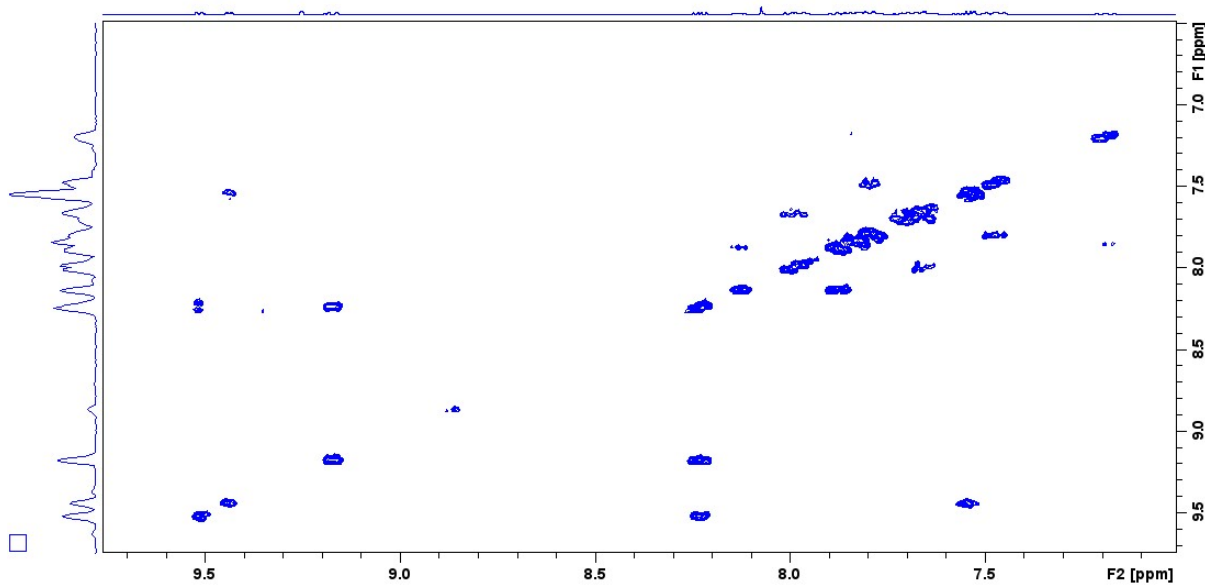

**Figure S37.**  $^1\text{H}$ - $^1\text{H}$  COSY NMR spectrum of **2ReL1** recorded at 400 MHz in  $\text{d}_6$ -acetone.

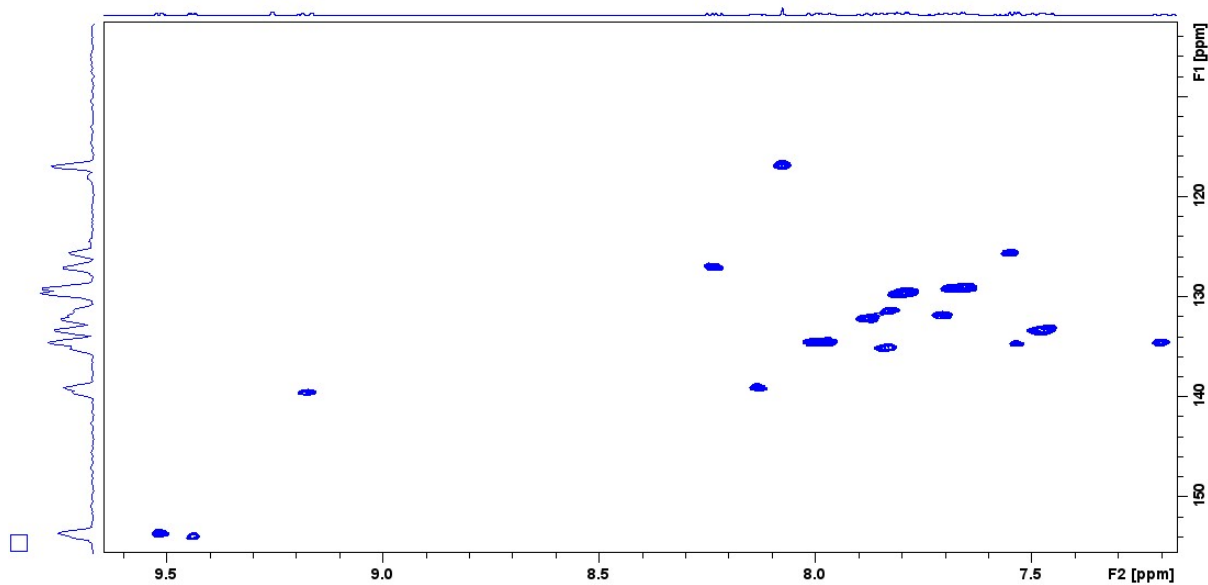

**Figure S38.**  $^1\text{H}$ - $^{13}\text{C}$  HSQC NMR spectrum of **2ReL1** recorded in  $\text{d}_6$ -acetone.

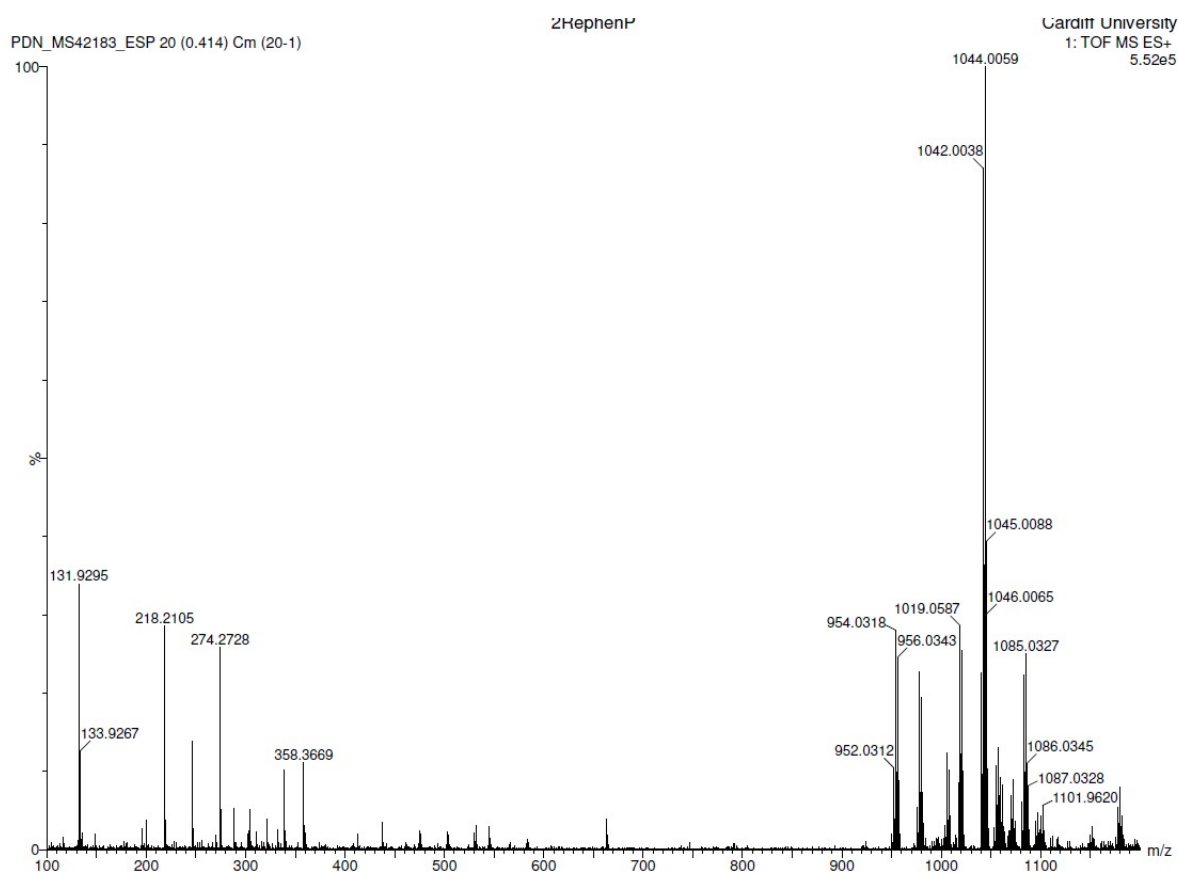

| Minimum:  |            |        |     | -1.5 |       |      |          |                                                                               |
|-----------|------------|--------|-----|------|-------|------|----------|-------------------------------------------------------------------------------|
| Maximum:  |            | 5000.0 | 5.0 | 50.0 |       |      |          |                                                                               |
| Mass      | Calc. Mass | mDa    | PPM | DBE  | i-FIT | Norm | Conf (%) | Formula                                                                       |
| 1042.0038 | 1042.0022  | 1.6    | 1.5 | 28.5 | 649.6 | n/a  | n/a      | $\text{C}_{37}\text{H}_{22}\text{N}_3\text{O}_6\text{P}\text{Cl}$ 185Re 187Re |

**Figure S39.** HRMS ( $\text{ES}^+$ ) spectrum of **2ReL1**.

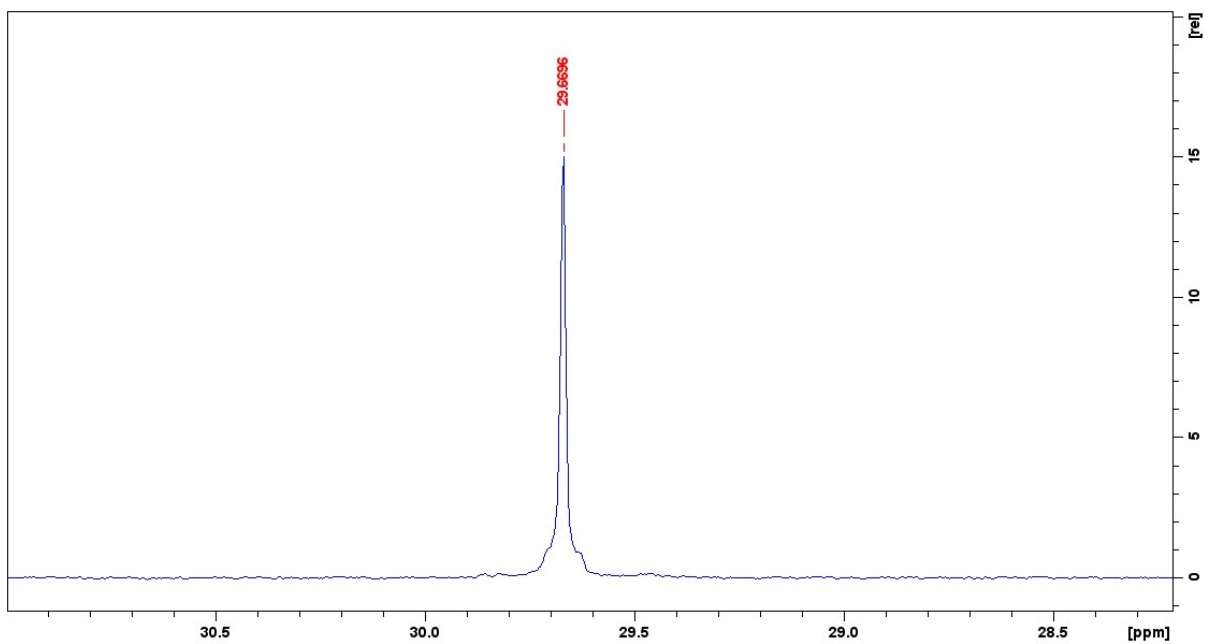

**Figure S40.**  $^{31}\text{P}\{^1\text{H}\}$  NMR spectrum of **ReAuL1** recorded at 162 MHz in  $\text{CD}_2\text{Cl}_2$ .

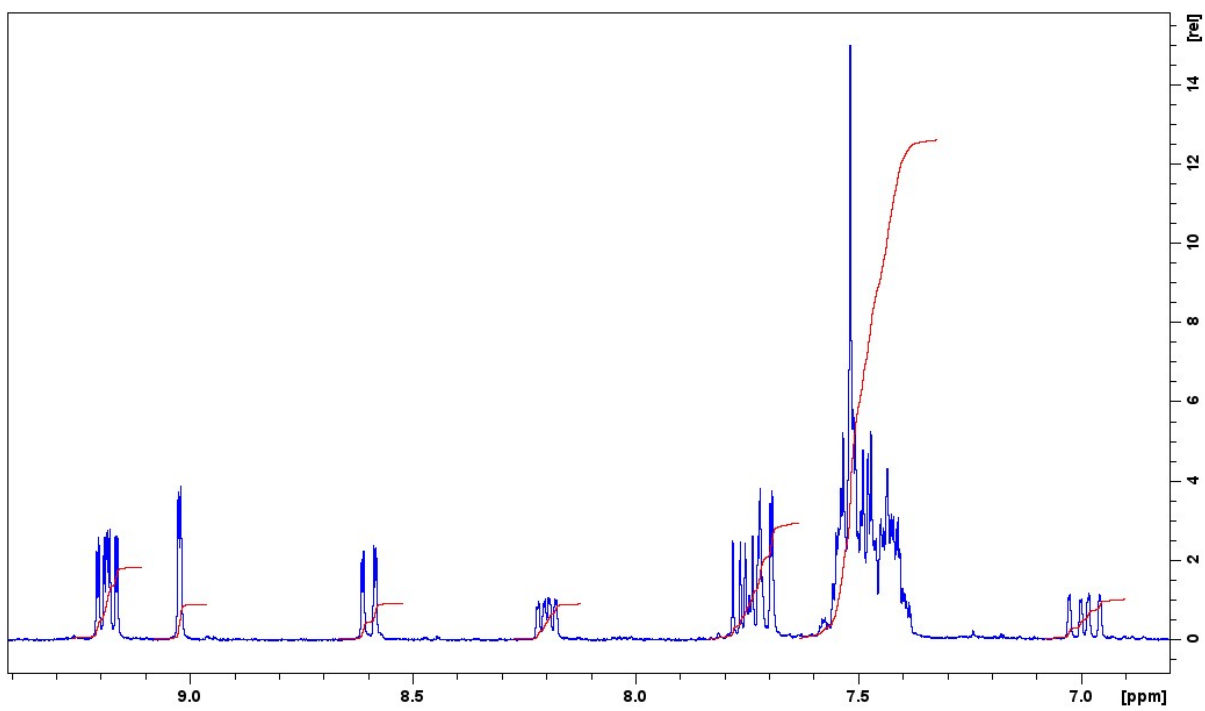

**Figure S41**  $^1\text{H}$  NMR spectra of **ReAuL1** recorded at 400 MHz in  $\text{CD}_2\text{Cl}_2$ .



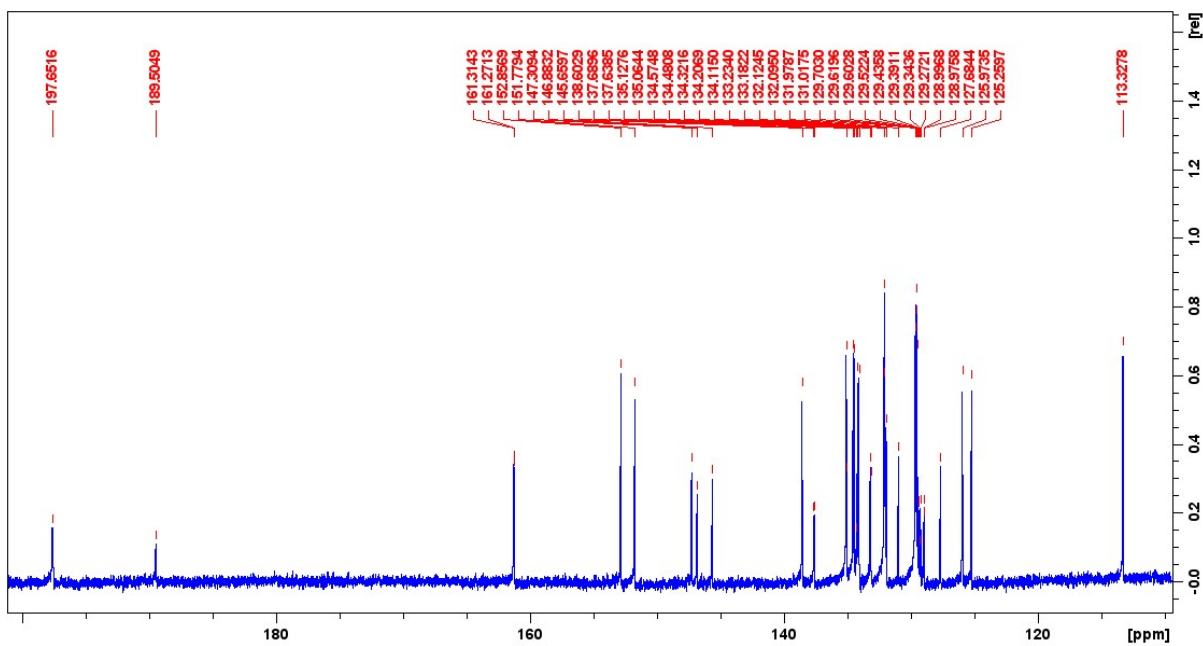

**Figure S42.**  $^{13}\text{C}\{^1\text{H}\}$  NMR spectrum of **ReAuL1** recorded at 75 MHz in  $\text{CD}_2\text{Cl}_2$ .

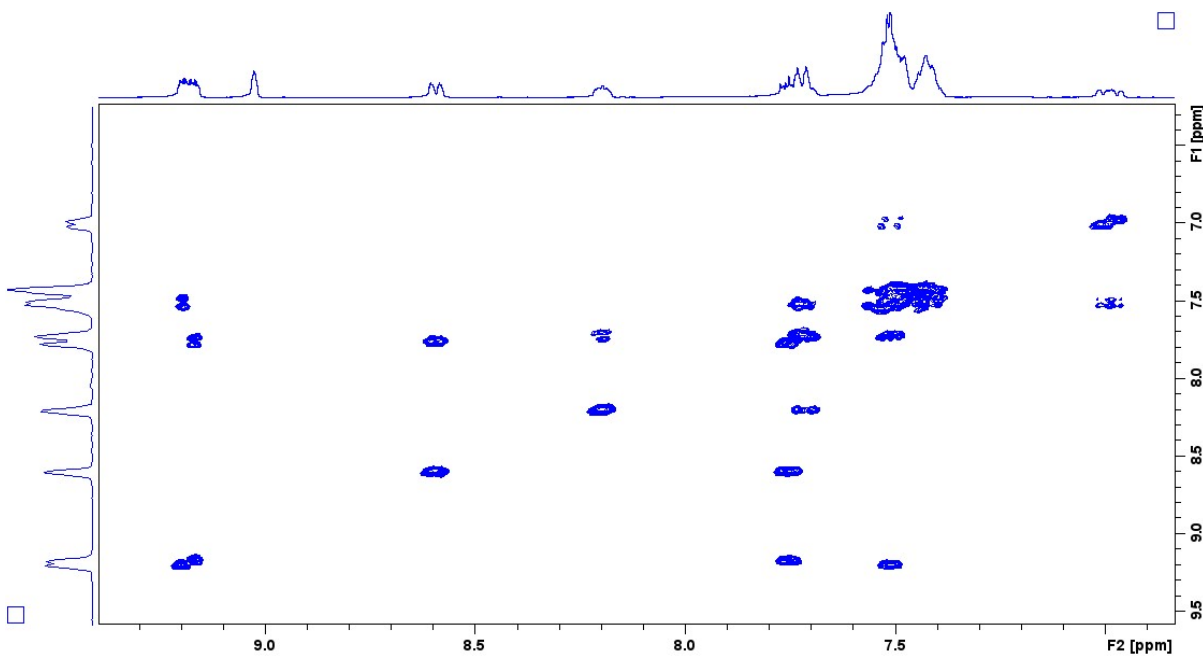

**Figure S43.**  $^1\text{H}$ - $^1\text{H}$  COSY NMR spectrum of **ReAuL1** recorded at 400 MHz in  $\text{CD}_2\text{Cl}_2$ .

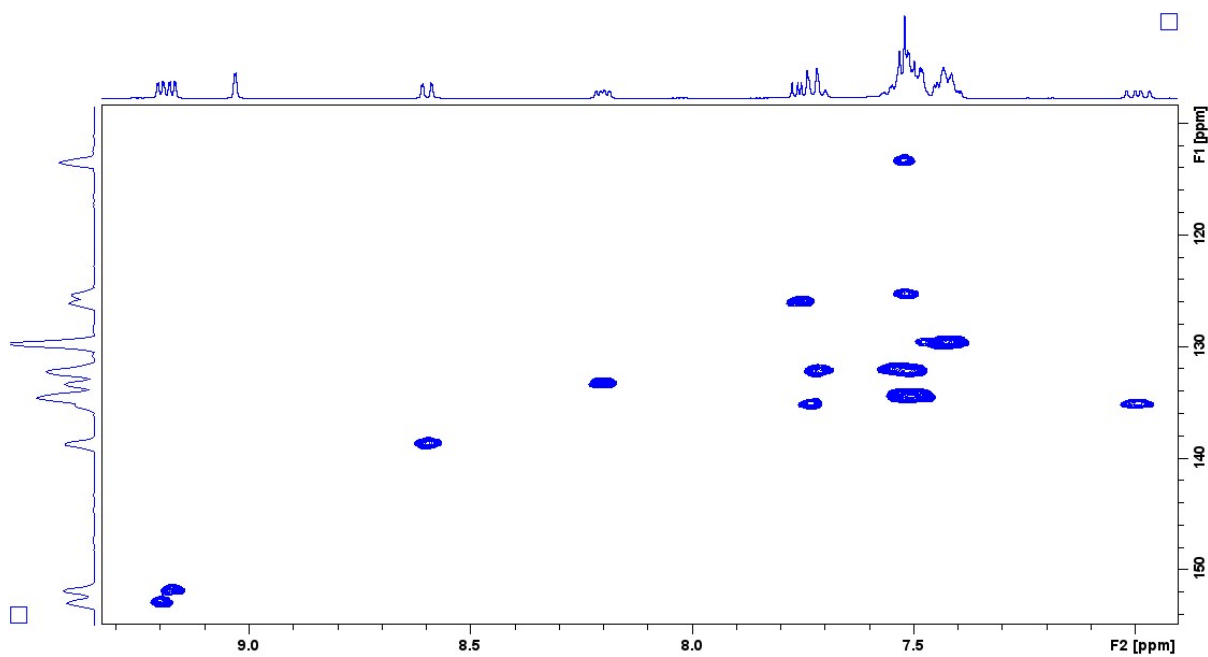

**Figure S44.**  $^1\text{H}$ - $^{13}\text{C}$  HSQC NMR spectrum of **ReAuL1** recorded in  $\text{CD}_2\text{Cl}_2$ .

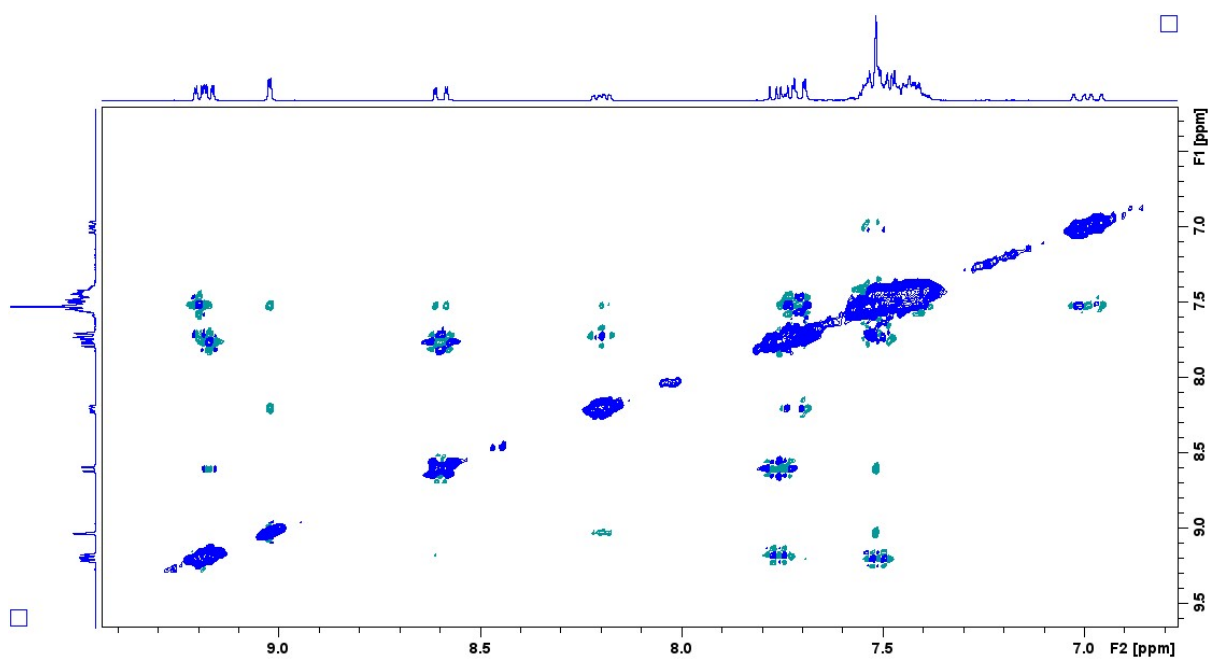

**Figure S45.**  $^1\text{H}$ - $^1\text{H}$  NOESY NMR spectrum of **ReAuL1** recorded at 400 MHz in  $\text{CD}_2\text{Cl}_2$ .

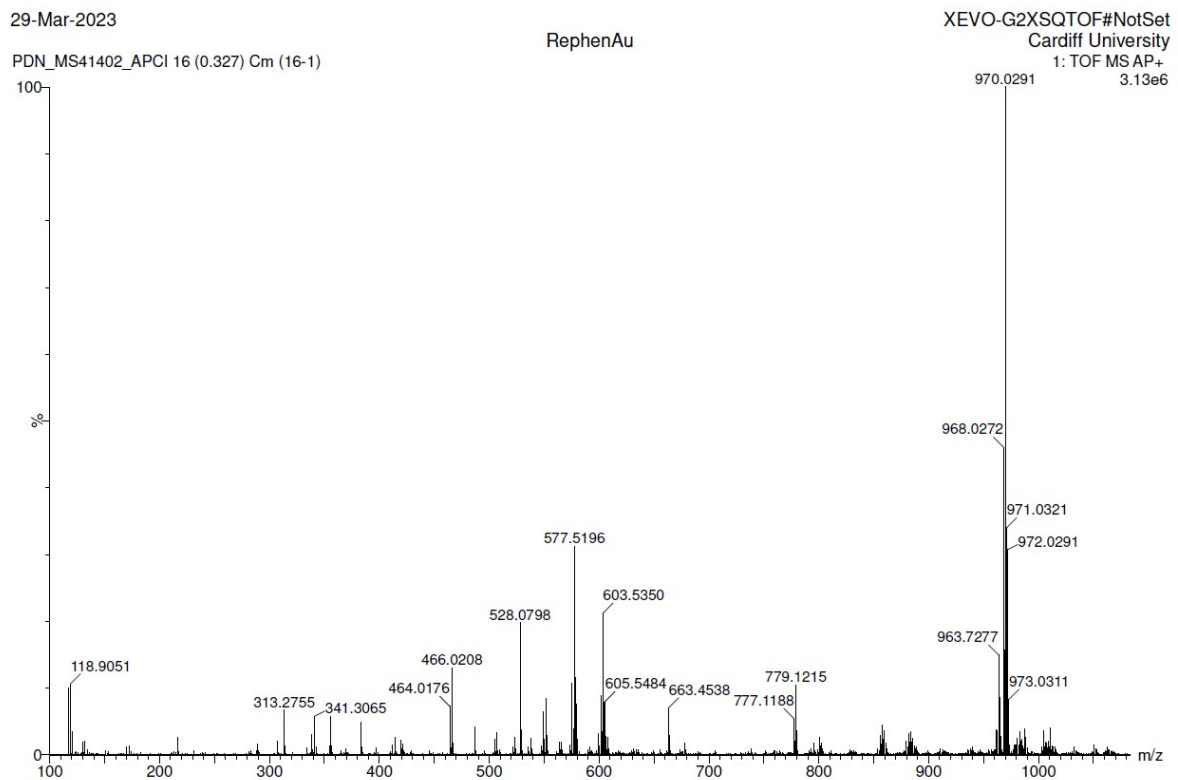

| Minimum: |            |      |      |       |       |      |          |                                   |  |
|----------|------------|------|------|-------|-------|------|----------|-----------------------------------|--|
| Maximum: | 5.0        | 10.0 | -1.5 | 100.0 |       |      |          |                                   |  |
| Mass     | Calc. Mass | mDa  | PPM  | DBE   | i-FIT | Norm | Conf (%) | Formula                           |  |
| 970.0291 | 970.0310   | -1.9 | -2.0 | 26.0  | 851.0 | n/a  | n/a      | C34 H22 N3 O3 P Cl<br>187Re 197Au |  |

**Figure S46.** HRMS (ES<sup>+</sup>) spectrum of **ReAu1**.

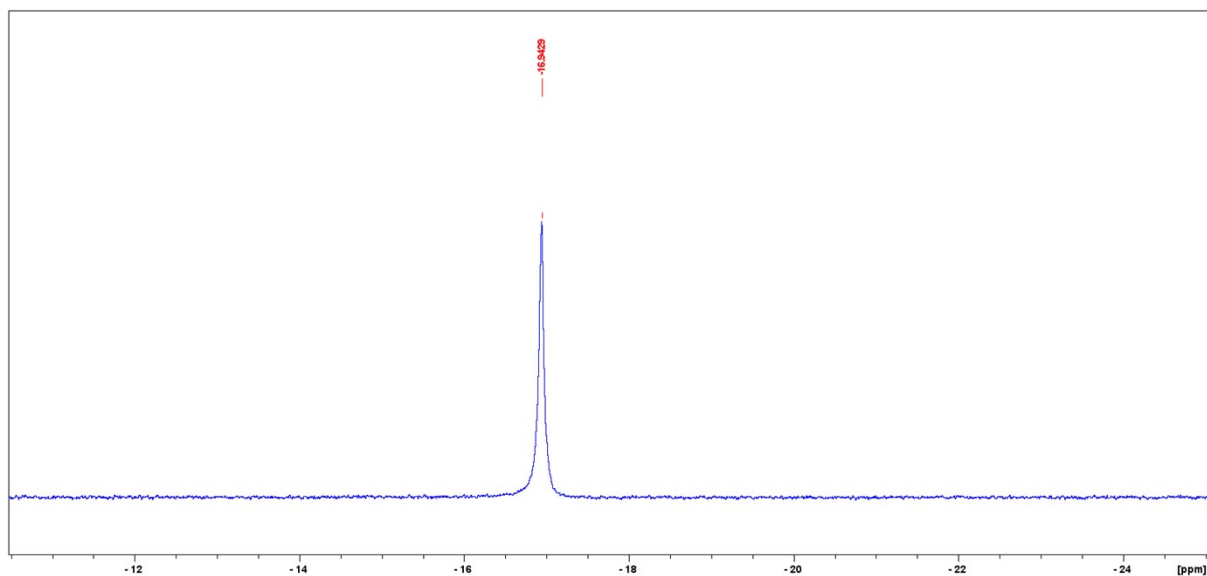

**Figure S47.** <sup>31</sup>P{<sup>1</sup>H} NMR spectrum of **ReL2** recorded at 162 MHz in d<sub>6</sub>-dms<sub>o</sub>.

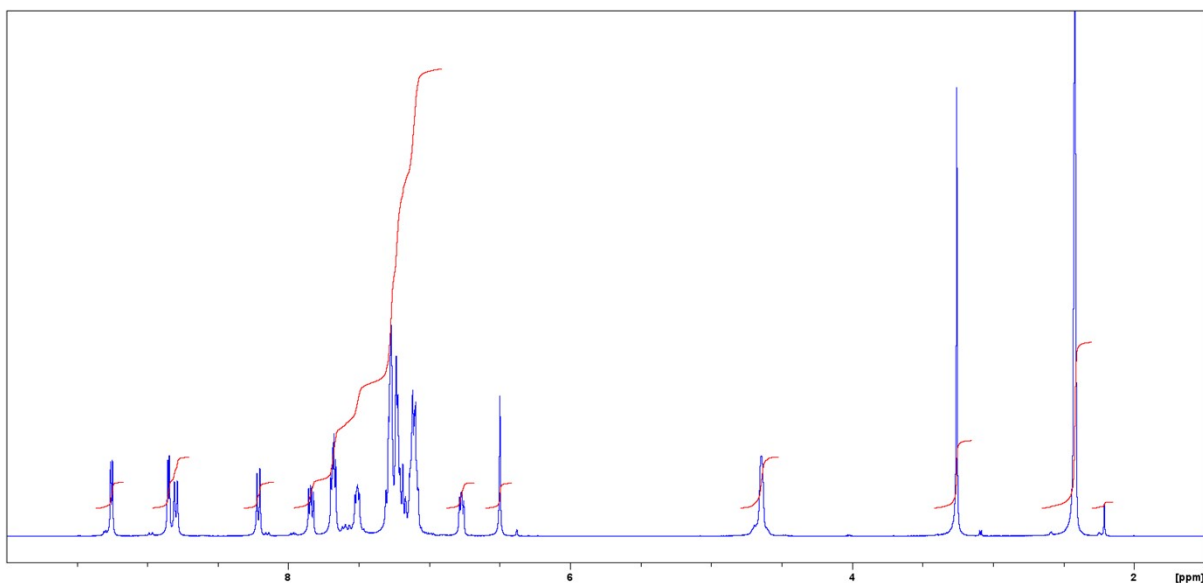

Figure S48.  $^1\text{H}$  NMR spectra of ReL2 recorded at 400 MHz in  $d_6$ -dmsO.

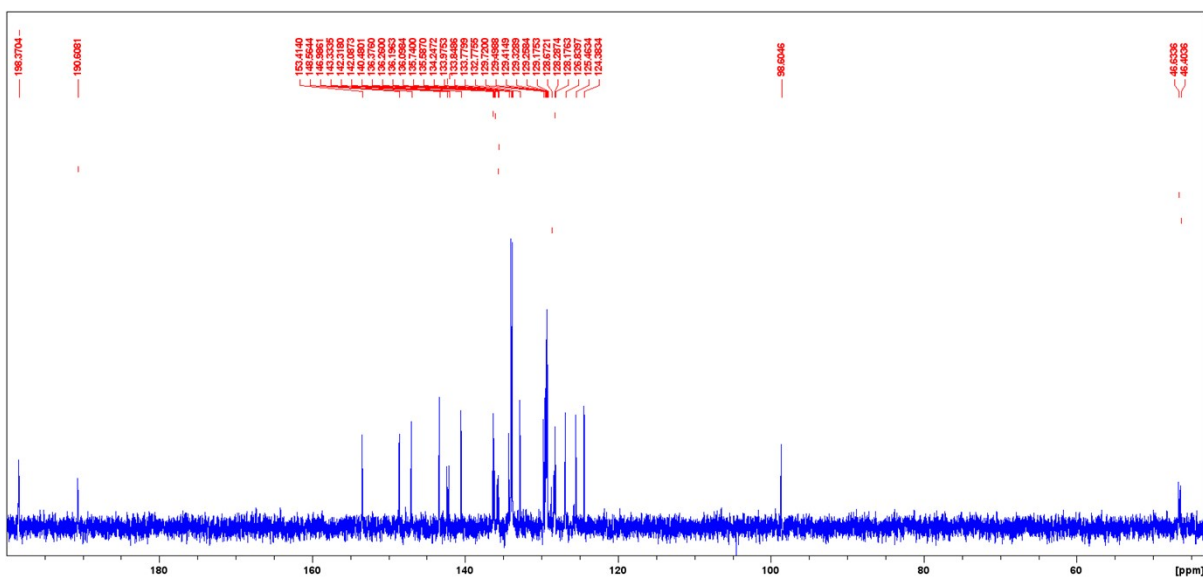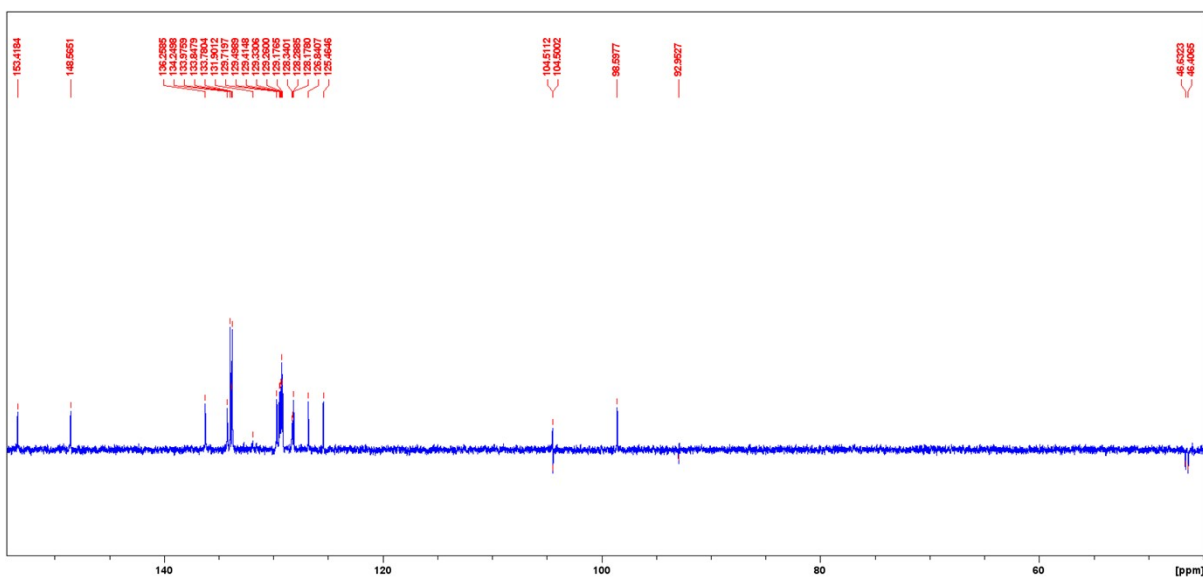

Figure S49.  $^{13}\text{C}\{^1\text{H}\}$  NMR spectra of ReL2 recorded at 75 MHz in  $d_6$ -dmsO.

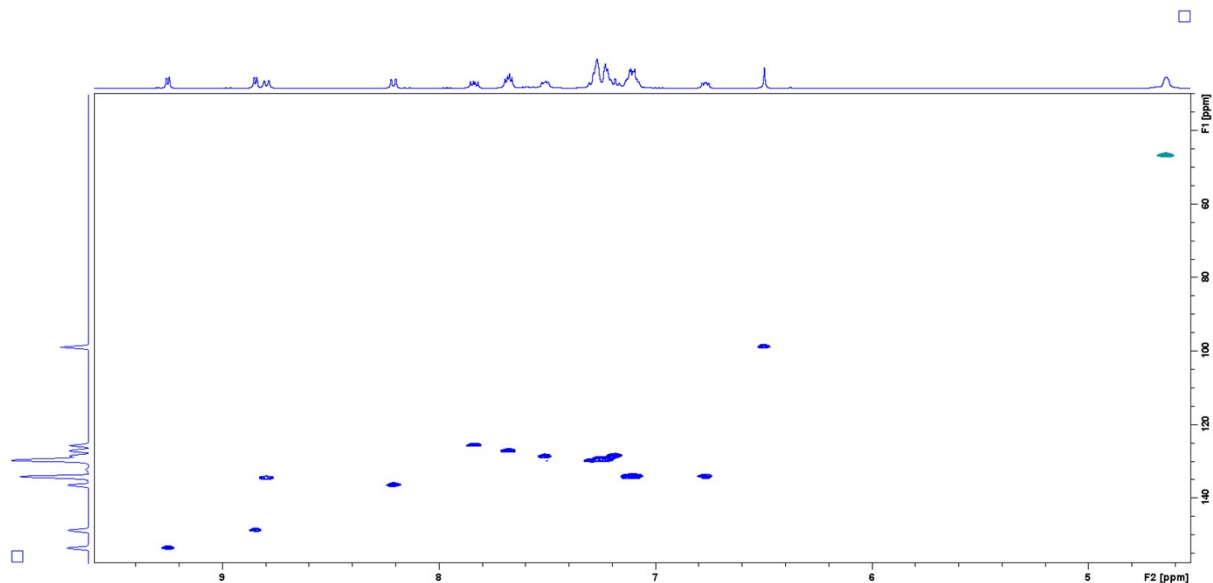

**Figure S50.**  $^1\text{H}$ - $^{13}\text{C}$  HSQC NMR spectrum of **ReL2** recorded in  $\text{d}_6$ - $\text{dmsO}$ .

25-Oct-2023

PDN\_MS48658\_ESP 11 (0.242) Cm (11-1)

RephenPR

XEVO-G2XSQTOF#NotSet  
Cardiff University  
1: TOF MS ES+  
2.44e6

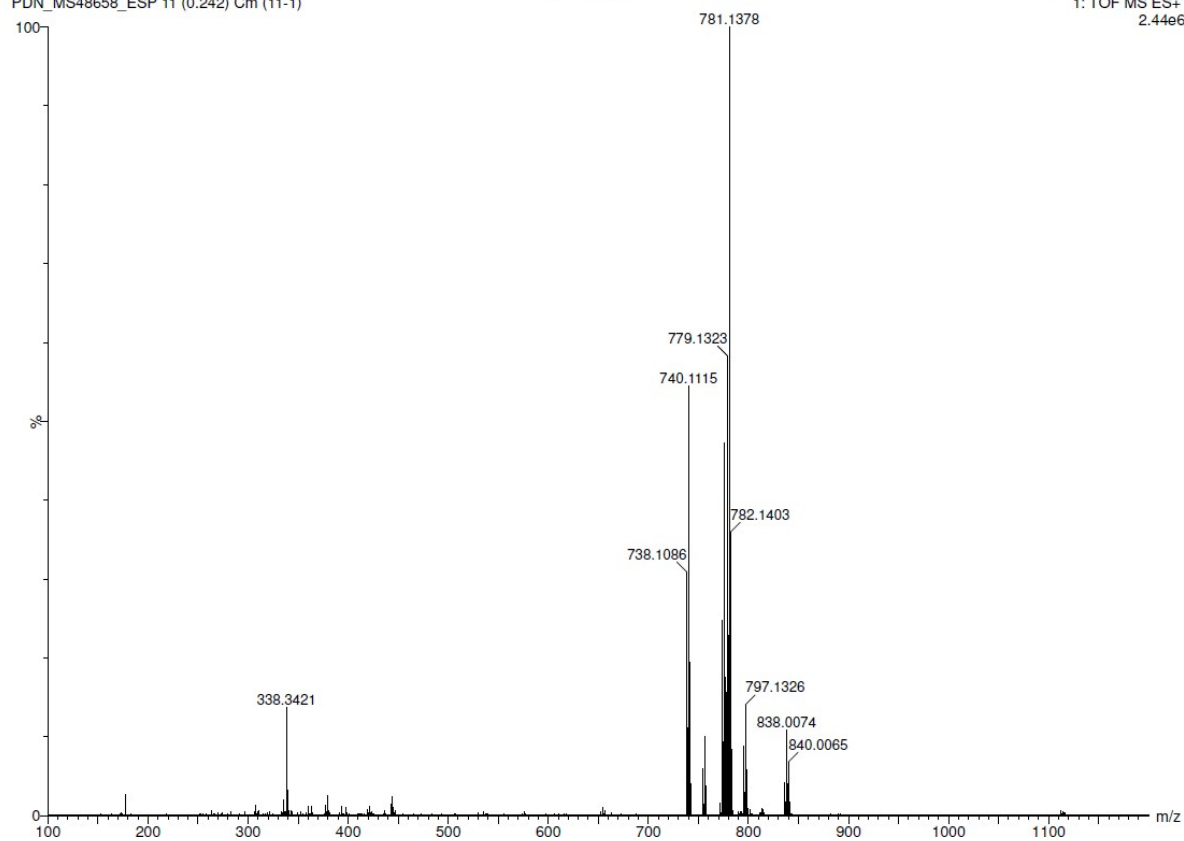

Minimum: -1.5  
Maximum: 5.0 10.0 50.0

| Mass     | Calc. Mass | mDa | PPM | DBE  | i-FIT | Norm | Conf (%) | Formula               |
|----------|------------|-----|-----|------|-------|------|----------|-----------------------|
| 740.1115 | 740.1113   | 0.2 | 0.3 | 25.0 | 949.0 | n/a  | n/a      | C34 H24 N3 O3 P 187Re |

**Figure S51.** HRMS ( $\text{ES}^+$ ) spectrum of **ReL2**.

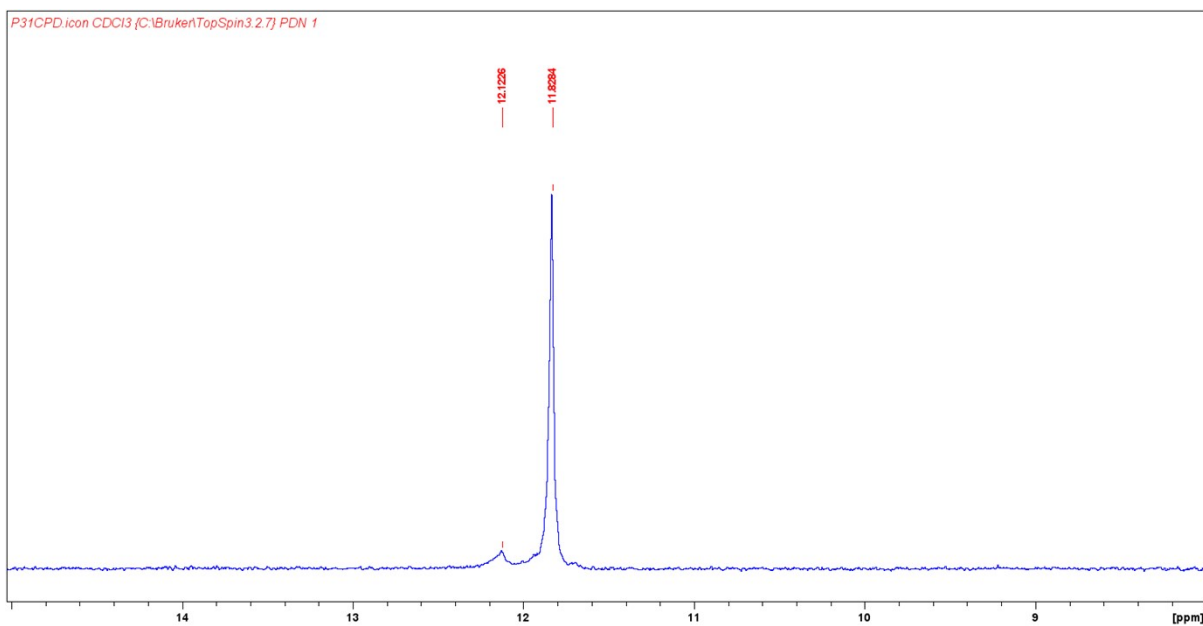

**Figure S52.**  $^{31}\text{P}\{^1\text{H}\}$  NMR spectrum of **2ReL2** recorded at 162 MHz in  $\text{CDCl}_3$ .

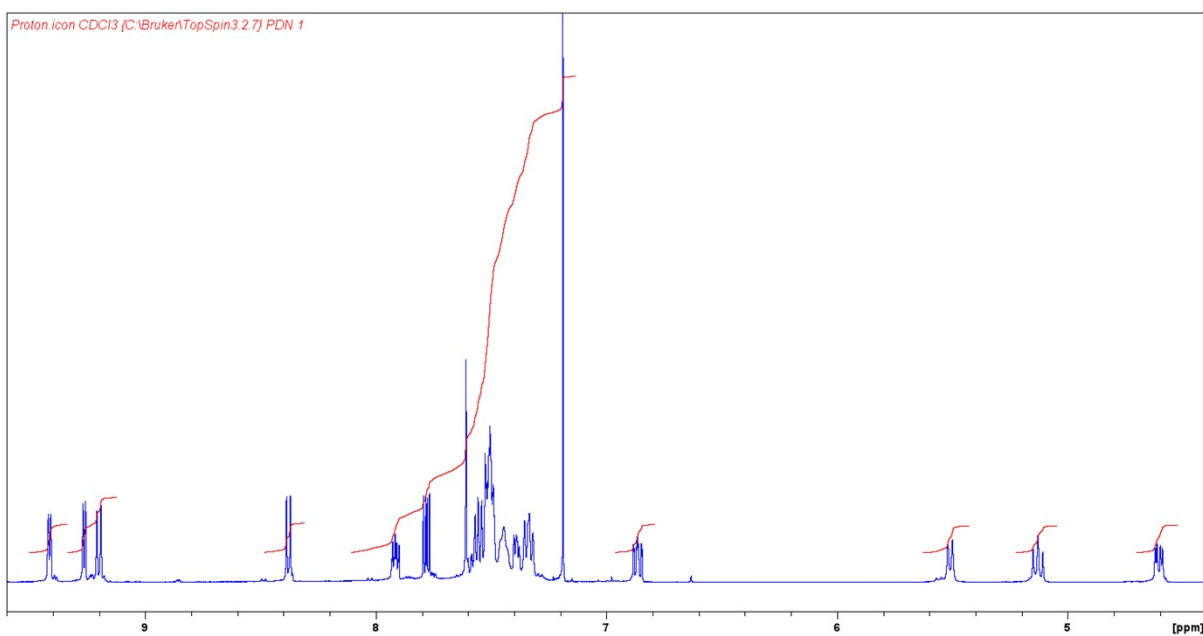

**Figure S53.**  $^1\text{H}$  NMR spectra of **2ReL2** recorded at 400 MHz in  $\text{CDCl}_3$ .

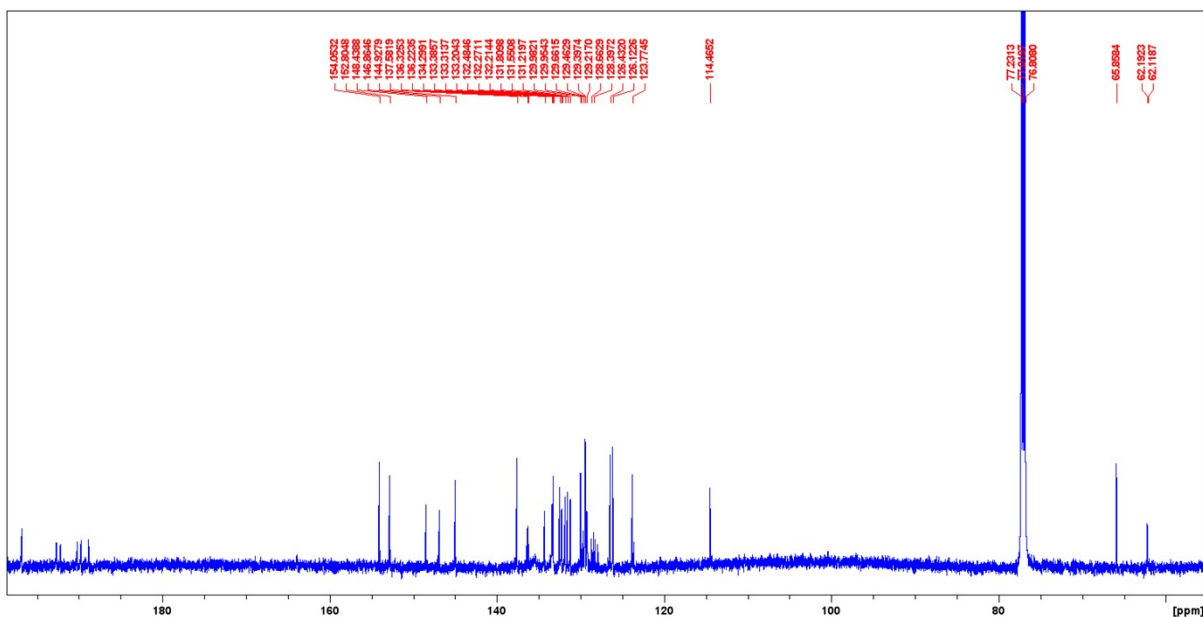

Figure S54.  $^{13}\text{C}\{^1\text{H}\}$  NMR spectrum of **2ReL2** recorded at 75 MHz in  $\text{CDCl}_3$ .

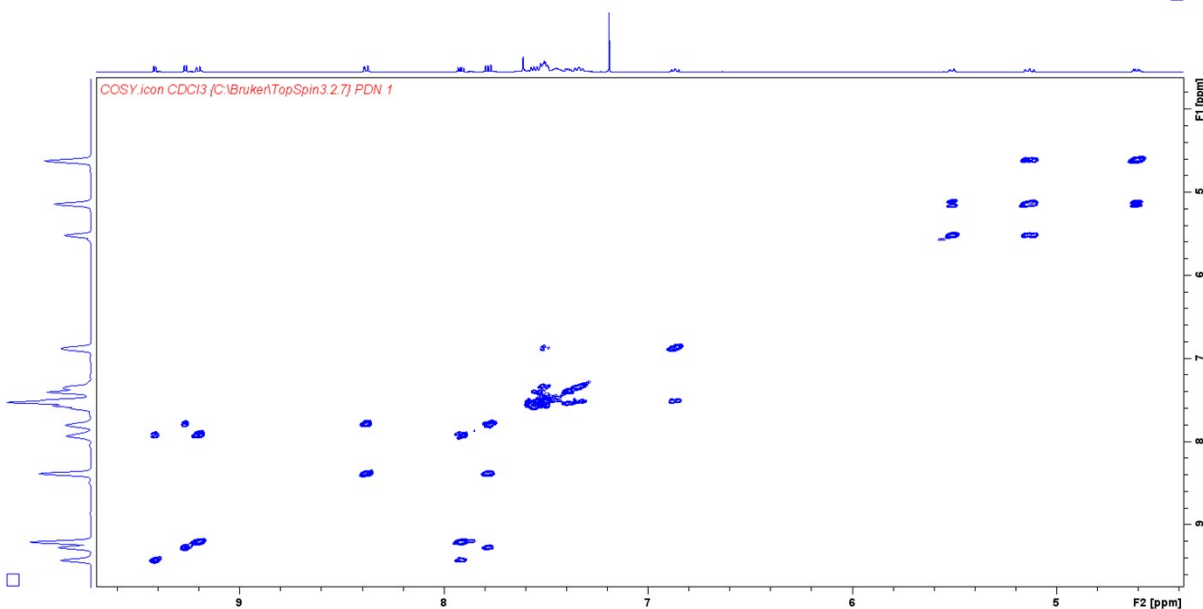

Figure S55.  $^1\text{H}$ - $^1\text{H}$  COSY NMR spectrum of **2ReL2** recorded at 400 MHz in  $\text{CDCl}_3$ .

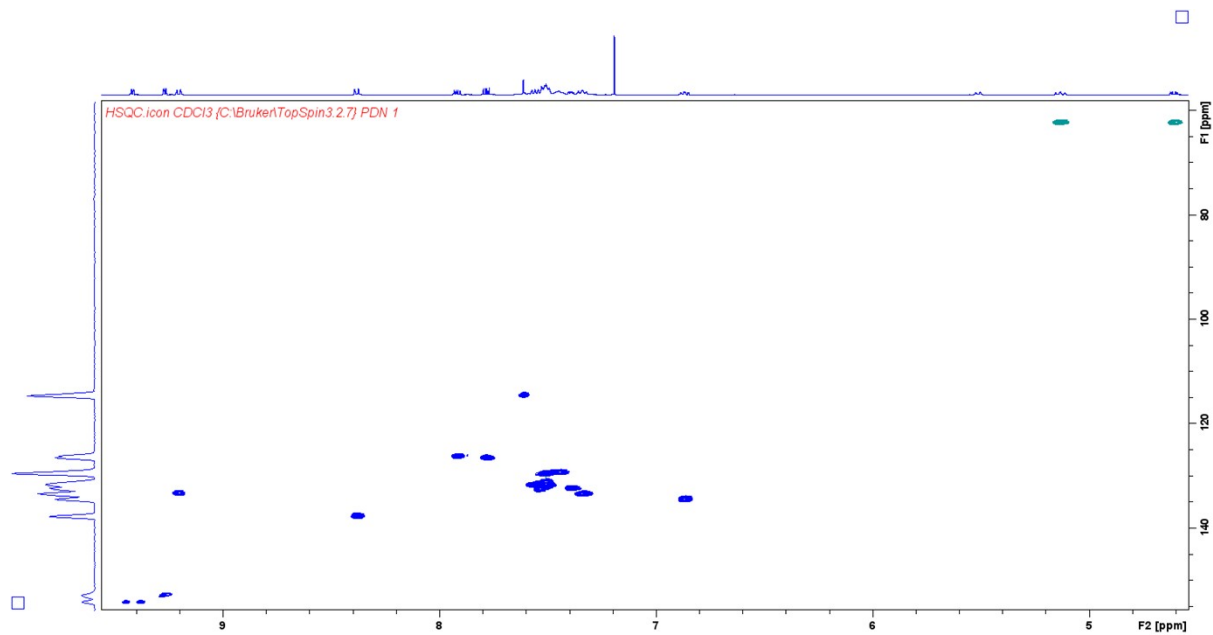

Figure S56. <sup>1</sup>H-<sup>13</sup>C HSQC NMR spectrum of **2ReL2** recorded in CDCl<sub>3</sub>.

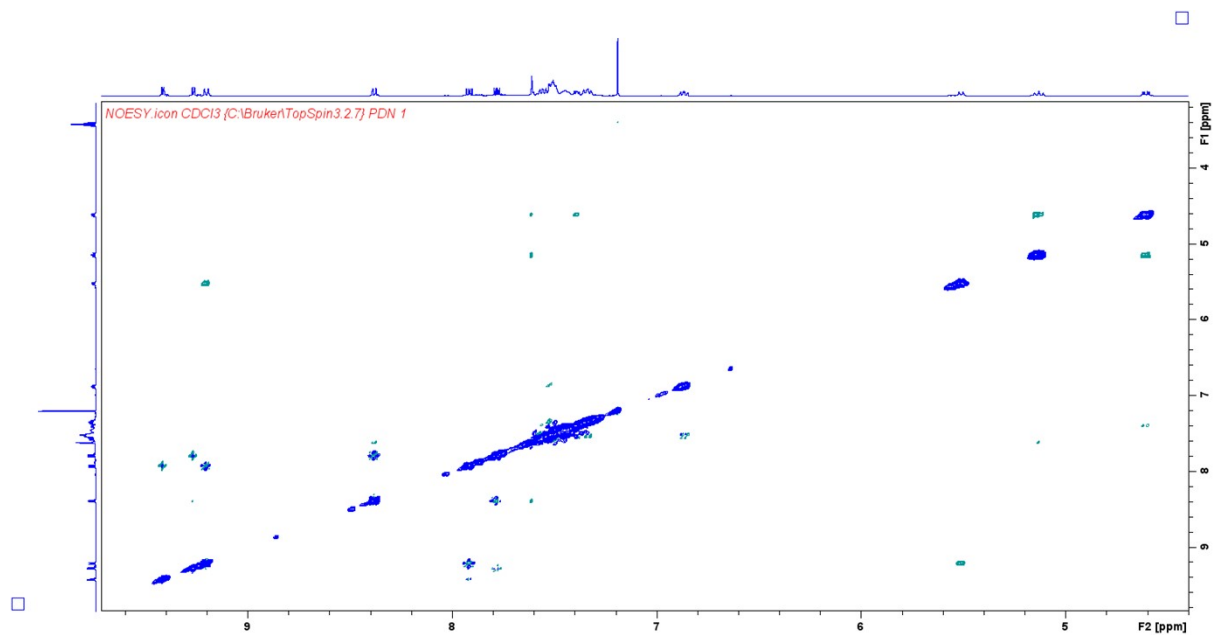

Figure S57. <sup>1</sup>H-<sup>1</sup>H NOESY NMR spectrum of **2ReL2** recorded at 400 MHz in CDCl<sub>3</sub>.



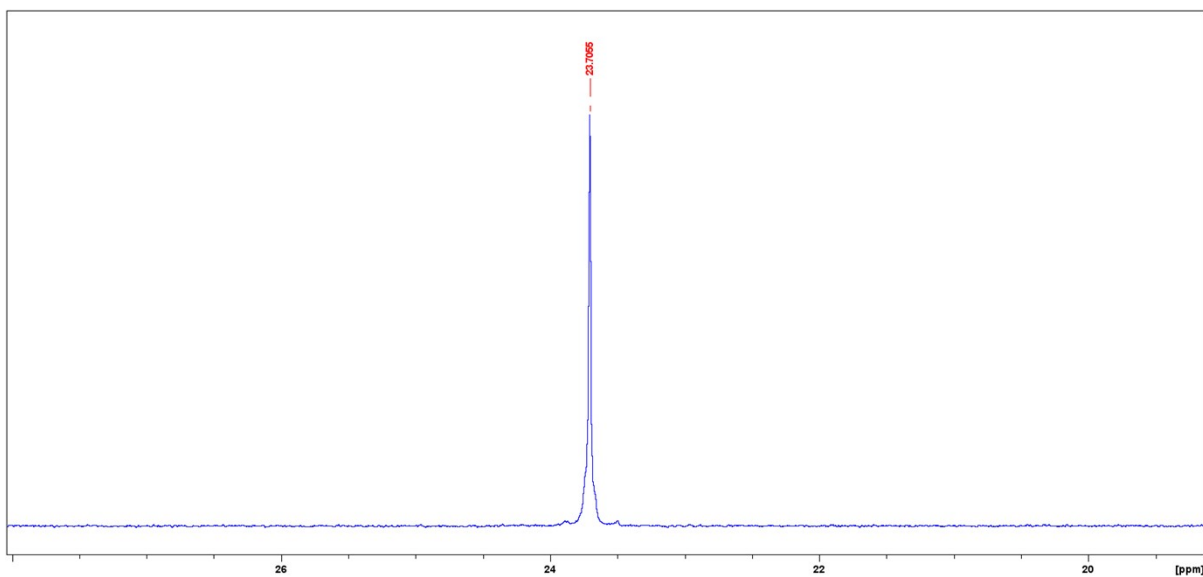

**Figure S58.**  $^{31}\text{P}\{^1\text{H}\}$  NMR spectrum of **ReAuL2** recorded at 162 MHz in  $\text{CDCl}_3$ .

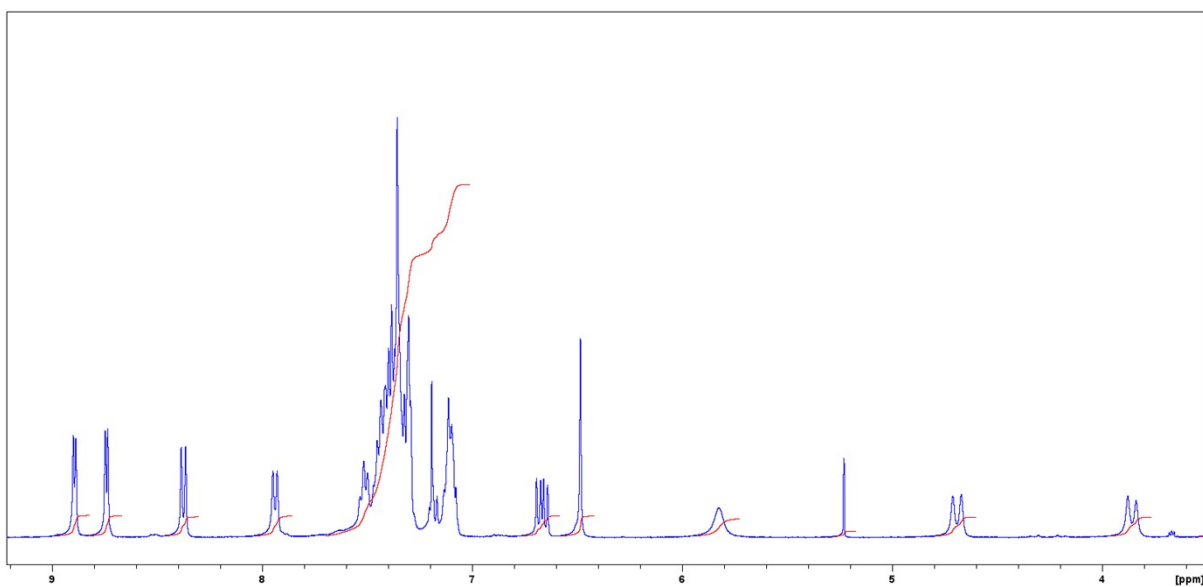

**Figure S59.**  $^1\text{H}$  NMR spectra of **ReAuL2** recorded at 400 MHz in  $\text{CDCl}_3$ .

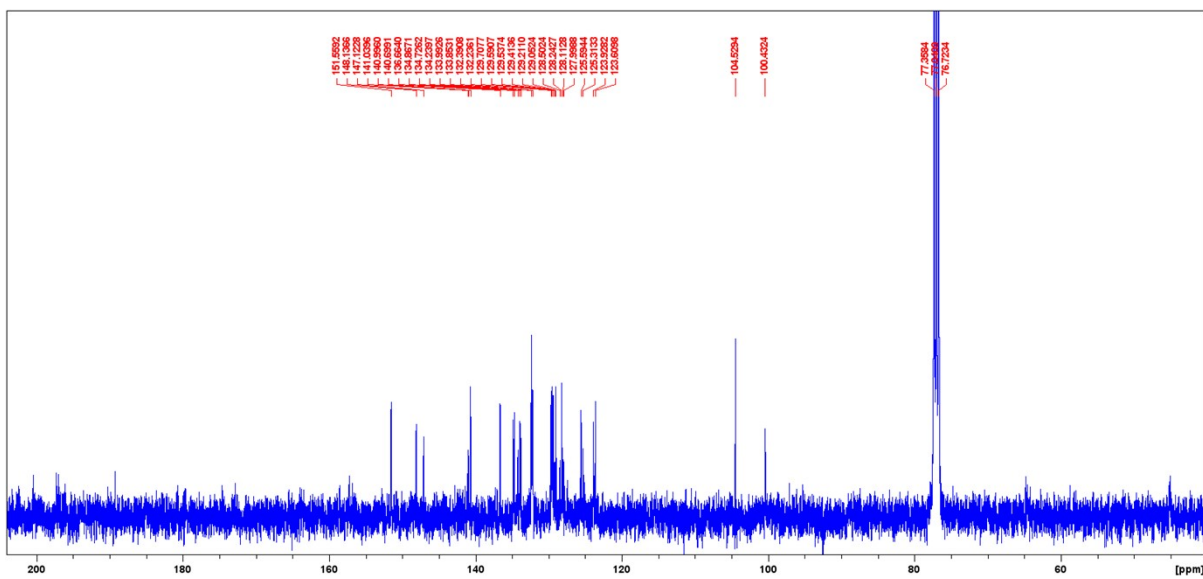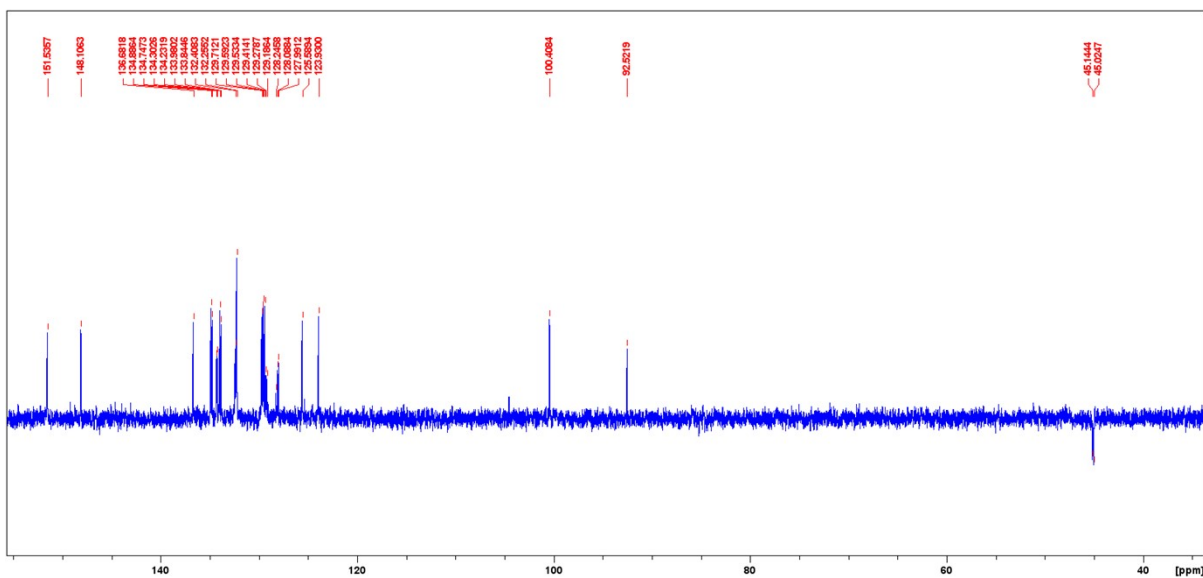

Figure S60.  $^{13}\text{C}\{^1\text{H}\}$  NMR spectrum of **ReAuL2** recorded at 75 MHz in  $\text{CDCl}_3$ .

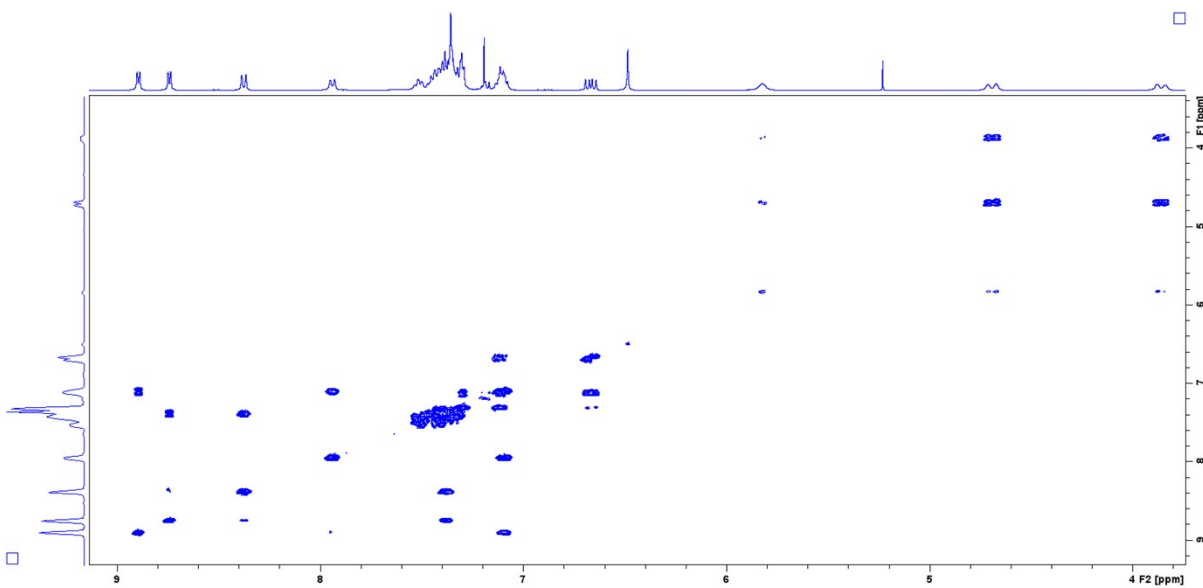

Figure S61.  $^1\text{H}$ - $^1\text{H}$  COSY NMR spectrum of **ReAuL2** recorded at 400 MHz in  $\text{CDCl}_3$ .

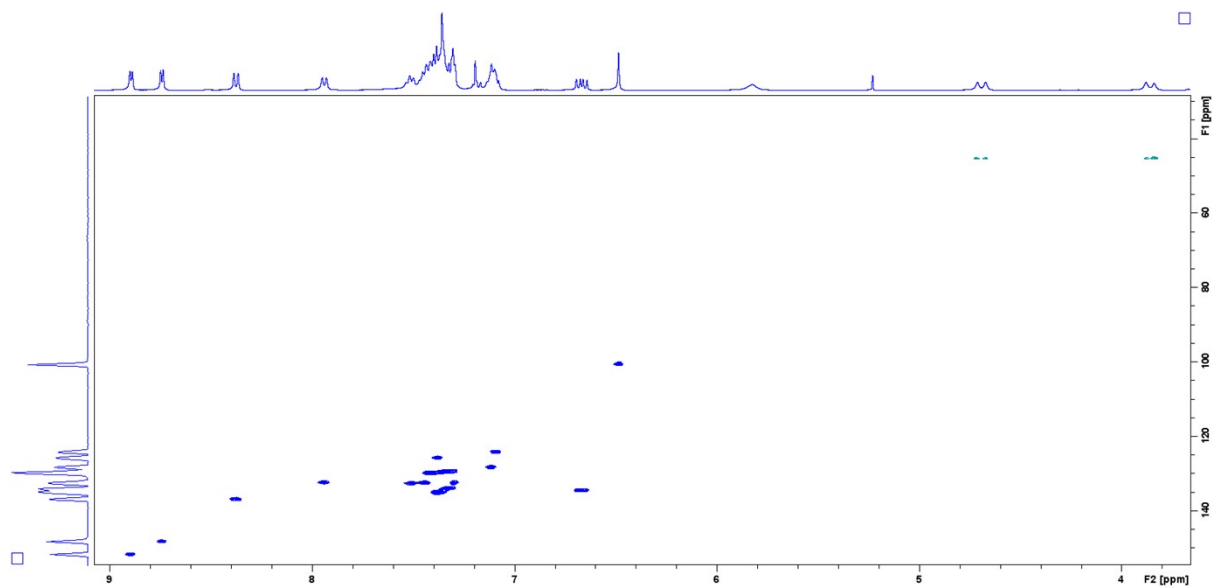

Figure S62.  $^1\text{H}$ - $^{13}\text{C}$  HSQC NMR spectrum of **ReAuL2** recorded in  $\text{CDCl}_3$ .

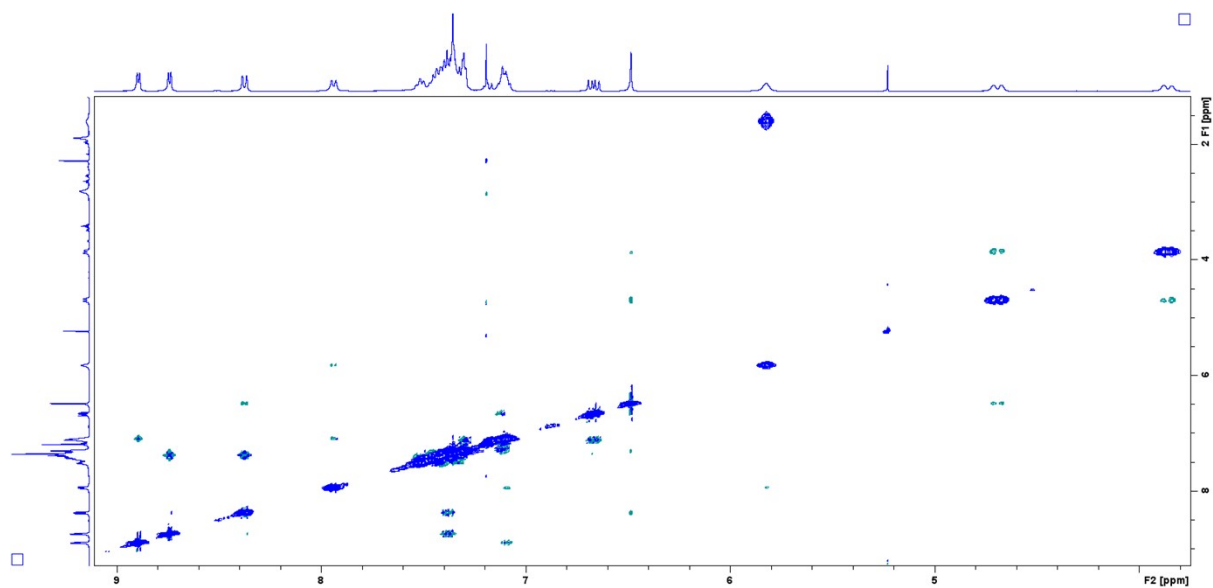

Figure S63.  $^1\text{H}$ - $^1\text{H}$  NOESY NMR spectrum of **ReAuL2** recorded at 400 MHz in  $\text{CDCl}_3$ .

31-Oct-2023

ReAuL2

XEVO-G2XSQTOF#NotSet  
Cardiff University  
1: TOF MS ES+  
2.13e7

PDN\_MS48706\_ESP 15 (0.310)

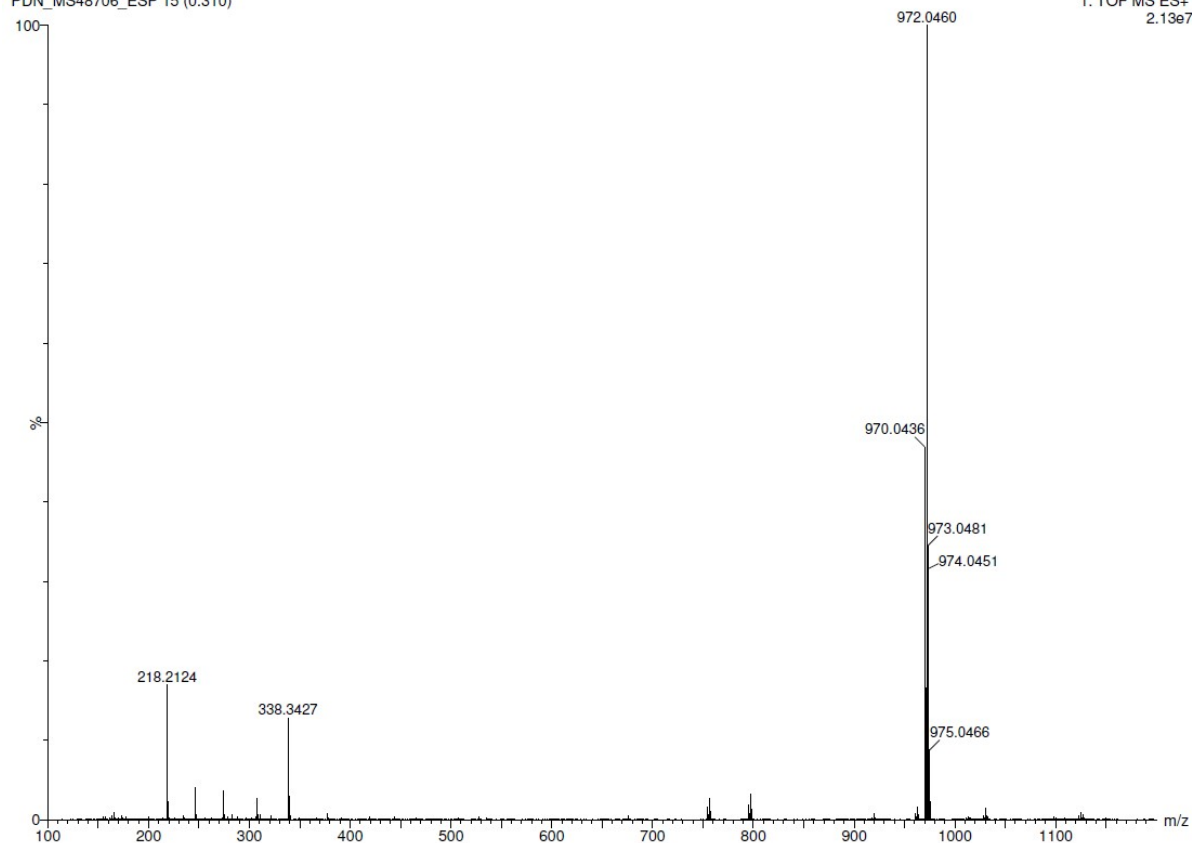

Minimum: -1.5  
Maximum: 5.0 10.0 50.0

| Mass     | Calc. Mass | mDa  | PPM  | DBE  | i-FIT | Norm | Conf (%) | Formula                        |
|----------|------------|------|------|------|-------|------|----------|--------------------------------|
| 972.0460 | 972.0467   | -0.7 | -0.7 | 25.0 | 952.5 | n/a  | n/a      | C34 H24 N3 O3 P Cl 187Re 197Au |

**Figure S64.** HRMS (ES<sup>+</sup>) spectrum of ReAuL2.

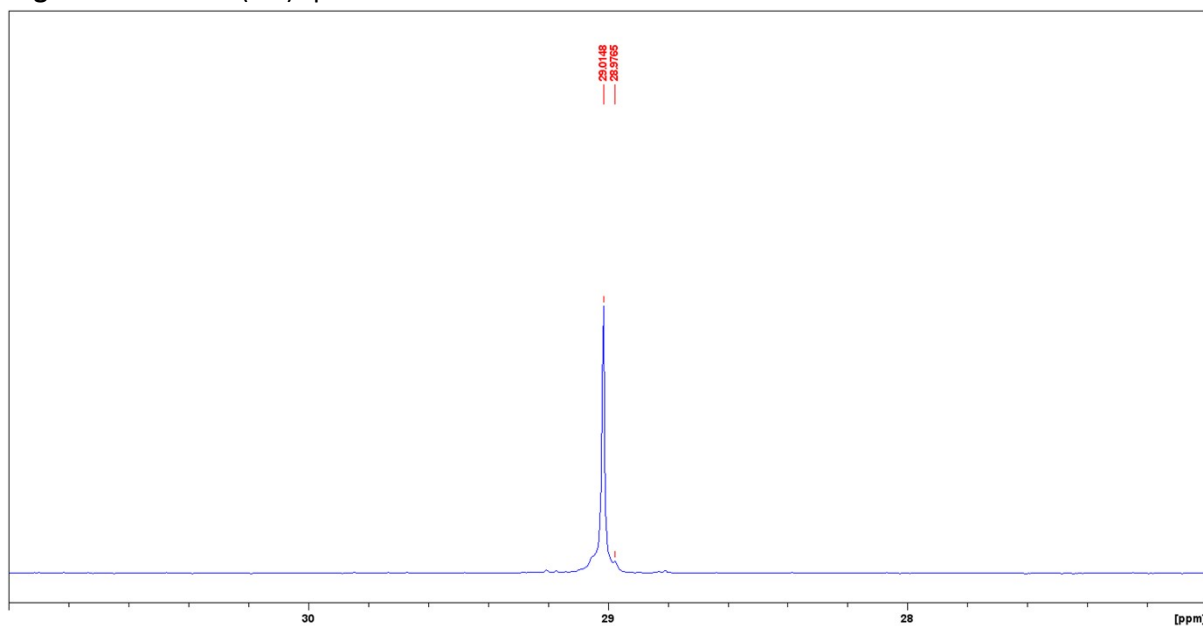

**Figure S65.** <sup>31</sup>P{<sup>1</sup>H} NMR spectrum of AuL1 recorded at 162 MHz in CDCl<sub>3</sub>.

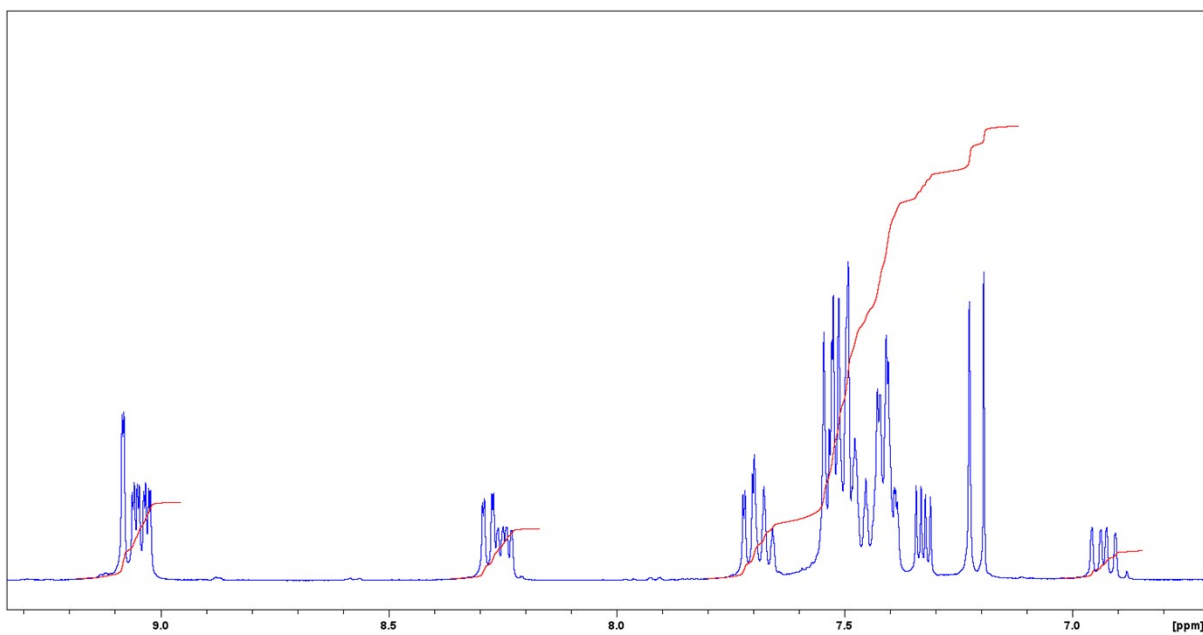

**Figure S66.**  $^1\text{H}$  NMR spectra of **AuL1** recorded at 400 MHz in  $\text{CDCl}_3$ .

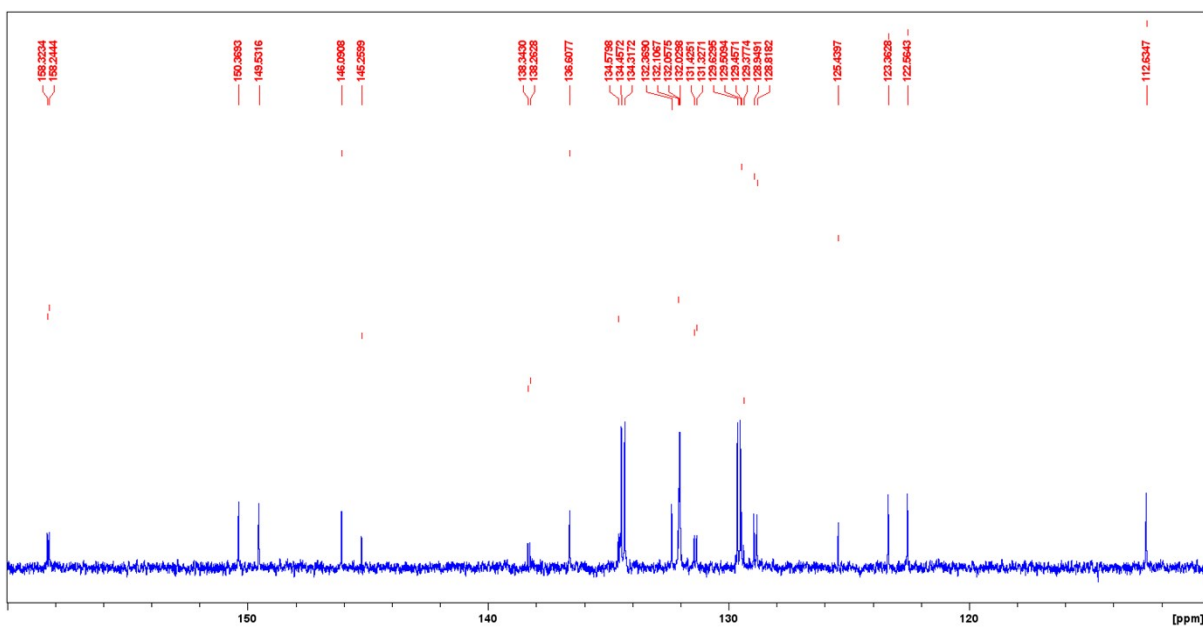

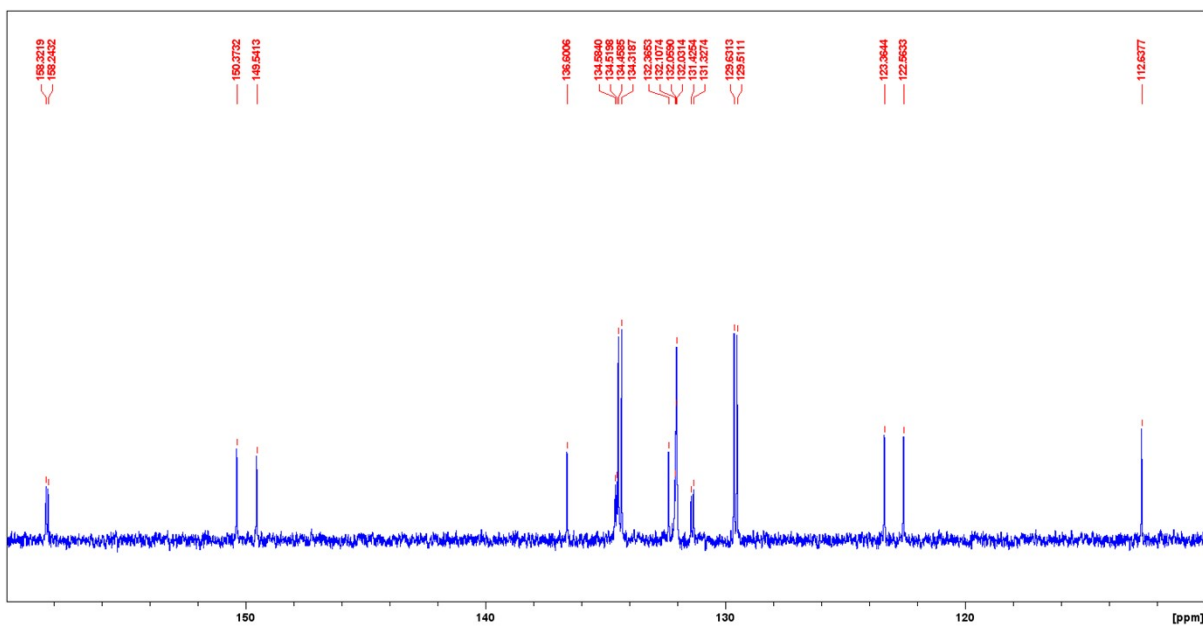

**Figure S67.**  $^{13}\text{C}\{^1\text{H}\}$  NMR spectra of **AuL1** recorded at 75 MHz in  $\text{CDCl}_3$ .

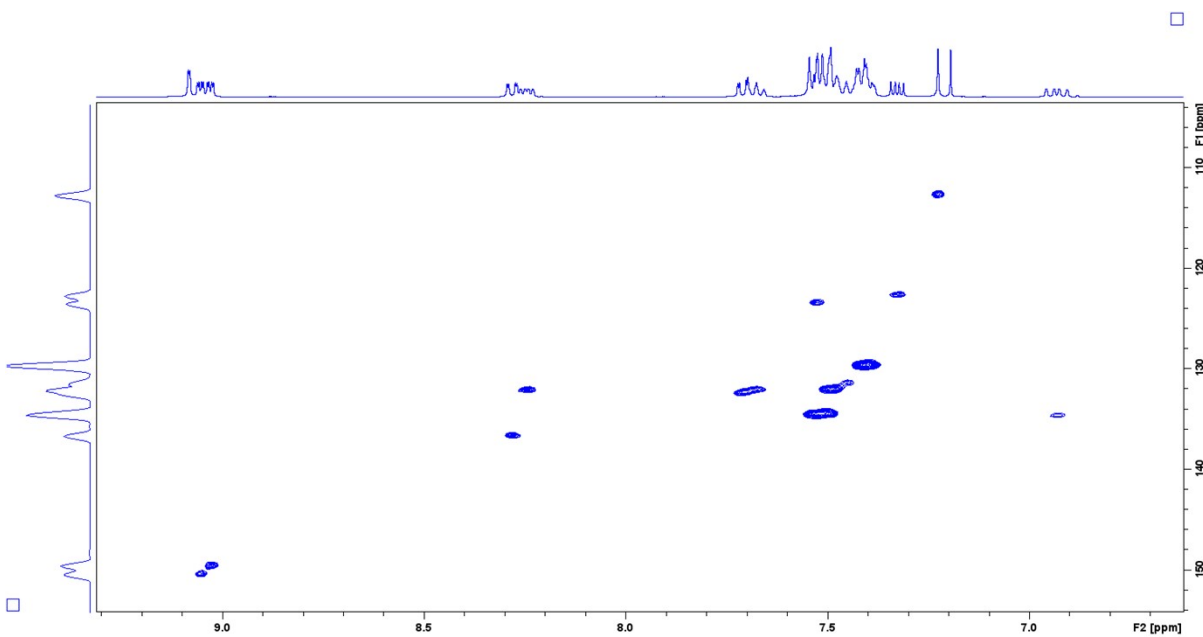

**Figure S68.**  $^1\text{H}$ - $^{13}\text{C}$  HSQC NMR spectrum of **AuL1** recorded in  $\text{CDCl}_3$ .

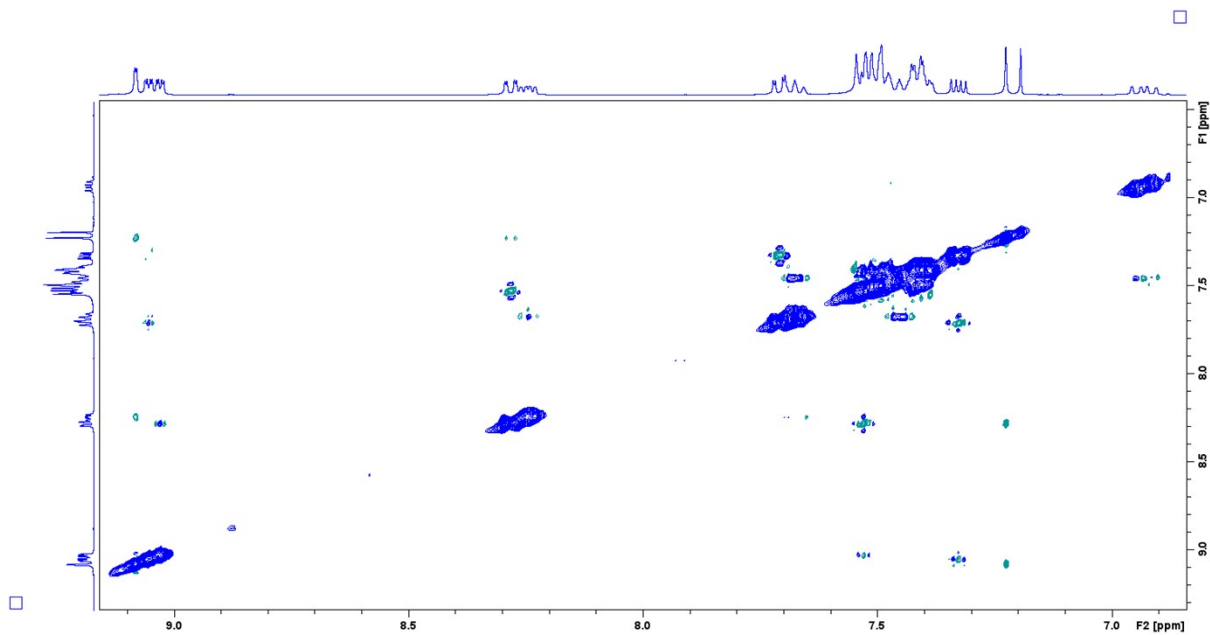

**Figure S69.**  $^1\text{H}$ - $^1\text{H}$  NOESY NMR spectrum of **AuL1** recorded at 400 MHz in  $\text{CDCl}_3$ .

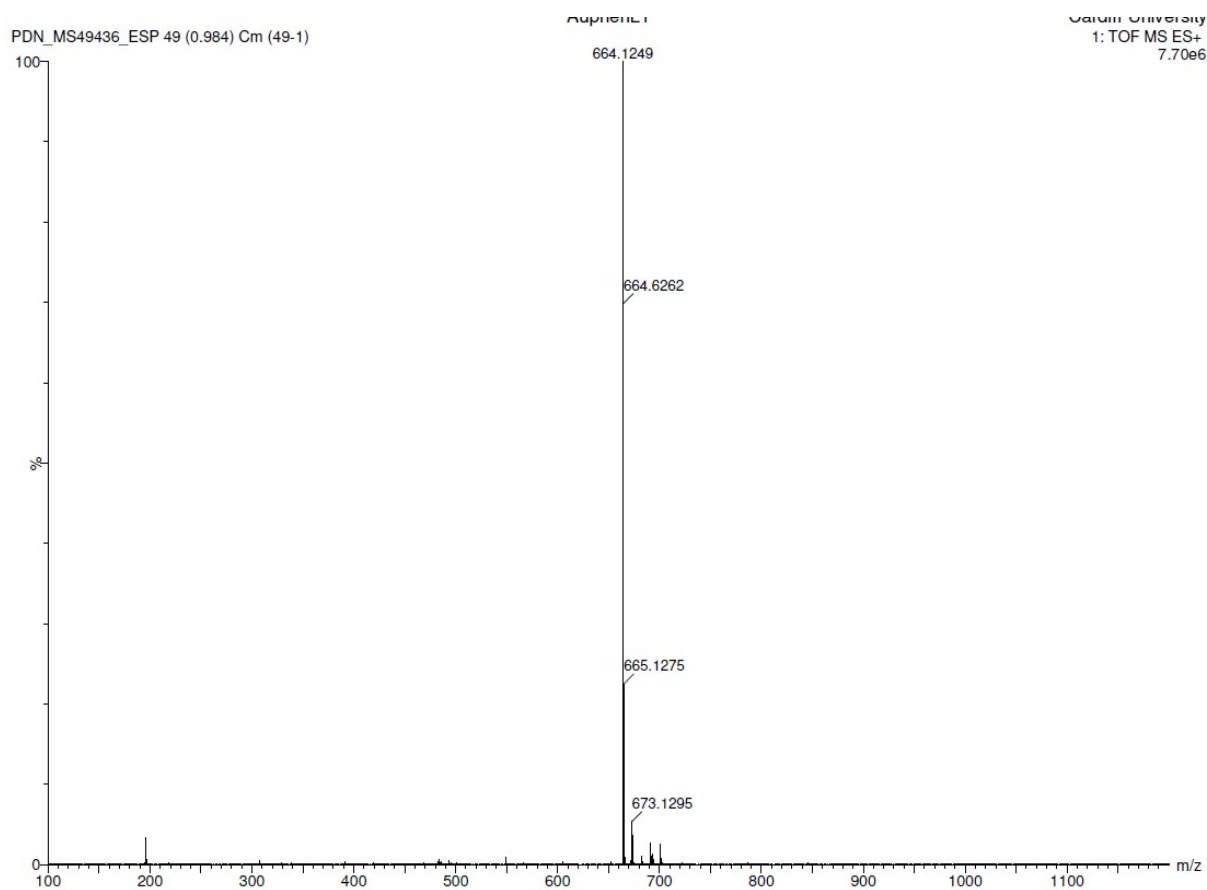

Minimum: -1.5  
 Maximum: 5.0 10.0 50.0

| Mass     | Calc. Mass | mDa | PPM | DBE  | i-FIT  | Norm | Conf (%) | Formula                                           |
|----------|------------|-----|-----|------|--------|------|----------|---------------------------------------------------|
| 664.1249 | 664.1217   | 3.2 | 4.8 | 23.5 | 1126.4 | n/a  | n/a      | $\text{C}_{31}\text{H}_{22}\text{N}_3\text{P Au}$ |

**Figure S70.** HRMS ( $\text{ES}^+$ ) spectrum of **AuL1**.

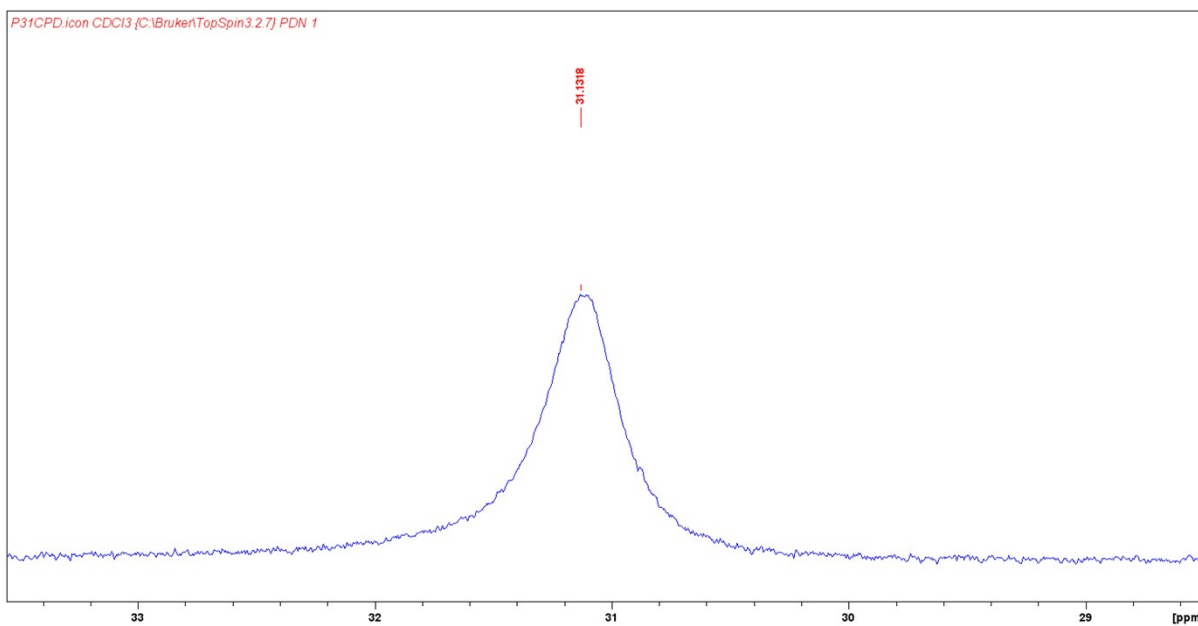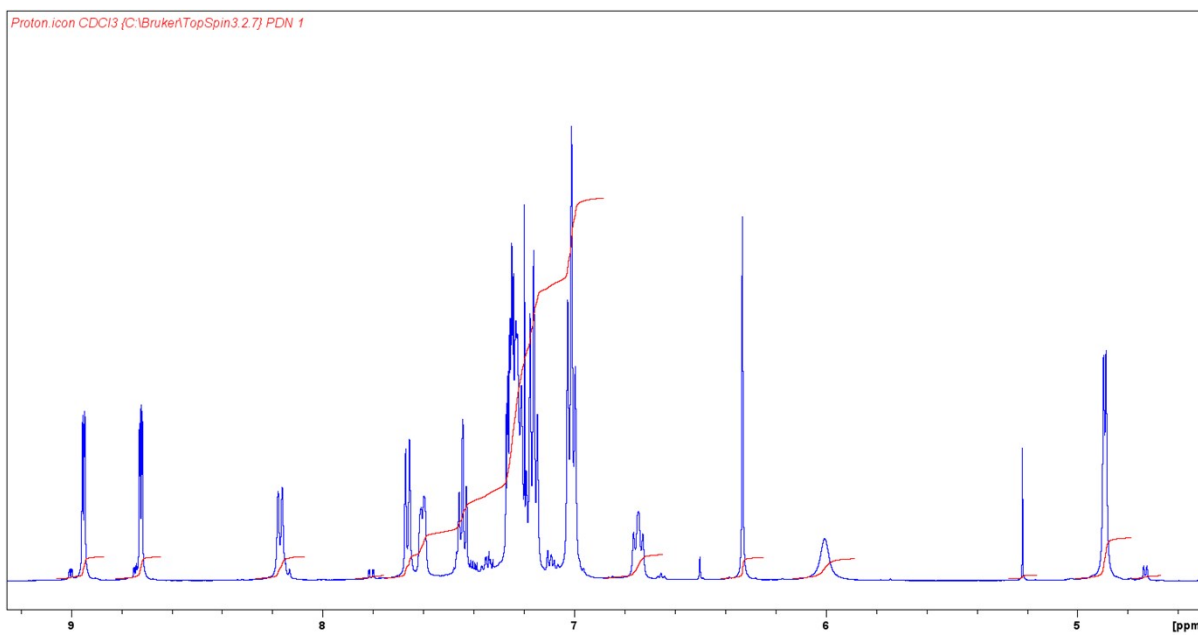



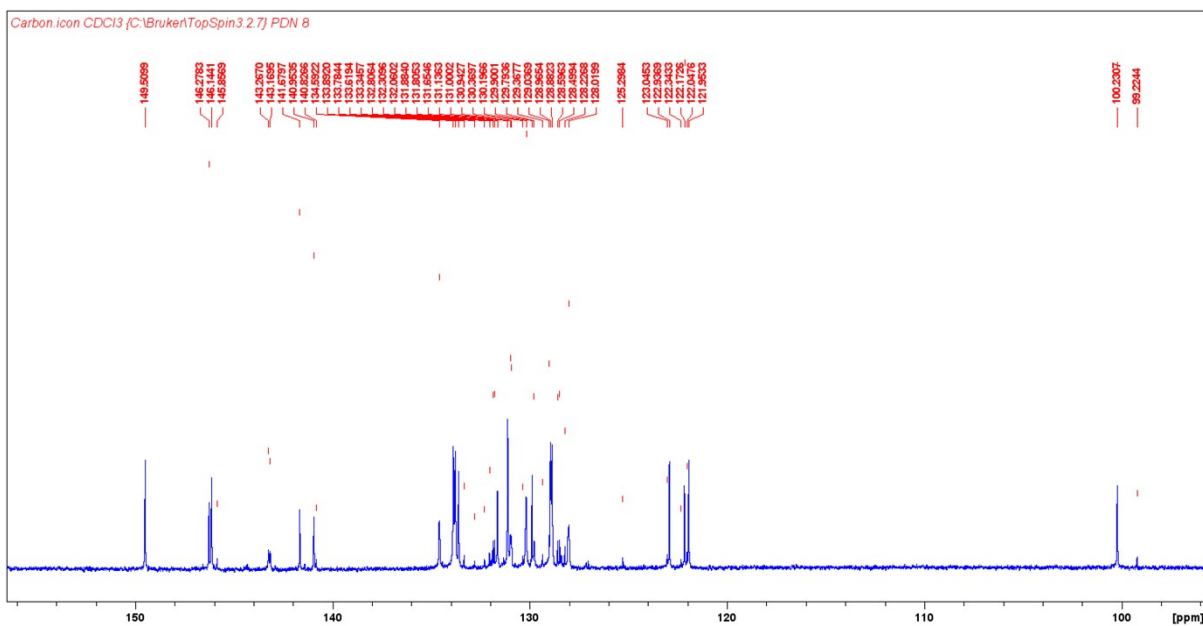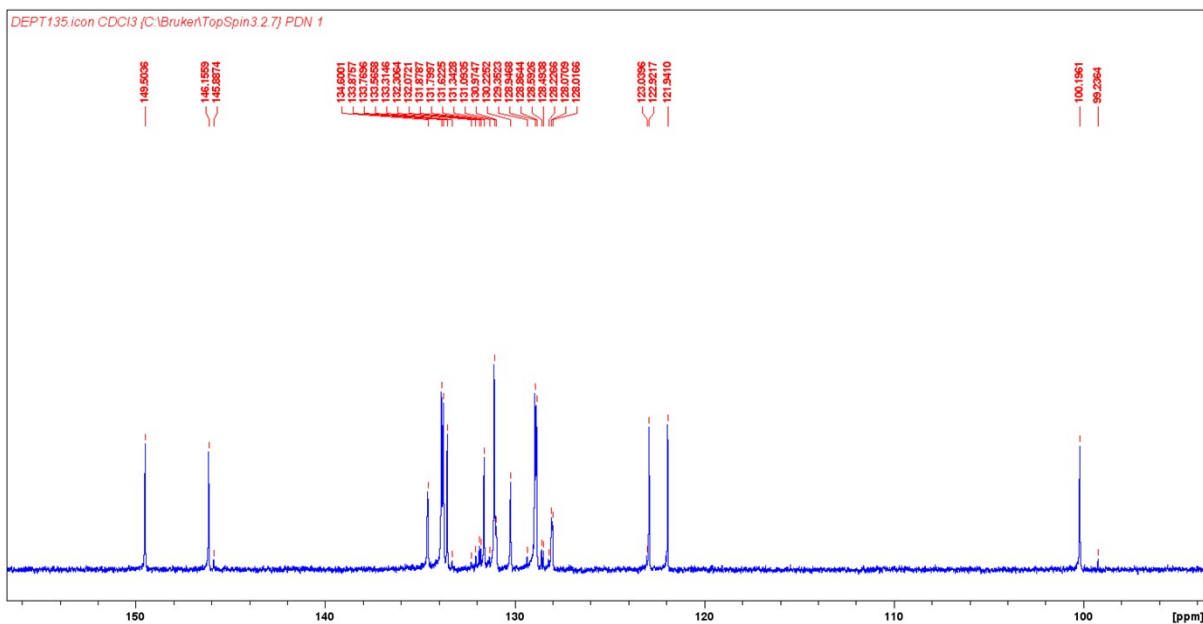

Figure S73. <sup>13</sup>C{<sup>1</sup>H} NMR spectra of AuL2 recorded at 75 MHz in CDCl<sub>3</sub>.

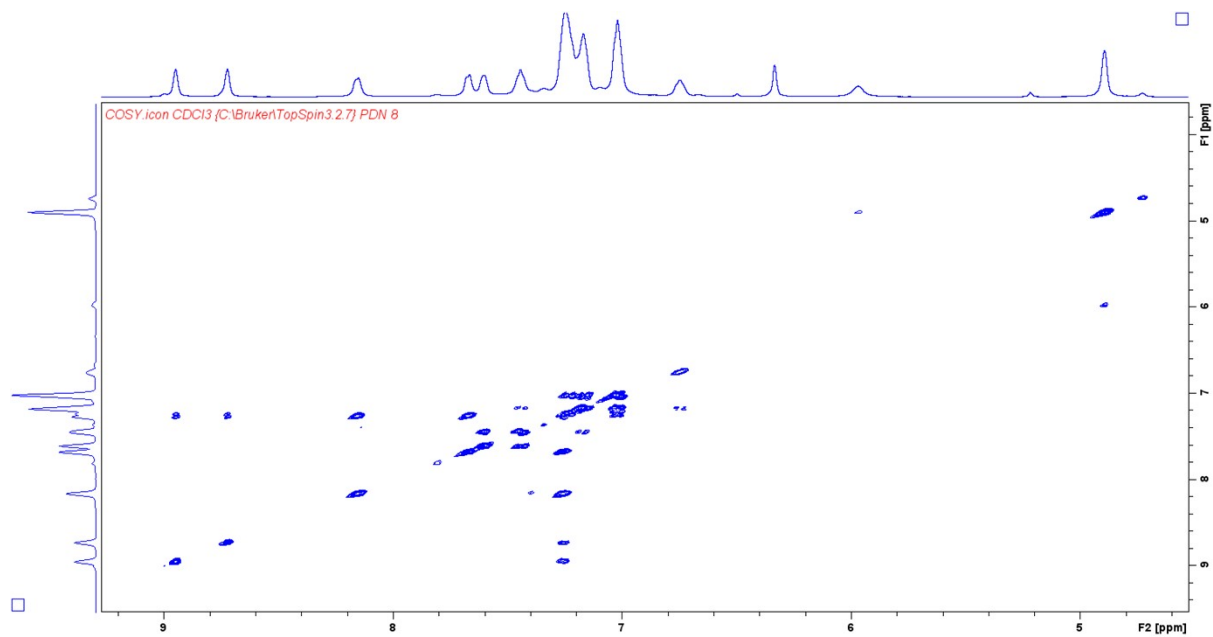

**Figure S74.**  $^1\text{H}$ - $^1\text{H}$  COSY NMR spectrum of **AuL2** recorded at 400 MHz in  $\text{CDCl}_3$ .

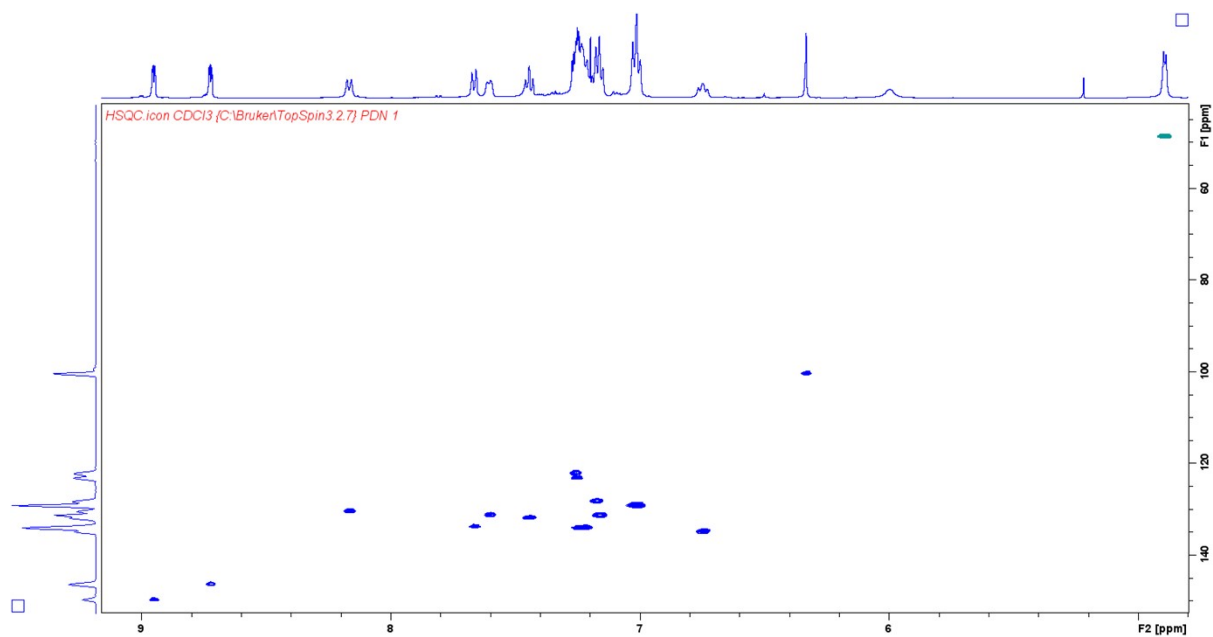

**Figure S75.**  $^1\text{H}$ - $^{13}\text{C}$  HSQC NMR spectrum of **AuL2** recorded in  $\text{CDCl}_3$ .

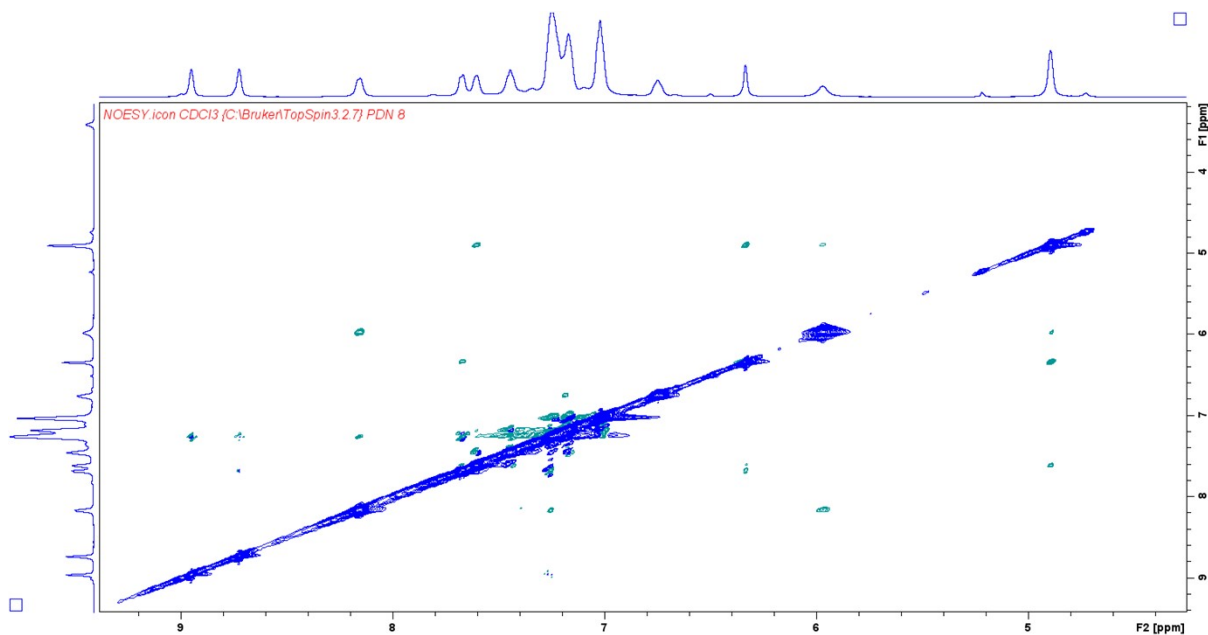

**Figure S76.**  $^1\text{H}$ - $^1\text{H}$  NOESY NMR spectrum of **AuL2** recorded at 400 MHz in  $\text{CDCl}_3$ .

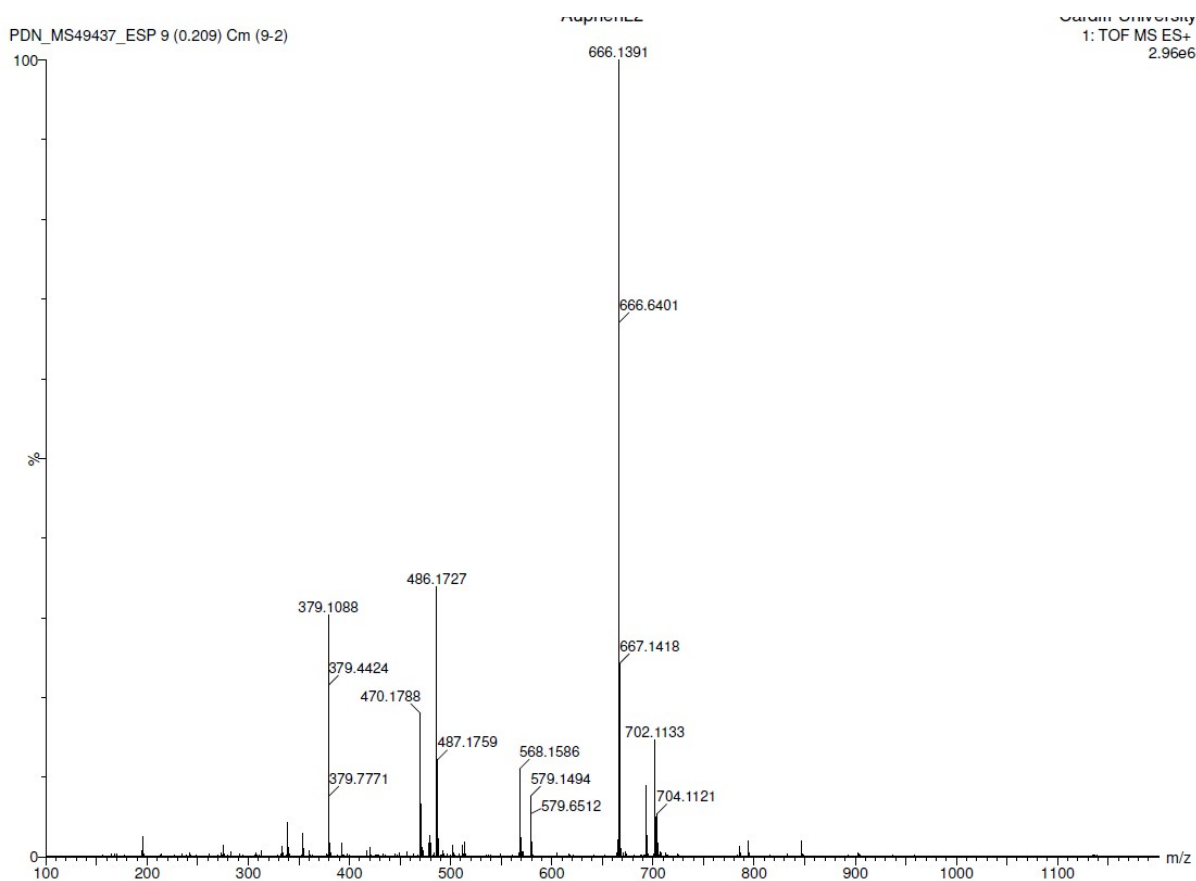

| Mass     | Calc. Mass | mDa | PPM | DBE  | i-FIT  | Norm | Conf (%) | Formula                                           |
|----------|------------|-----|-----|------|--------|------|----------|---------------------------------------------------|
| 666.1391 | 666.1373   | 1.8 | 2.7 | 22.5 | 1102.9 | n/a  | n/a      | $\text{C}_{31}\text{H}_{24}\text{N}_3\text{P Au}$ |

**Figure S77.** HRMS ( $\text{ES}^+$ ) spectrum of **AuL2**.

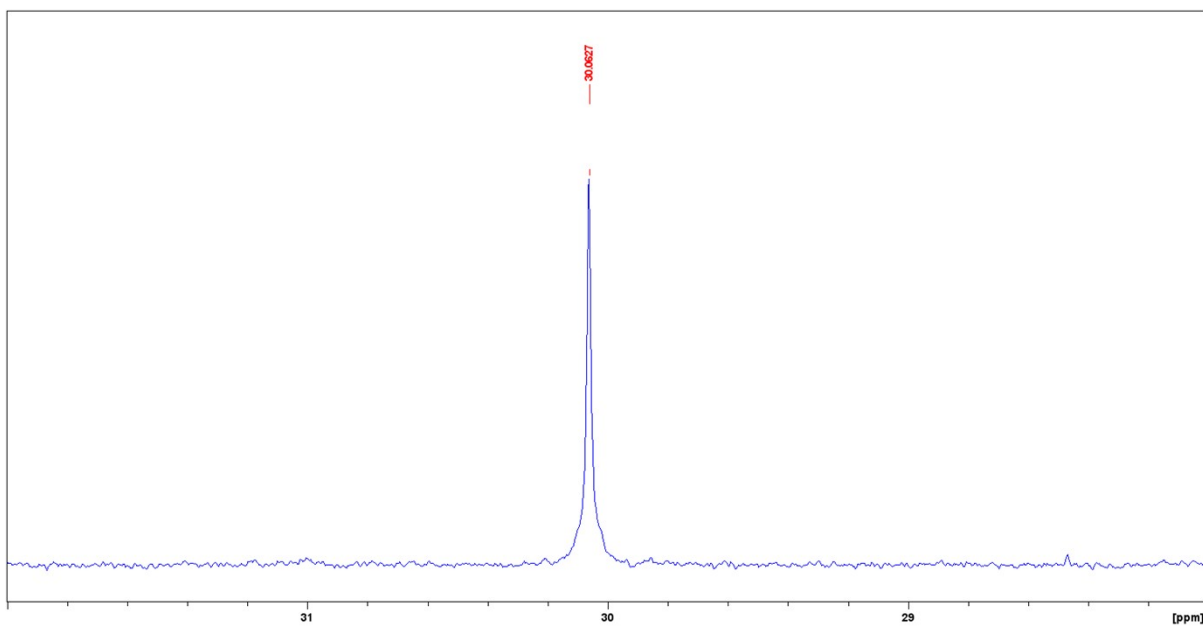

**Figure S78.**  $^{31}\text{P}\{^1\text{H}\}$  NMR spectrum of IrAuL1 recorded at 162 MHz in  $\text{d}_6$ -acetone.

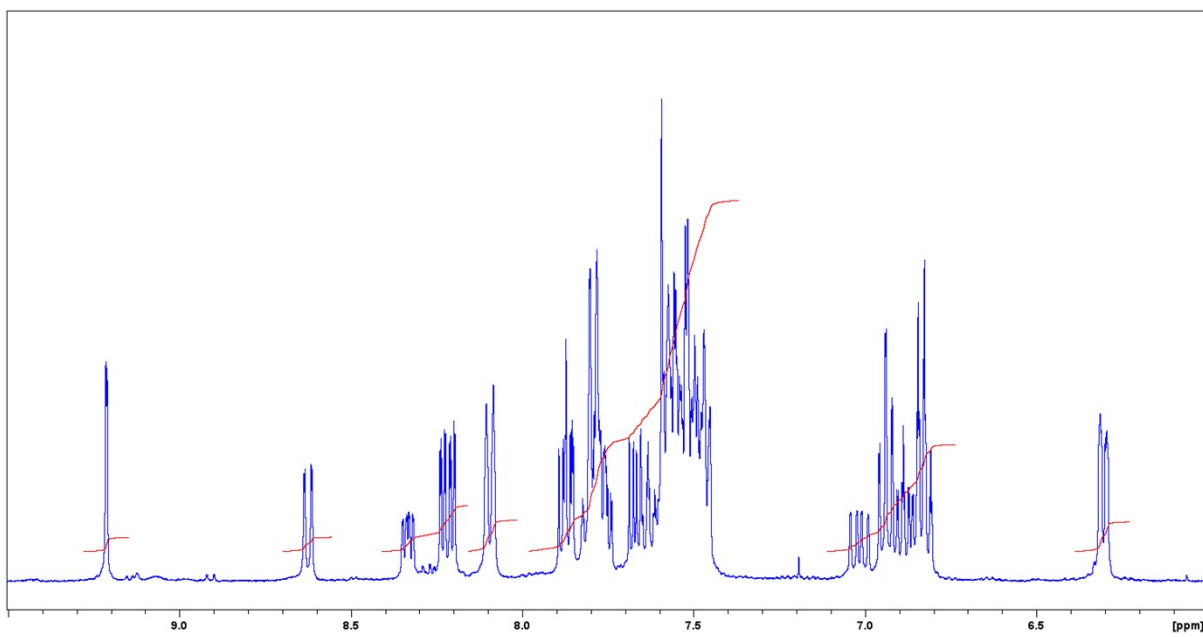

**Figure S79.**  $^1\text{H}$  NMR spectra of IrAuL1 recorded at 400 MHz in  $\text{d}_6$ -acetone.

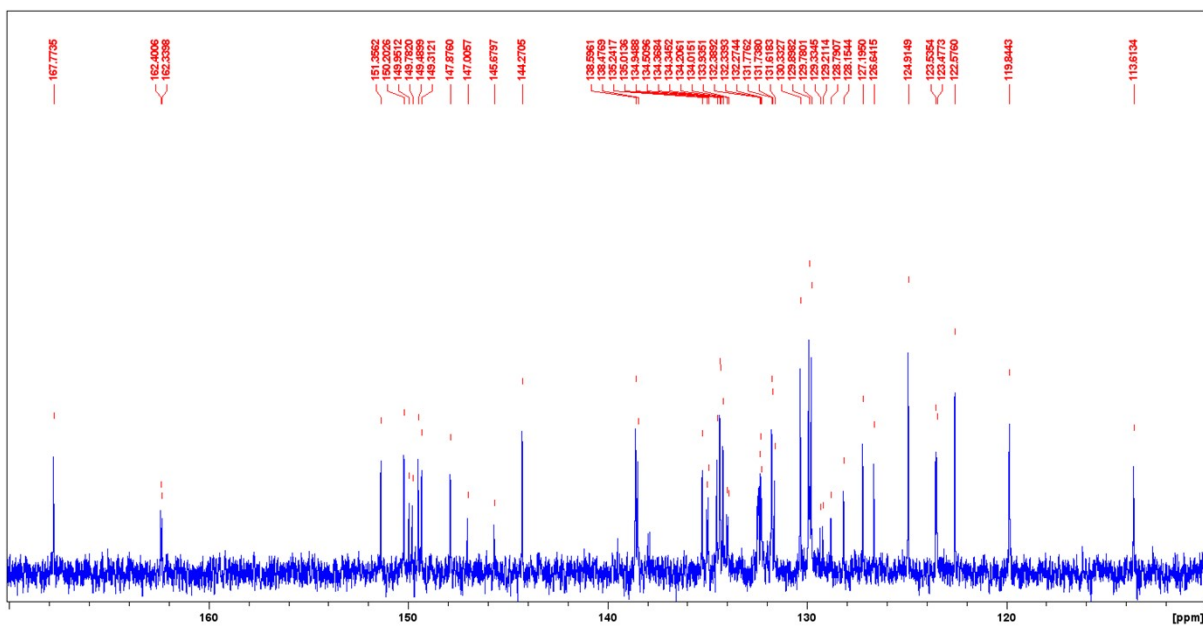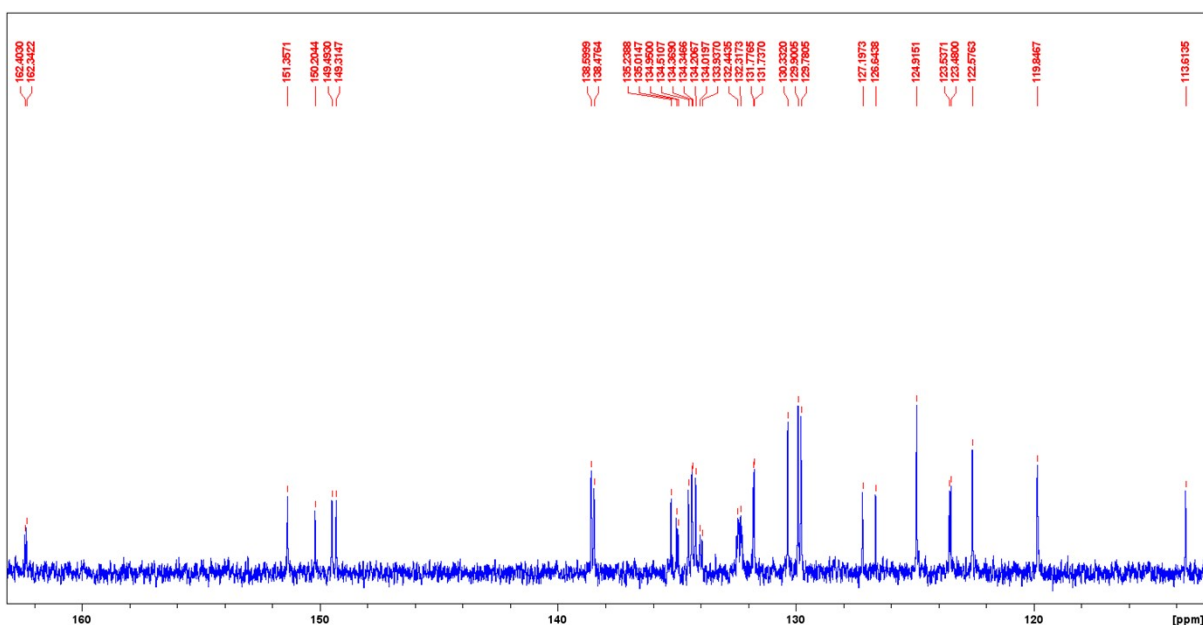

Figure S80.  $^{13}\text{C}\{^1\text{H}\}$  NMR spectra of IrAuL1 recorded at 75 MHz in  $d_6$ -acetone.

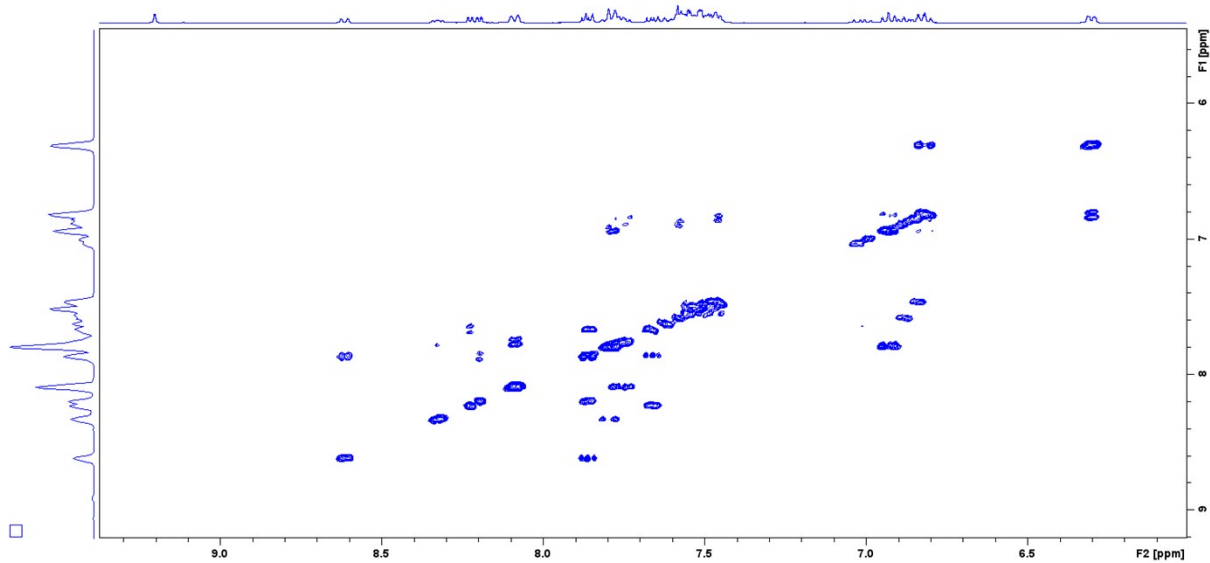

**Figure S81.**  $^1\text{H}$ - $^1\text{H}$  COSY NMR spectrum of **IrAuL1** recorded at 400 MHz in  $d_6$ -acetone.

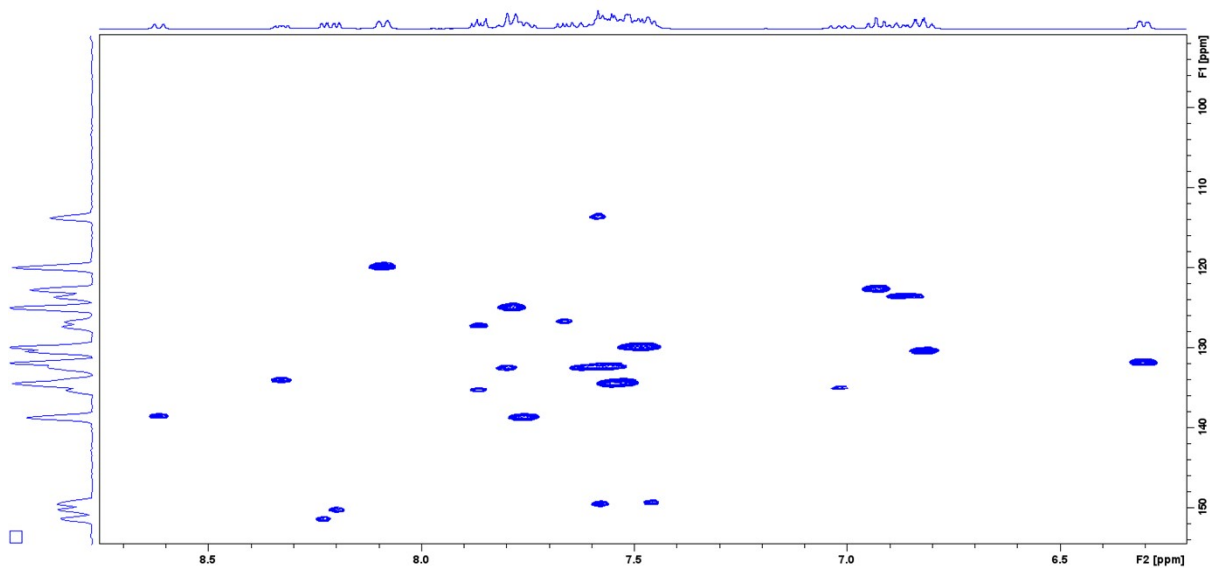

**Figure S82.**  $^1\text{H}$ - $^{13}\text{C}$  HSQC NMR spectrum of **IrAuL1** recorded in  $d_6$ -acetone.

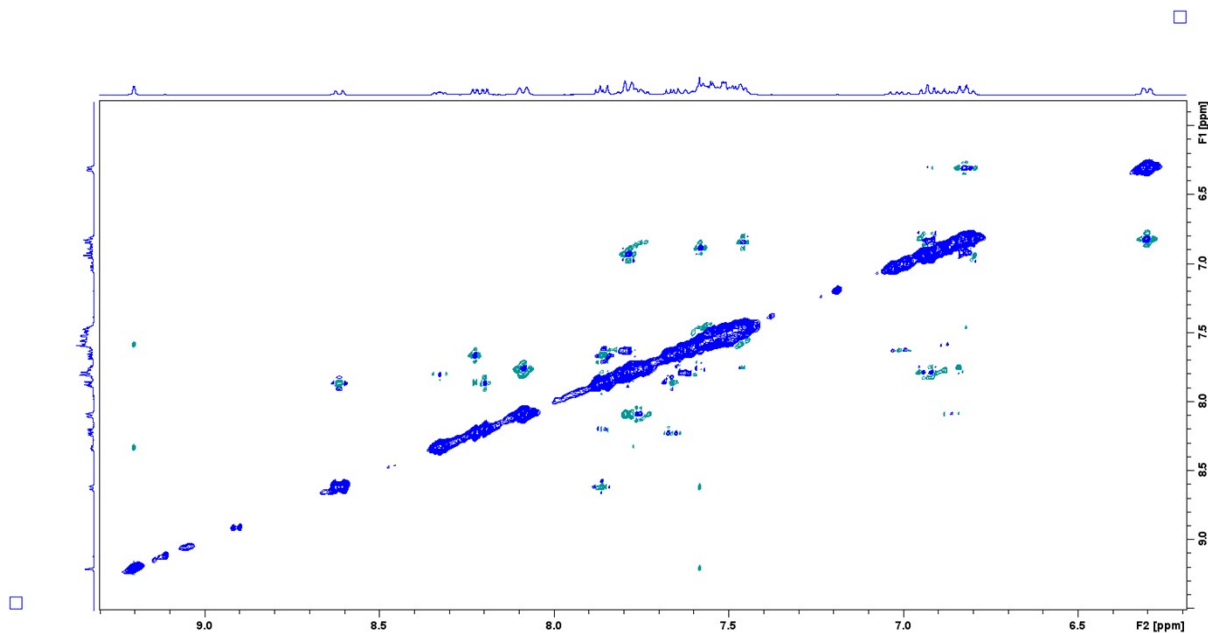

**Figure S83.**  $^1\text{H}$ - $^1\text{H}$  NOESY NMR spectrum of IrAuL1 recorded at 400 MHz in  $\text{d}_6$ -acetone.

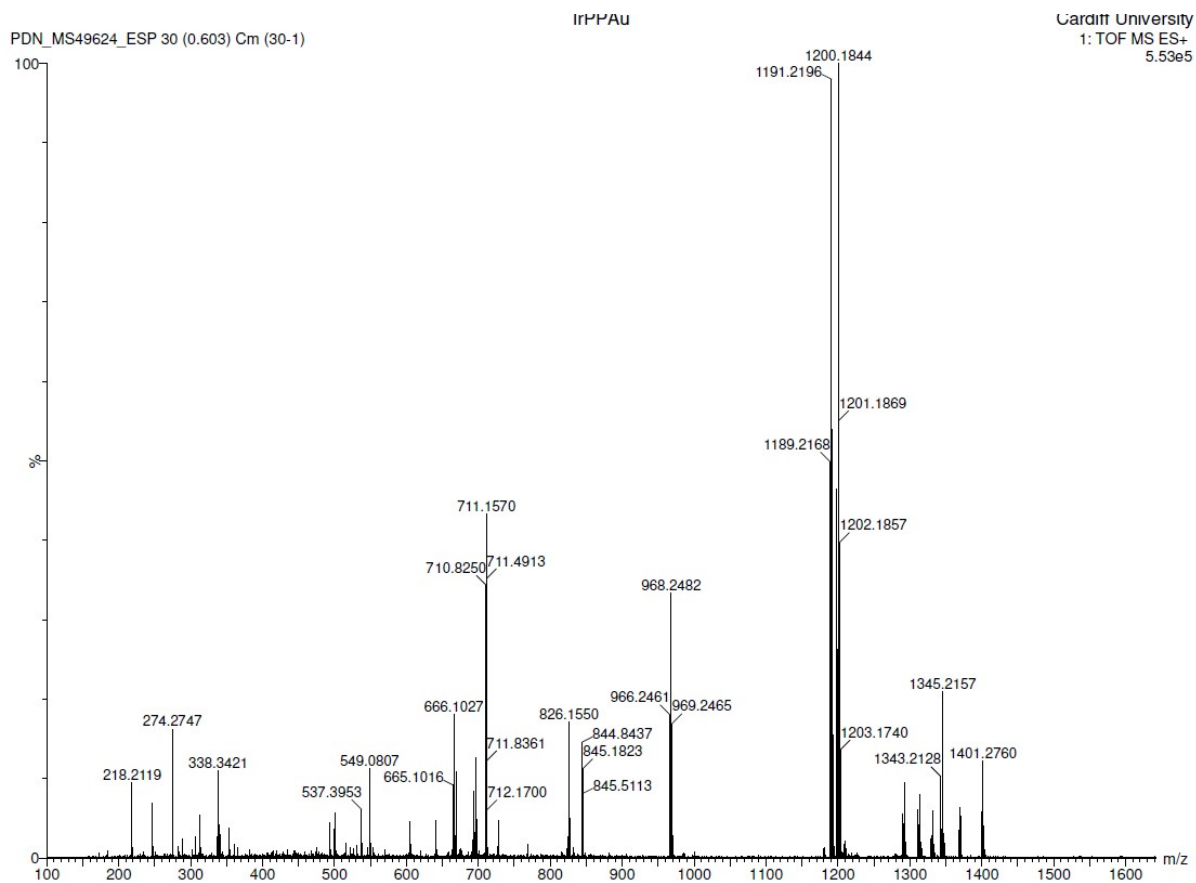

Minimum: -1.5  
Maximum: 5.0 10.0 50.0

| Mass      | Calc. Mass | mDa  | PPM  | DBE  | i-FIT | Norm | Conf (%) | Formula               |
|-----------|------------|------|------|------|-------|------|----------|-----------------------|
| 1200.1844 | 1200.1848  | -0.4 | -0.3 | 39.0 | 574.3 | n/a  | n/a      | C53 H38 N5 Cl P Ir Au |

**Figure S84.** HRMS (ES<sup>+</sup>) spectrum of IrAuL1.

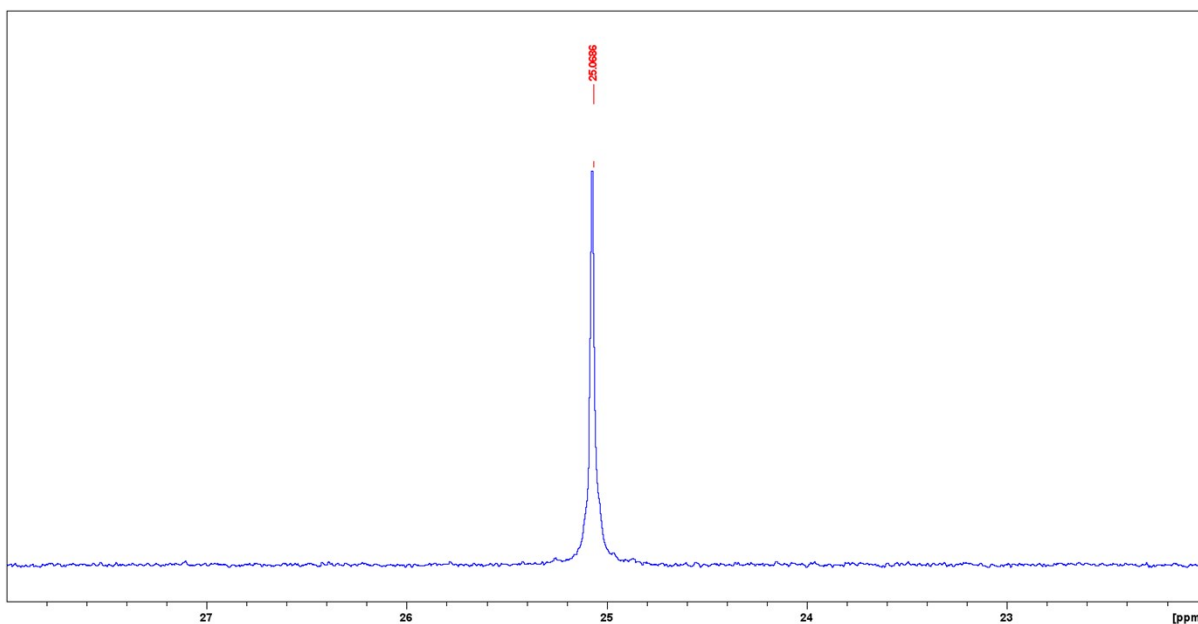

**Figure S85.**  $^{31}\text{P}\{^1\text{H}\}$  NMR spectrum of IrAuL2 recorded at 162 MHz in  $\text{d}_6$ -acetone.

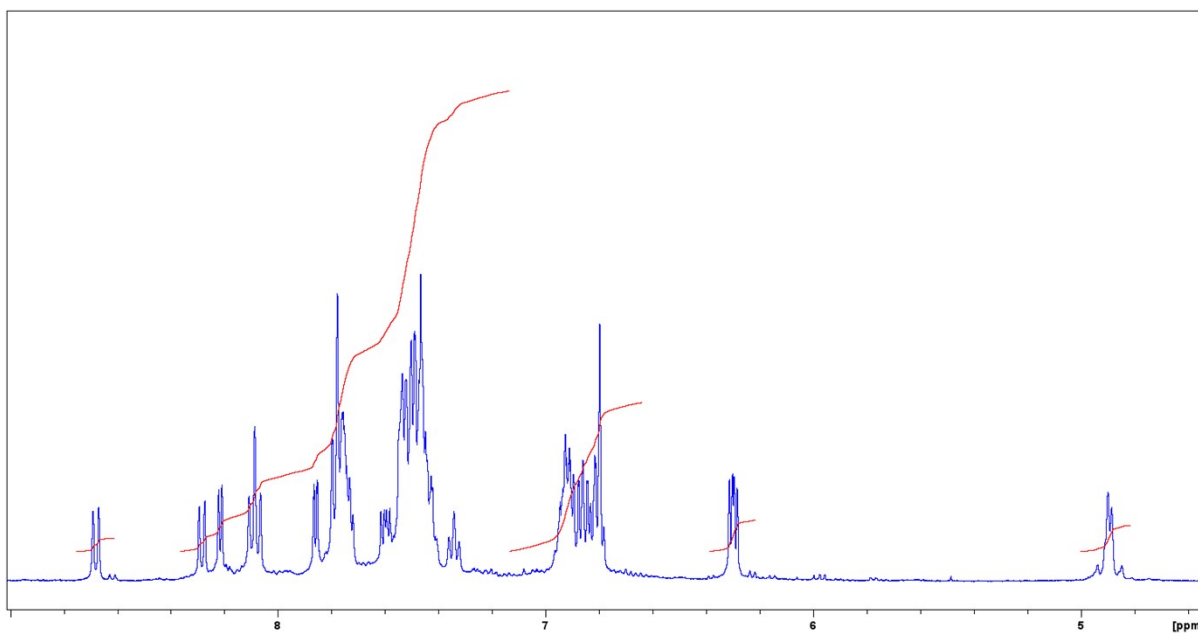

**Figure S86.**  $^1\text{H}$  NMR spectra of IrAuL2 recorded at 400 MHz in  $\text{d}_6$ -acetone.





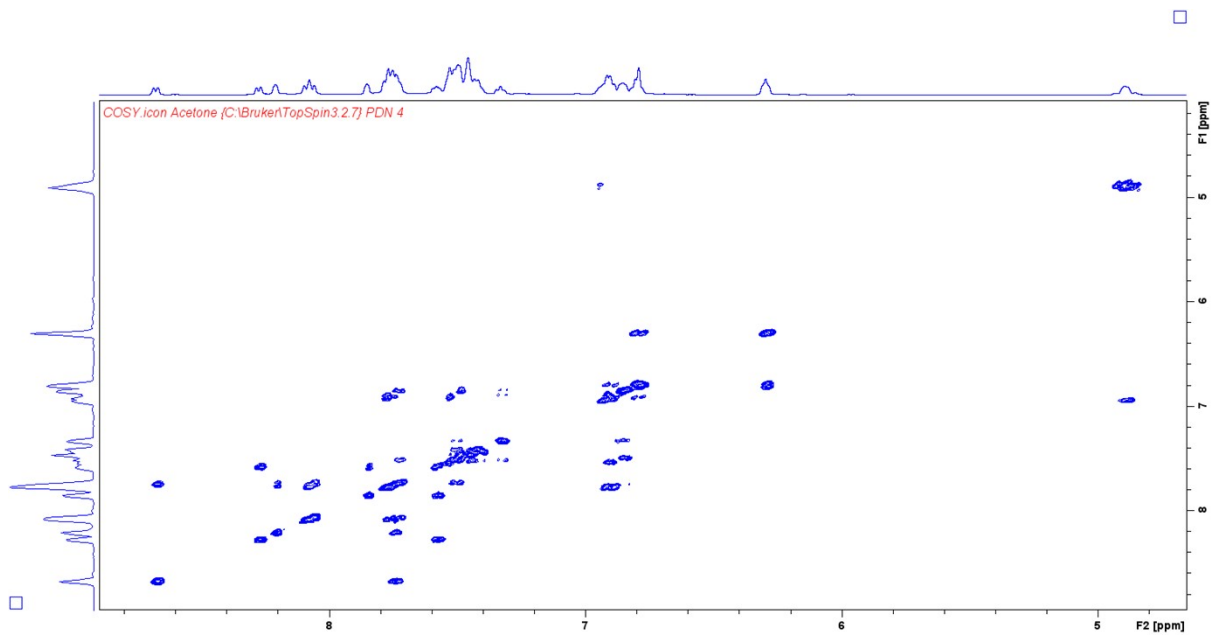

**Figure S88.** <sup>1</sup>H-<sup>1</sup>H COSY NMR spectrum of **IrAuL2** recorded at 400 MHz in d<sub>6</sub>-acetone.

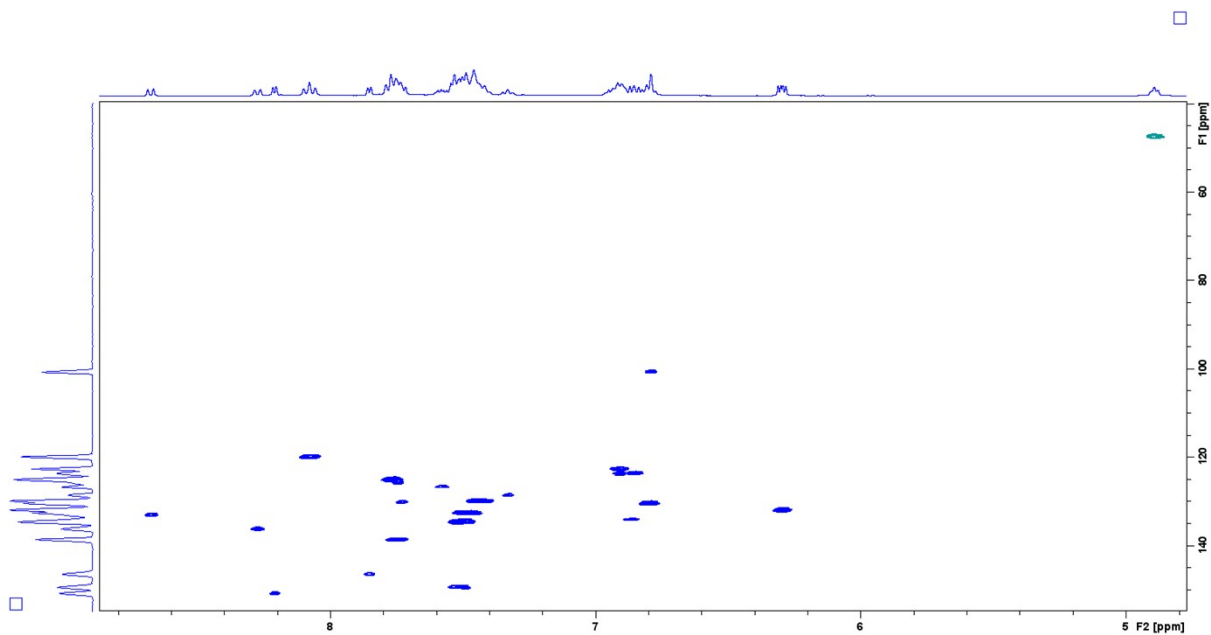

**Figure S89.** <sup>1</sup>H-<sup>13</sup>C HSQC NMR spectrum of **IrAuL2** recorded in d<sub>6</sub>-acetone.

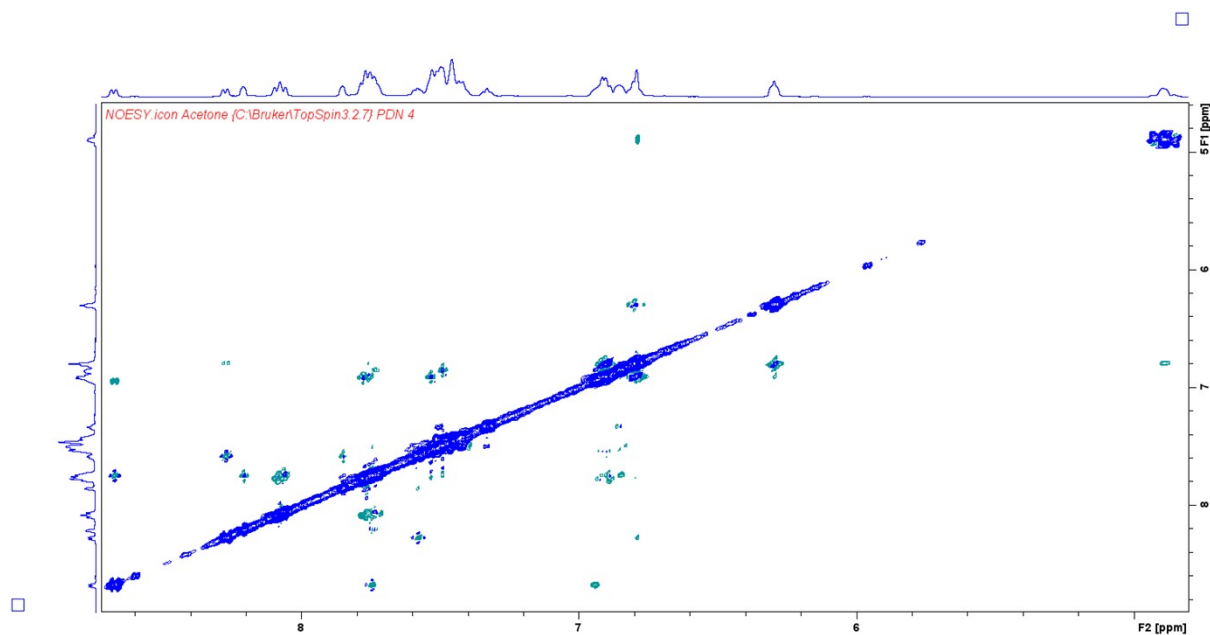

**Figure S90.**  $^1\text{H}$ - $^1\text{H}$  NOESY NMR spectrum of IrAuL2 recorded at 400 MHz in  $d_6$ -acetone.

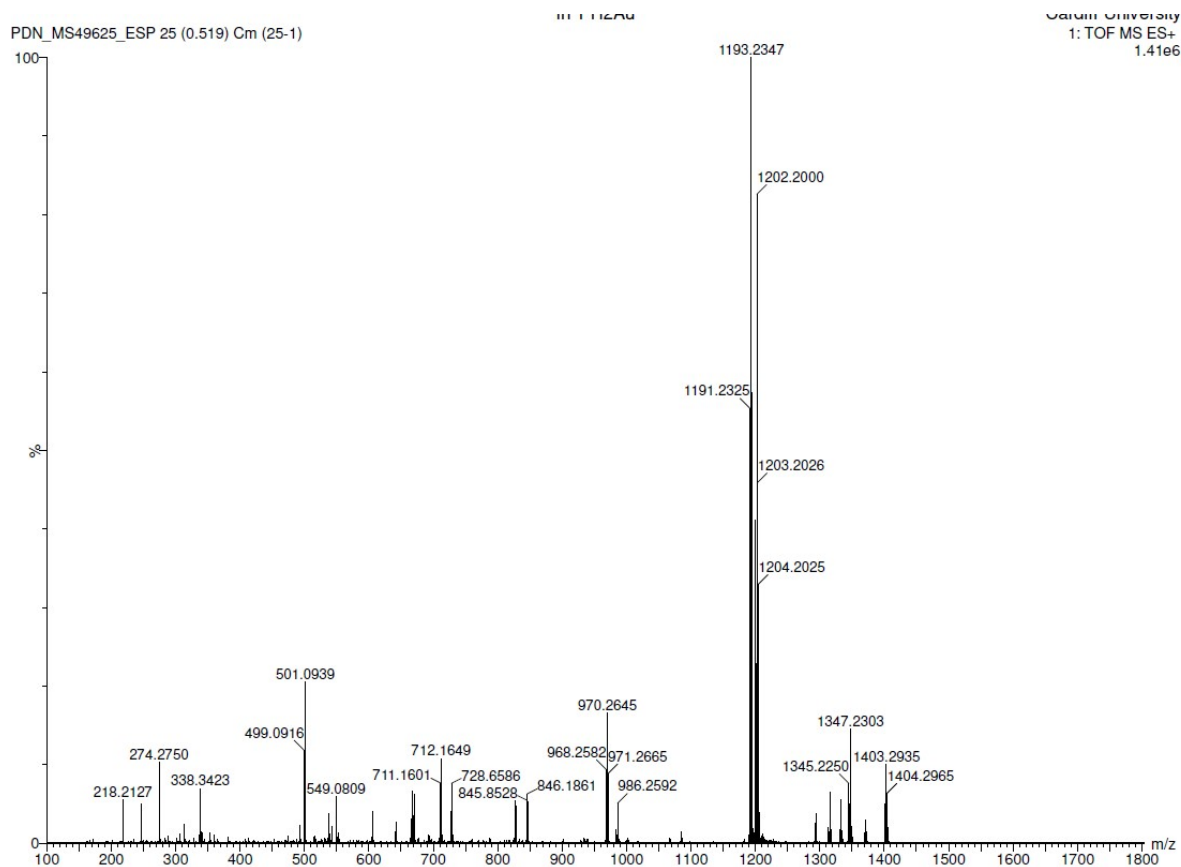

Minimum: -1.5  
 Maximum: 5.0 10.0 50.0

| Mass      | Calc. Mass | mDa  | PPM  | DBE  | i-FIT | Norm | Conf (%) | Formula                                                   |
|-----------|------------|------|------|------|-------|------|----------|-----------------------------------------------------------|
| 1202.2000 | 1202.2005  | -0.5 | -0.4 | 38.0 | 581.9 | n/a  | n/a      | C <sub>53</sub> H <sub>40</sub> N <sub>5</sub> P Cl Ir Au |

**Figure S91.** HRMS ( $\text{ES}^+$ ) spectrum of IrAuL2.

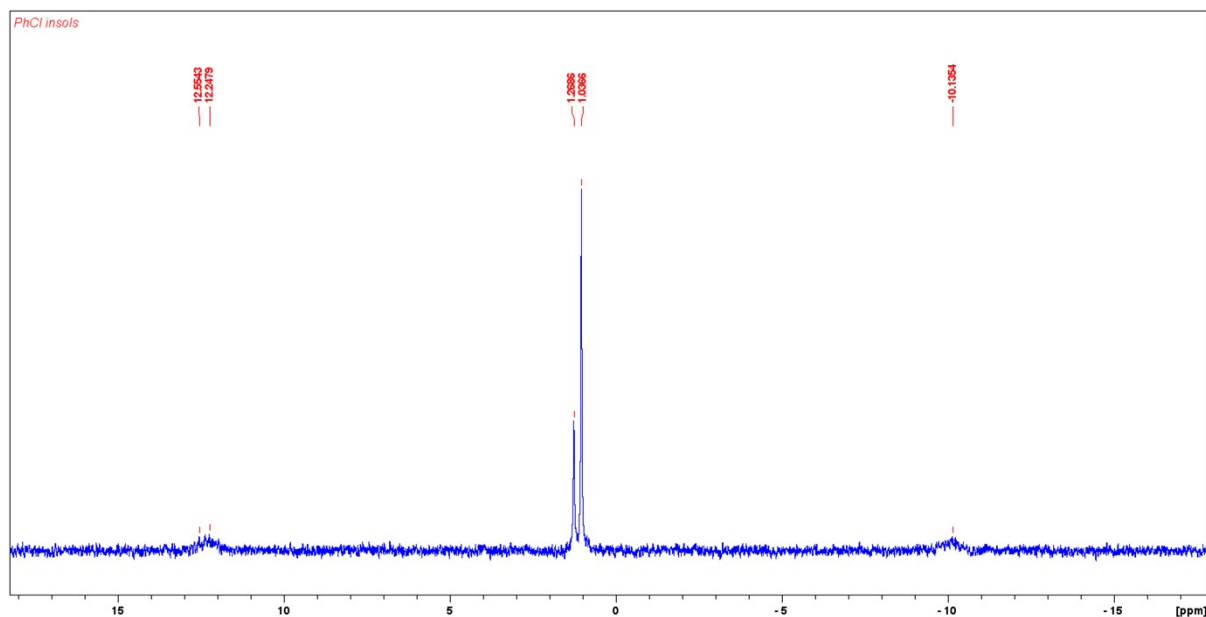

**Figure S92.**  $^{31}\text{P}\{^1\text{H}\}$  NMR spectrum of **RePtL1** recorded at 293 K and 162 MHz in  $\text{d}_6$ -dmso.

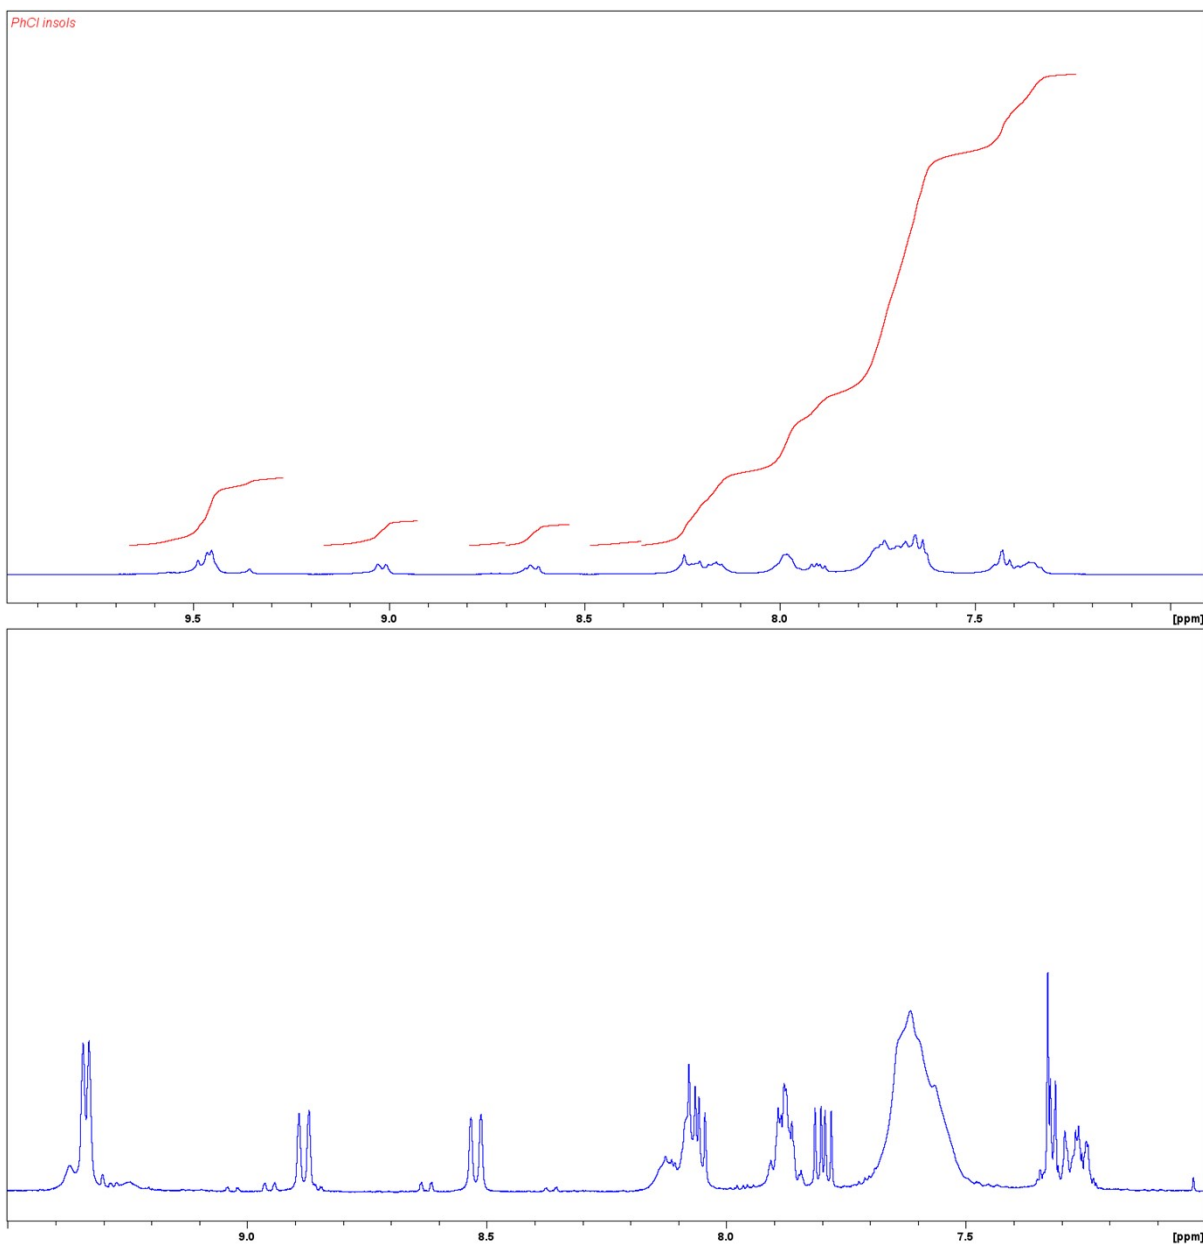

**Figure S93.**  $^1\text{H}$  NMR spectra of **RePtL1** recorded at 400 MHz in  $\text{d}_6\text{-dmsol}$ . Upper trace recorded at 293 K and lower trace at 353 K.

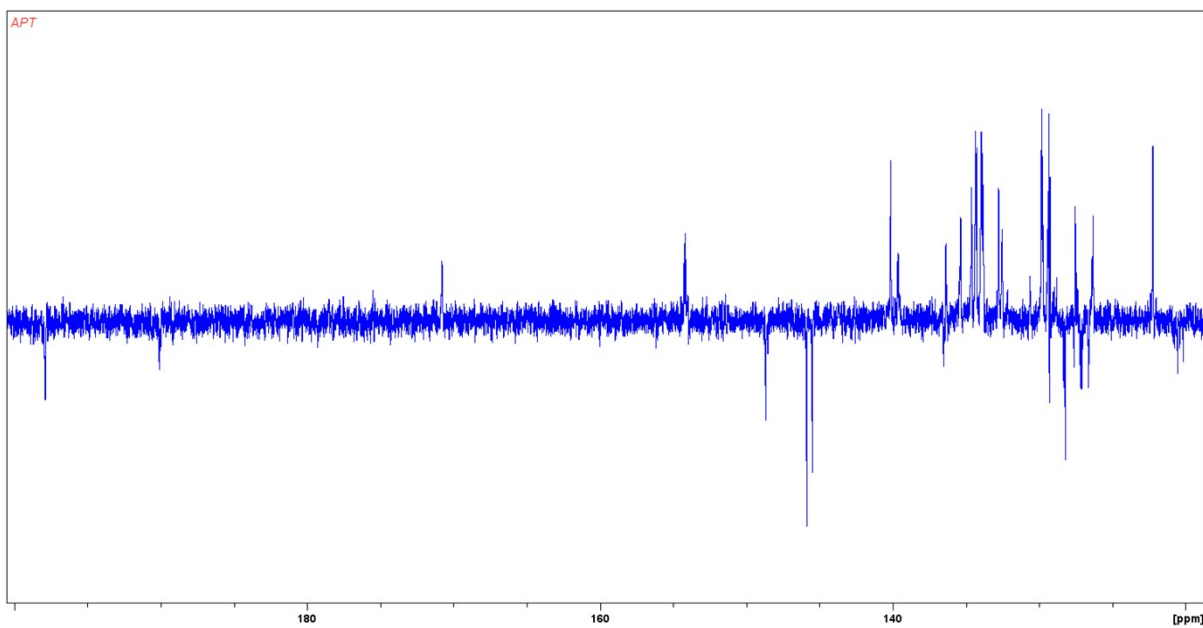

**Figure S94.**  $^{13}\text{C}\{^1\text{H}\}$  NMR spectrum of **RePtL1** recorded at 75 MHz in  $\text{d}_6\text{-dmsol}$ .

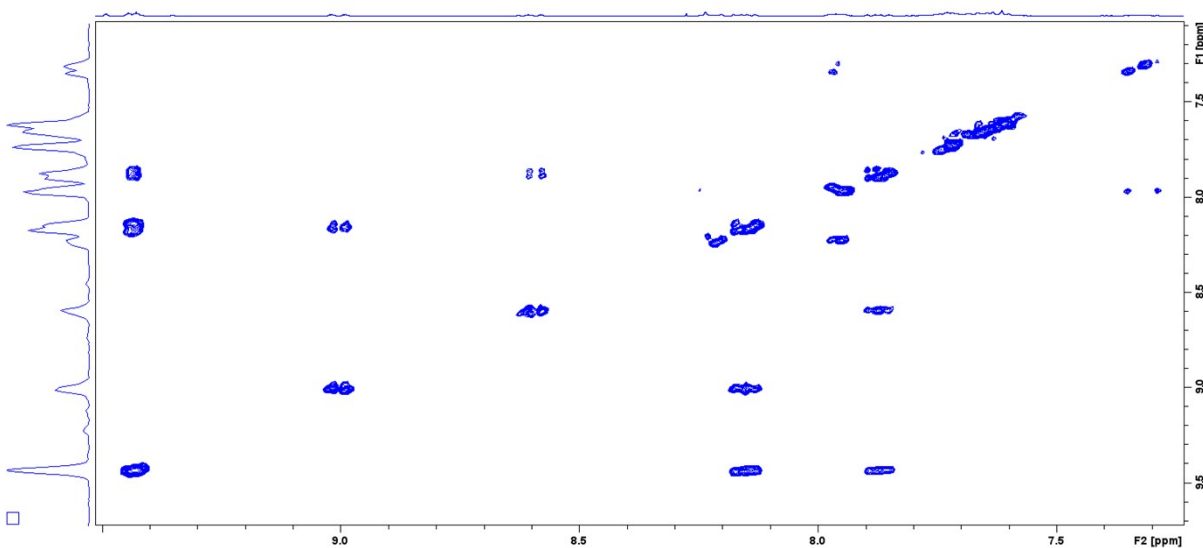

**Figure S95.**  $^1\text{H}\text{-}^1\text{H}$  COSY NMR spectrum of **RePtL1** recorded at 400 MHz in  $\text{d}_6\text{-dmsol}$ .

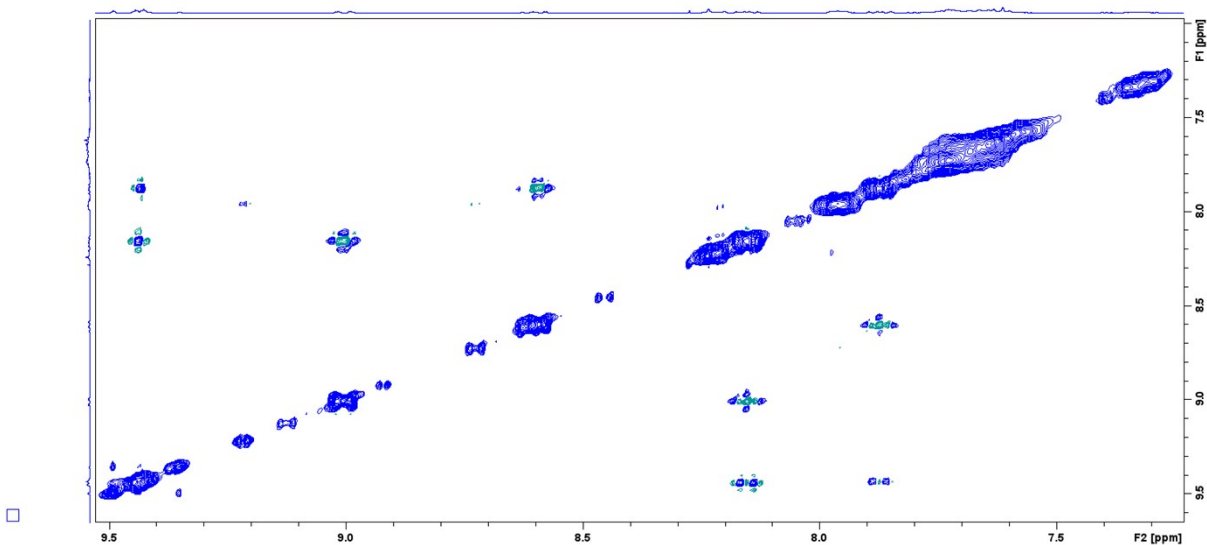

**Figure S96.**  $^1\text{H}$ - $^1\text{H}$  NOESY NMR spectrum of **RePtL1** recorded at 400 MHz in  $d_6$ -dmsO.

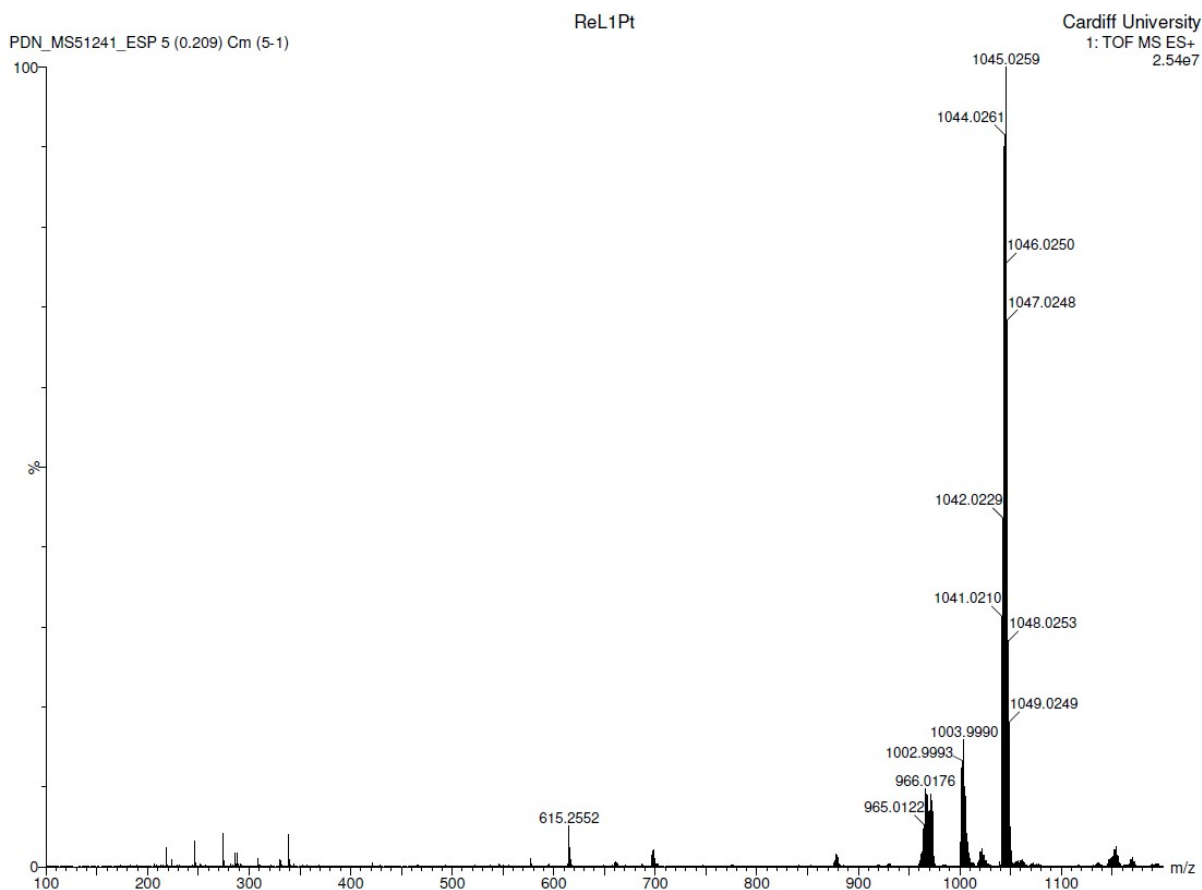

Minimum: -1.5  
 Maximum: 5.0 10.0 50.0

| Mass      | Calc. Mass | mDa | PPM | DBE  | i-FIT  | Norm | Conf (%) | Formula                         |
|-----------|------------|-----|-----|------|--------|------|----------|---------------------------------|
| 1003.9990 | 1003.9983  | 0.7 | 0.7 | 26.0 | 1112.2 | n/a  | n/a      | C34 H22 N3 O3 P C12 187Re 196Pt |

**Figure S97.** HRMS ( $\text{ES}^+$ ) spectrum of **RePtL1**.

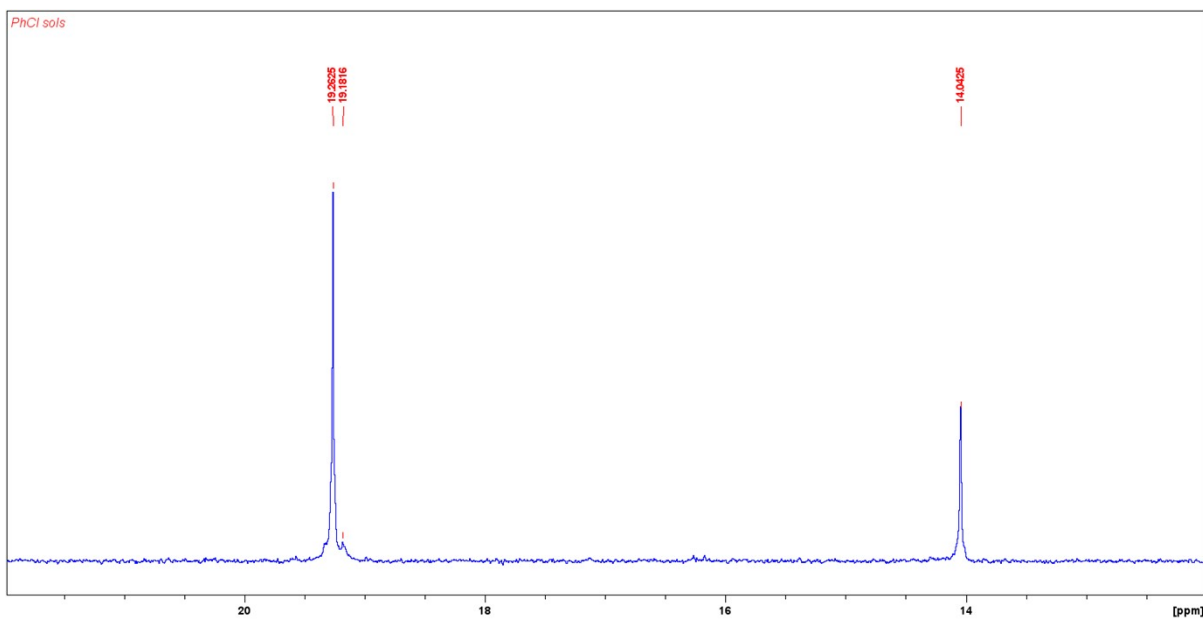

**Figure S98.**  $^{31}\text{P}\{^1\text{H}\}$  NMR spectrum of **RePdL1** recorded at 162 MHz in  $\text{CDCl}_3$ .

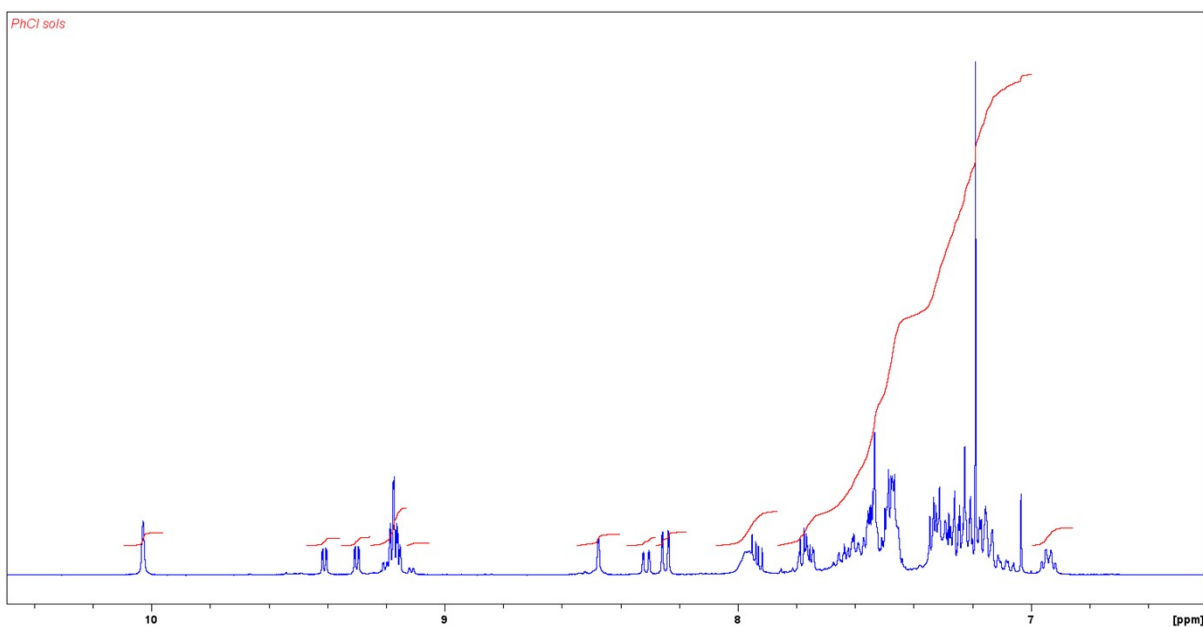

**Figure S99.**  $^1\text{H}$  NMR spectra of **RePdL1** recorded at 400 MHz in  $\text{CDCl}_3$ .



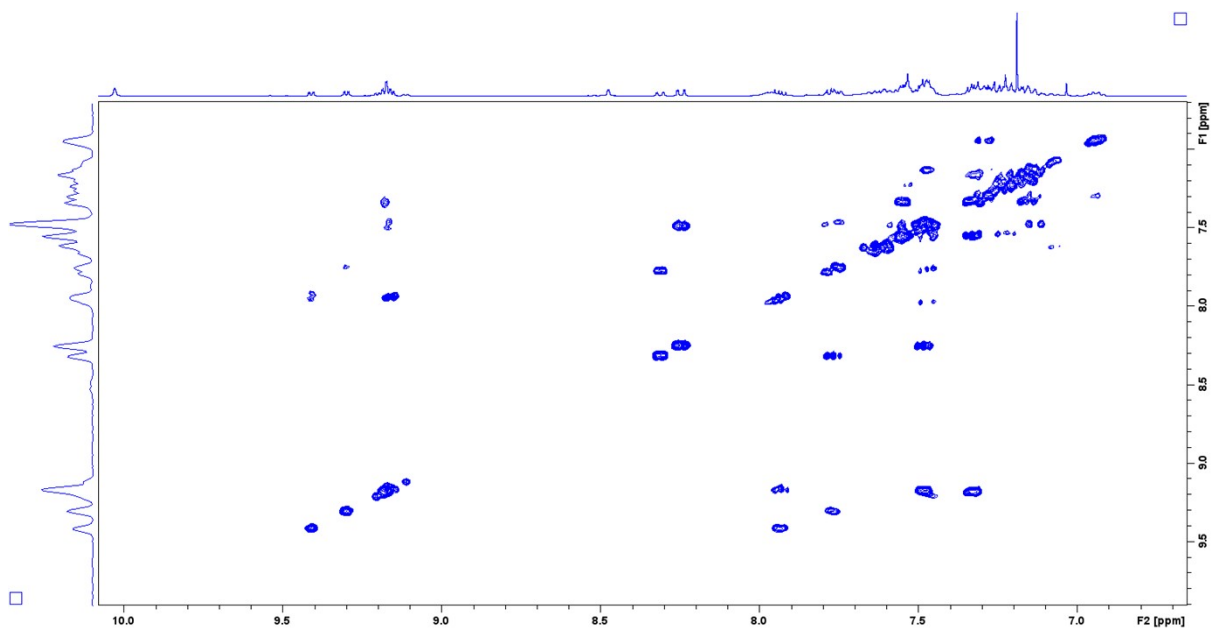

**Figure S100.** <sup>1</sup>H-<sup>1</sup>H COSY NMR spectrum of **RePdL1** recorded at 400 MHz in CDCl<sub>3</sub>.

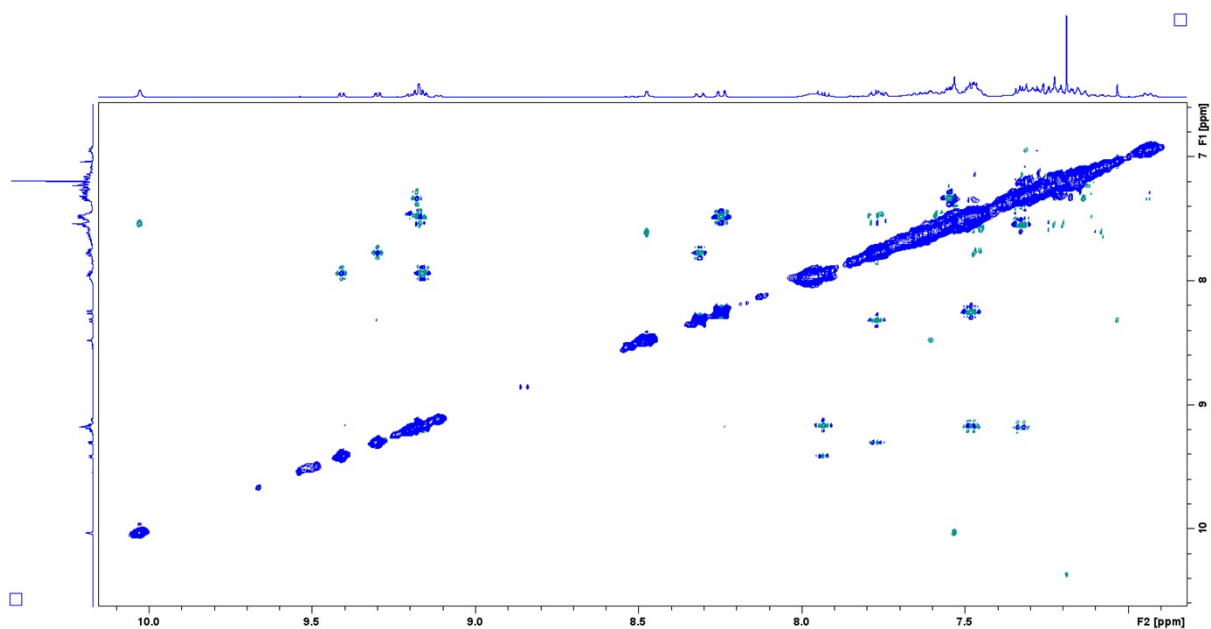

**Figure S101.** <sup>1</sup>H-<sup>1</sup>H NOESY NMR spectrum of **RePdL1** recorded at 400 MHz in CDCl<sub>3</sub>.

04-Jun-2024

RePdppt

XEVO-G2XSQTOF#NotSet  
Cardiff University  
1: TOF MS ES+  
3.75e6

PDN\_MS51356\_ESP 5 (0.209) Cm (5-1)

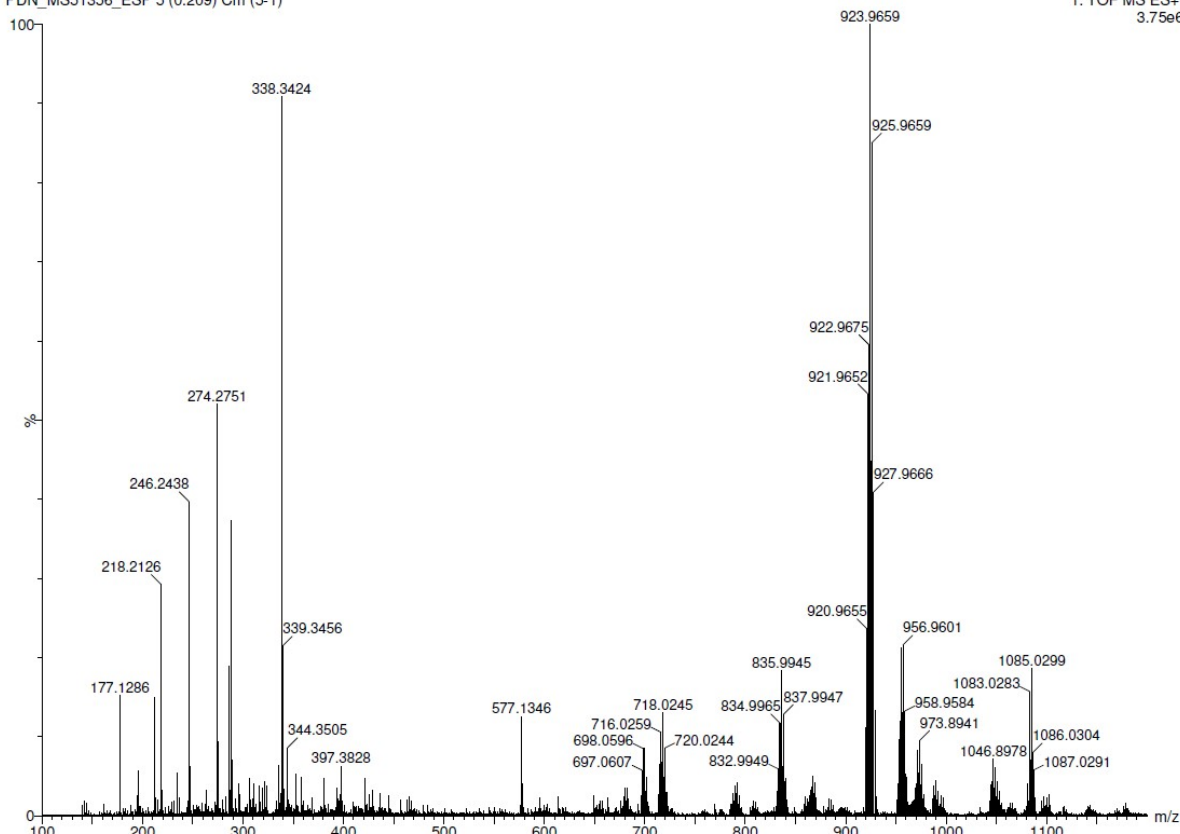

Minimum: -1.5  
Maximum: 5.0 10.0 50.0

| Mass     | Calc. Mass | mDa | PPM | DBE  | i-FIT  | Norm | Conf (%) | Formula                  |
|----------|------------|-----|-----|------|--------|------|----------|--------------------------|
| 923.9659 | 923.9656   | 0.3 | 0.3 | 26.0 | 1207.5 | n/a  | n/a      | C35 H23 N3 O5 P Cl Pd Re |

Figure S102. HRMS (ES<sup>+</sup>) spectrum of RePdL1.

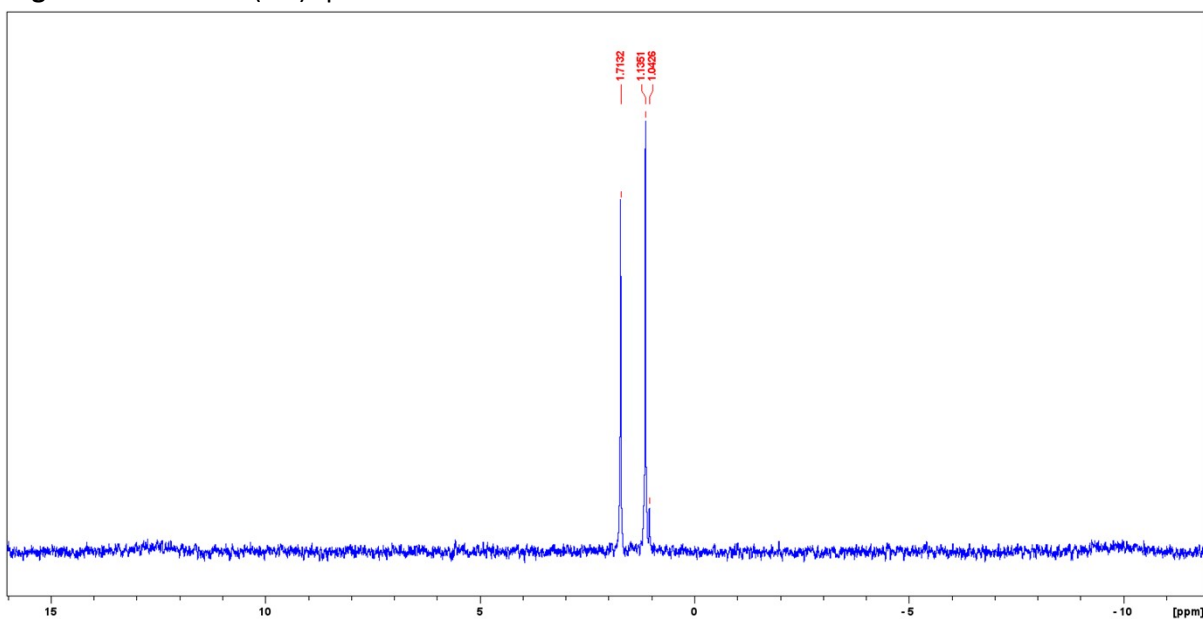

Figure S103. <sup>31</sup>P{<sup>1</sup>H} NMR spectrum of IrPtL1 recorded at 162 MHz in d<sub>6</sub>-dmsO.

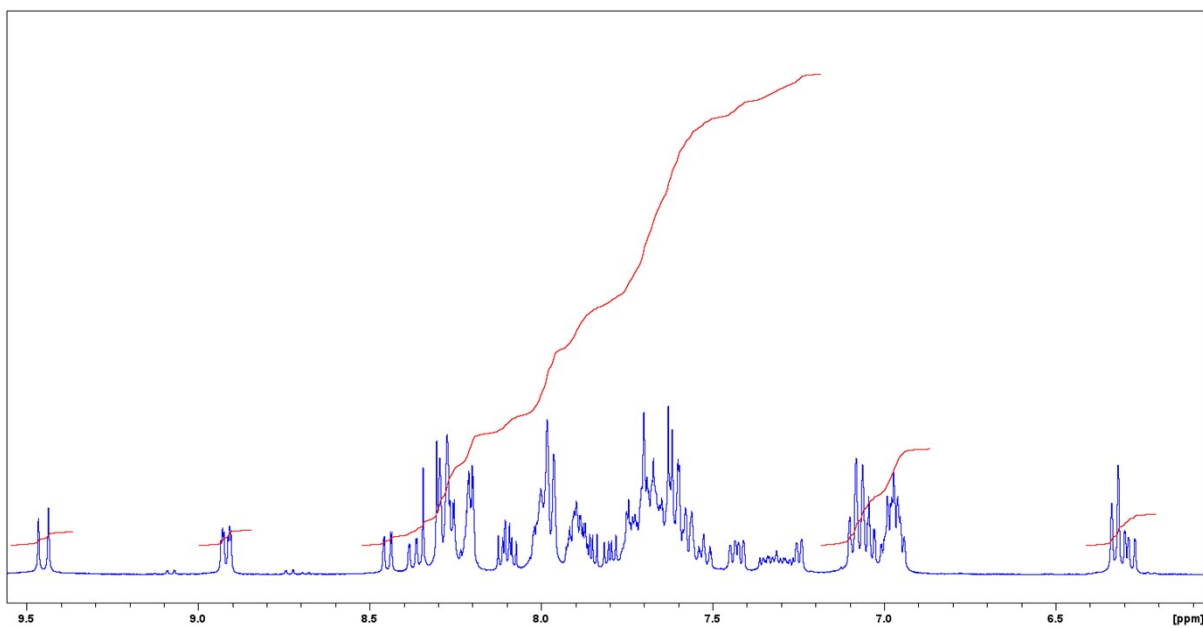

**Figure S104.**  $^1\text{H}$  NMR spectra of **IrPtL1** recorded at 400 MHz in  $\text{d}_6$ -dmsol.

□

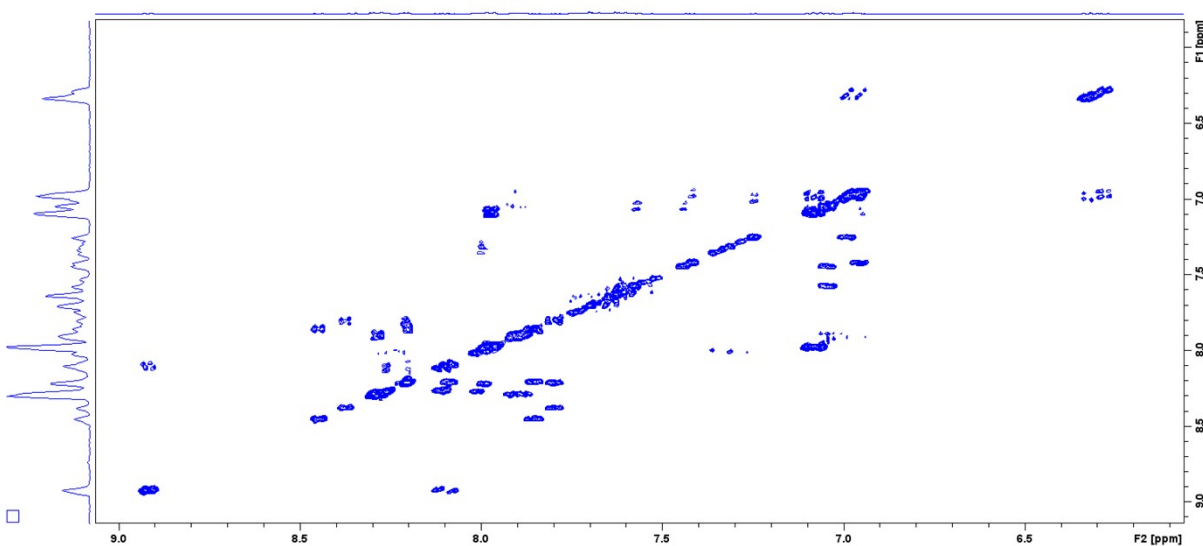

**Figure S105.**  $^1\text{H}$ - $^1\text{H}$  COSY NMR spectrum of **IrPtL1** recorded at 400 MHz in  $\text{d}_6$ -dmsol.

□

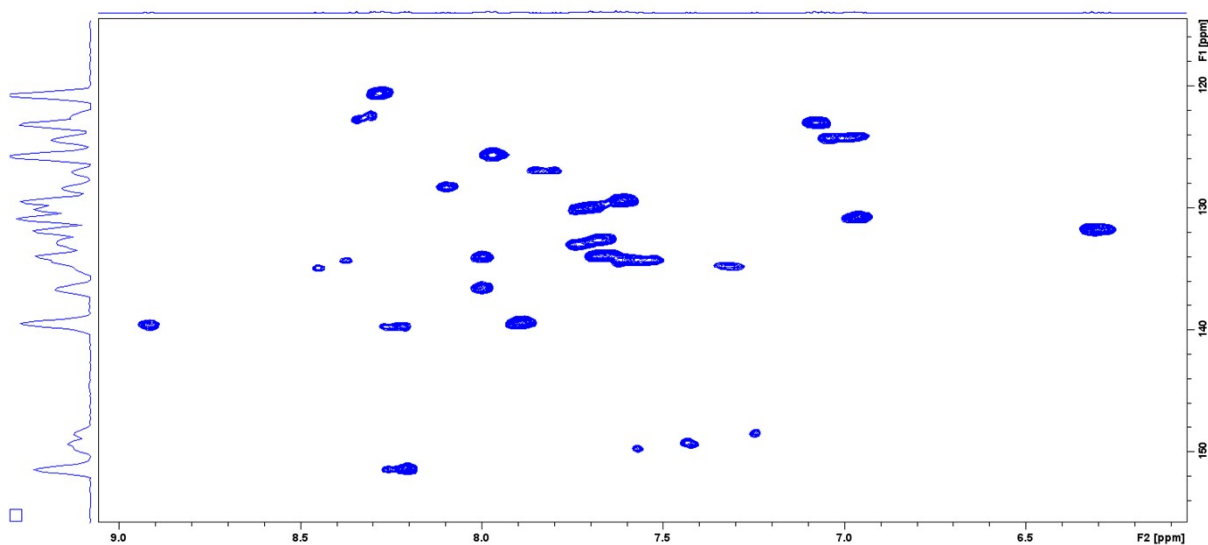

**Figure S106.**  $^1\text{H}$ - $^{13}\text{C}$  HSQC NMR spectrum of IrPtL1 recorded in  $d_6$ -dmso.

30-Apr-2024

IrL1Pt

XEVO-G2XSQTOF#NotSet  
Cardiff University  
1: TOF MS ES+  
2.11e6

PDN\_MS50850\_ESP 10 (0.398) Cm (10-1)

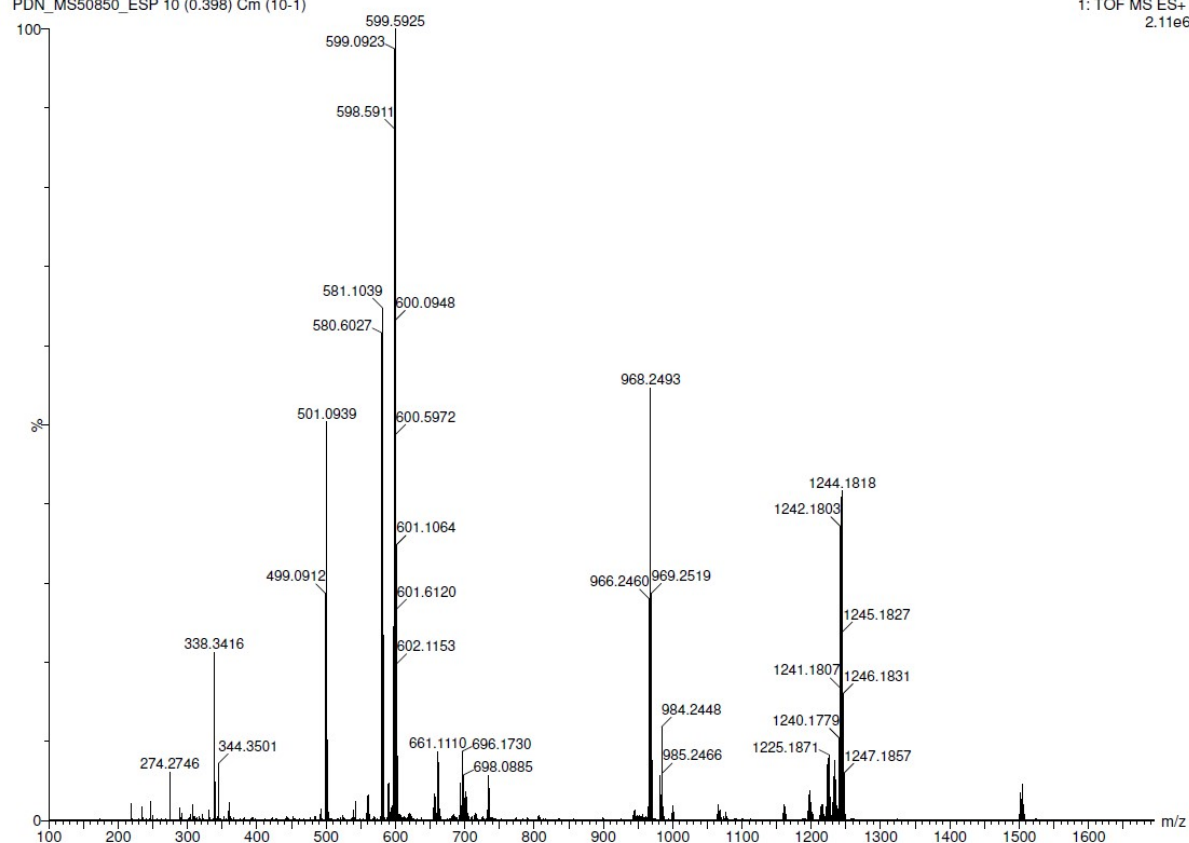

Minimum: -1.5  
Maximum: 5.0 50.0 50.0

| Mass      | Calc. Mass | mDa | PPM | DBE  | i-FIT | Norm | Conf (%) | Formula                |
|-----------|------------|-----|-----|------|-------|------|----------|------------------------|
| 1233.1541 | 1233.1519  | 2.2 | 1.8 | 39.0 | 589.1 | n/a  | n/a      | C53 H38 N5 P C12 Ir Pt |

**Figure S107.** HRMS ( $\text{ES}^+$ ) spectrum of IrPtL1.

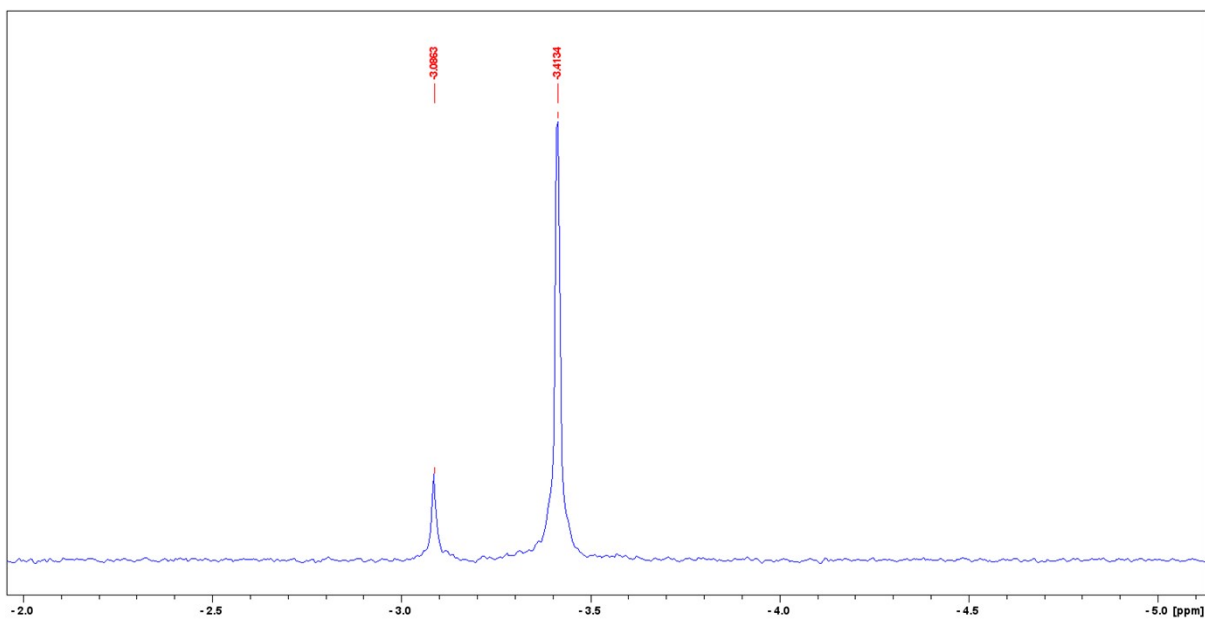

**Figure S108.**  $^{31}\text{P}\{^1\text{H}\}$  NMR spectrum of IrPdL1 recorded at 162 MHz in  $\text{d}_6$ -dmso.

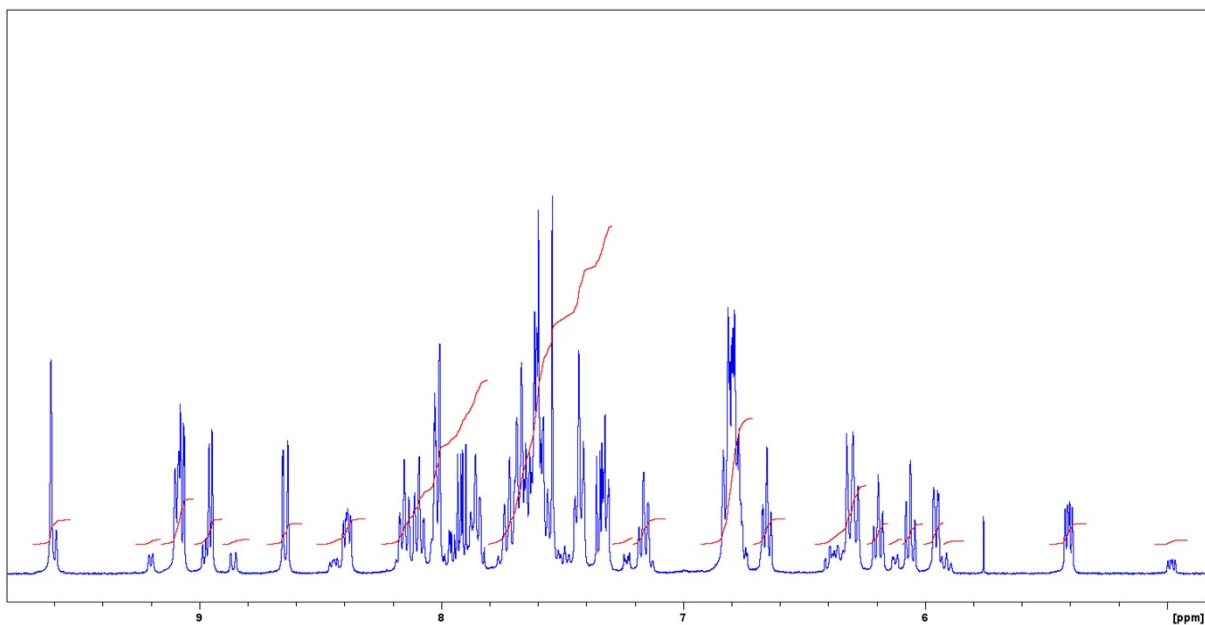

**Figure S109.**  $^1\text{H}$  NMR spectra of IrPdL1 recorded at 400 MHz in  $\text{d}_6$ -dmso.

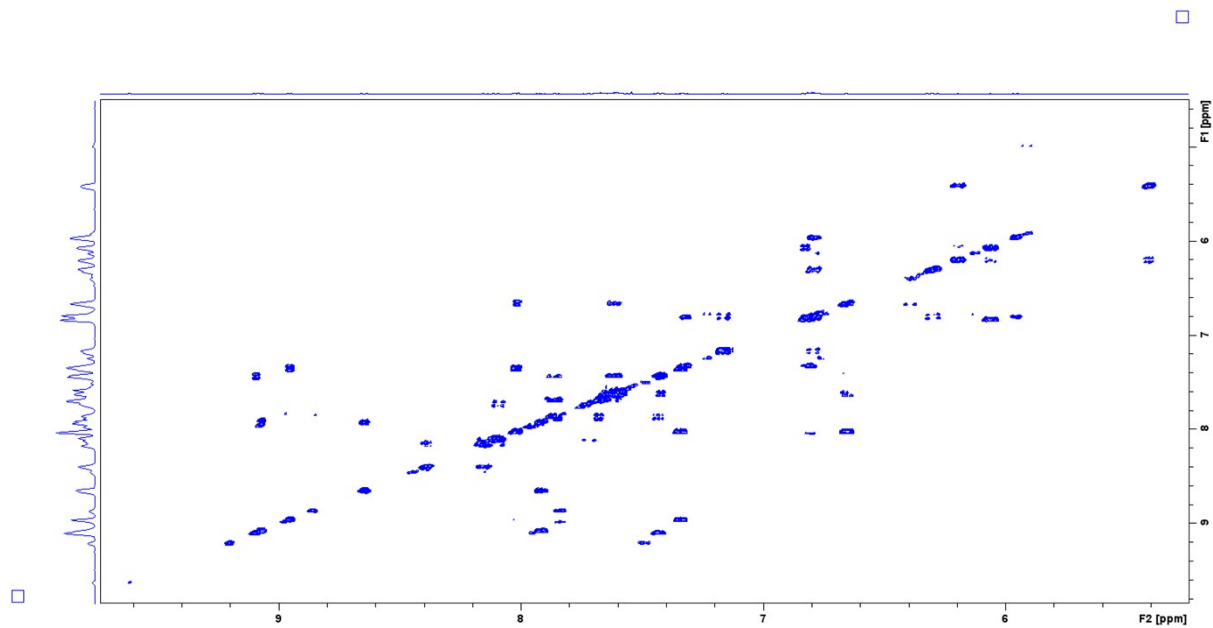

**Figure S110.**  $^1\text{H}$ - $^1\text{H}$  COSY NMR spectrum of **IrPdL1** recorded at 400 MHz in  $d_6$ -dmsol.

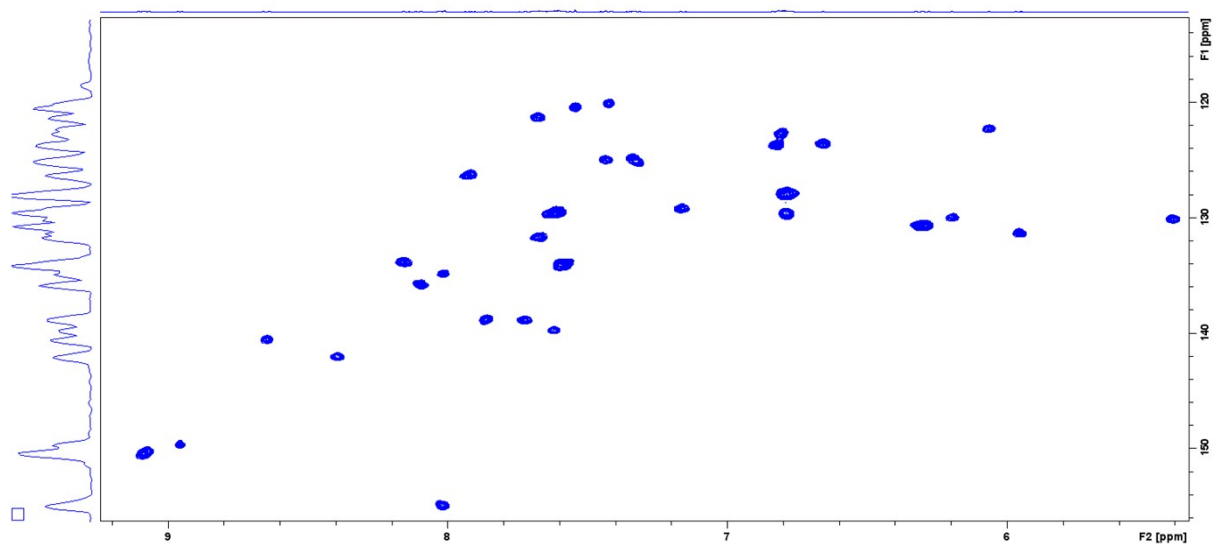

**Figure S111.**  $^1\text{H}$ - $^{13}\text{C}$  HSQC NMR spectrum of **IrPdL1** recorded in  $d_6$ -dmsol.

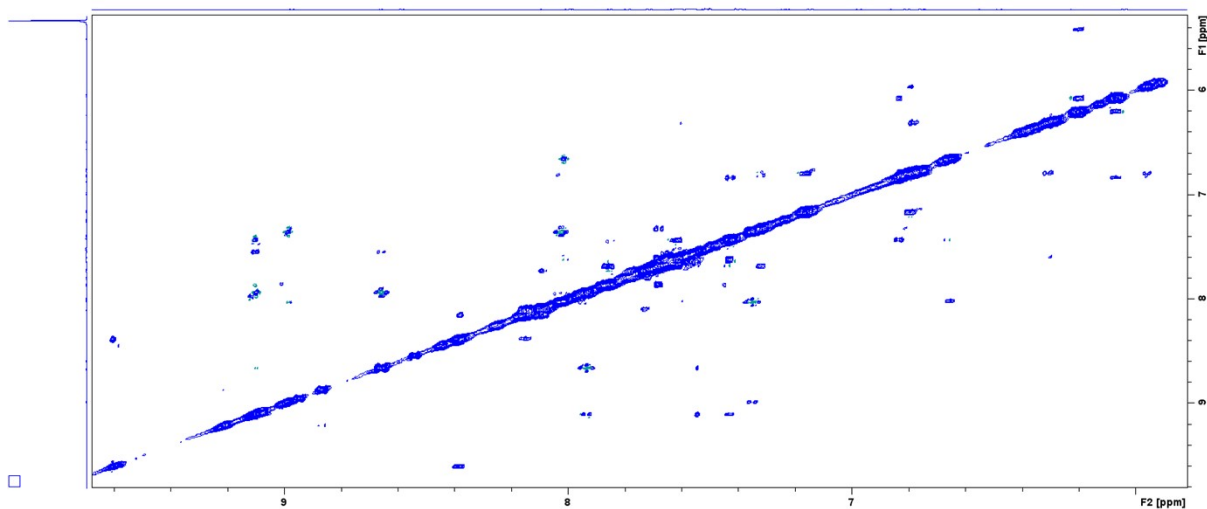

**Figure S112.**  $^1\text{H}$ - $^1\text{H}$  NOESY NMR spectrum of IrPdL1 recorded at 400 MHz in  $d_6$ -dmso.

21-May-2024 IrL1Pd XEVO-G2XSQT0F#NotSet  
Cardiff University  
1: TOF MS ES+  
7.10e6

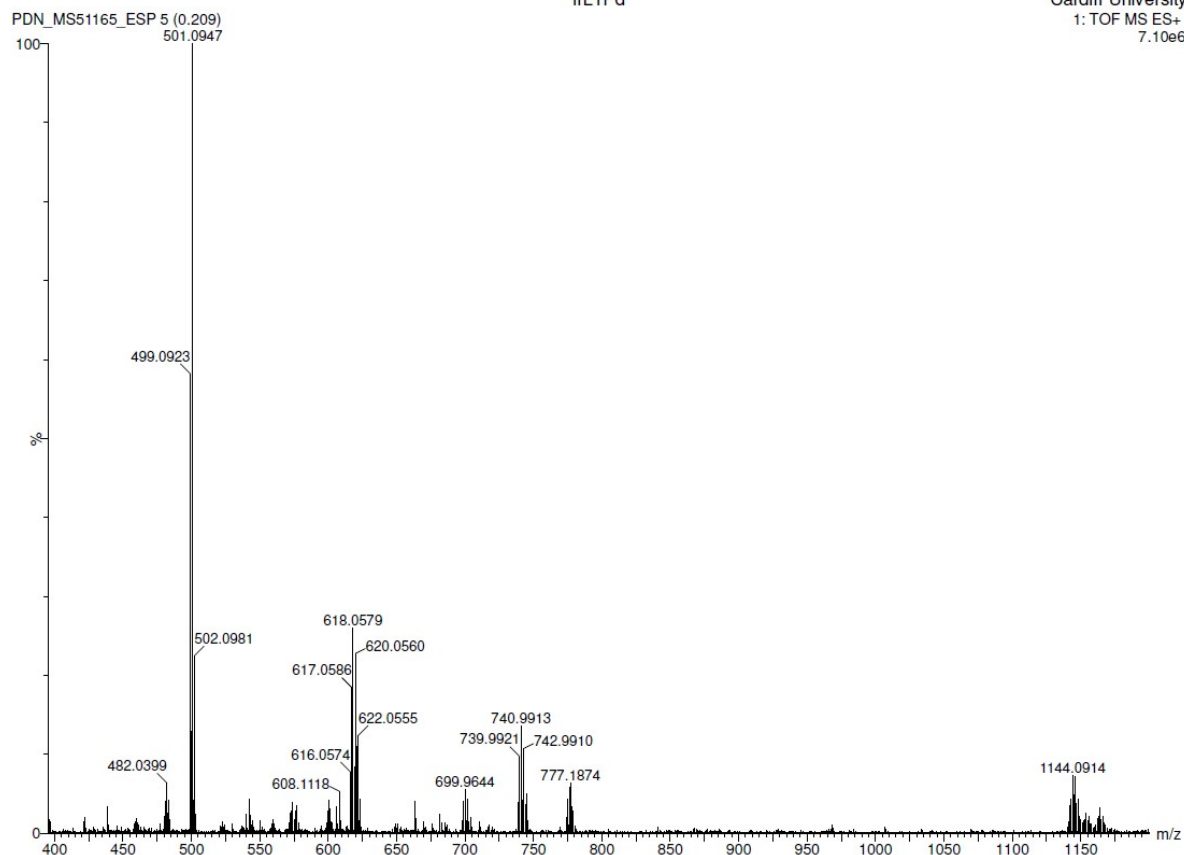

Minimum: -1.5  
Maximum: 5.0 10.0 50.0

| Mass      | Calc. Mass | mDa | PPM | DBE  | i-FIT  | Norm | Conf (%) | Formula                |
|-----------|------------|-----|-----|------|--------|------|----------|------------------------|
| 1144.0914 | 1144.0906  | 0.8 | 0.7 | 38.0 | 1265.5 | n/a  | n/a      | C53 H38 N5 P Cl2 Pd Ir |

**Figure S113.** HRMS ( $\text{ES}^+$ ) spectrum of IrPdL1.

|               | H1                | H2   | H3   | H4   | H5   | H6   | H7                | H8    |
|---------------|-------------------|------|------|------|------|------|-------------------|-------|
| <b>L1</b>     | 9.01              | 7.49 | 7.99 | 6.64 | 8.25 | 7.44 | 9.09              | 9.09  |
| <b>ReL1</b>   | 9.20              | 7.71 | 8.29 | 6.90 | 8.29 | 7.60 | 9.27              | 9.01  |
| <b>2ReL1</b>  | 9.52              | 8.23 | 9.17 | 8.07 |      | 7.54 | 9.44              | 9.25  |
| <b>ReAuL1</b> | 9.17              | 7.76 | 8.60 | 7.51 |      | 7.50 | 9.20              | 9.02  |
| <b>RuL1</b>   | 8.24              | 7.60 | 7.98 | 8.04 | 7.92 |      | 8.51              | 9.14  |
| <b>RuAuL1</b> | 8.20              | 7.75 | 8.53 | 7.55 |      |      |                   | 9.14  |
| <b>IrAuL1</b> | 8.20              | 7.87 | 8.62 | 7.59 | 7.87 | 7.67 | 8.23              | 9.21  |
| <b>L2</b>     | 8.80              | 7.39 | 7.88 | 6.61 |      |      | 9.00              |       |
| <b>ReL2</b>   | 8.85              | 7.69 | 8.23 | 6.50 | 8.79 | 7.84 | 9.25              |       |
| <b>2ReL2</b>  | 9.27              | 7.78 | 8.38 | 7.62 | 9.20 | 7.91 | 9.41              |       |
| <b>ReAuL2</b> | 8.75              |      | 8.38 | 6.49 | 7.94 |      | 8.89              |       |
| <b>RuAuL2</b> |                   |      |      |      |      |      |                   |       |
| <b>IrAuL2</b> | 7.86              | 7.60 | 8.28 | 6.80 | 8.22 | 7.75 | 8.68              |       |
| <b>AuL1</b>   | 9.03              |      | 8.28 | 7.23 | 7.33 | 7.71 | 9.05              | 9.08  |
| <b>AuL2</b>   | 8.72              |      | 7.67 | 6.33 | 8.17 |      | 8.95              |       |
| <b>RePtL1</b> | 9.43 <sup>a</sup> | 7.87 | 8.59 | 7.62 | 9.00 | 8.15 | 9.43 <sup>a</sup> | 9.49  |
| <b>RePdL1</b> | 9.17 <sup>a</sup> | 7.48 | 8.25 | 7.53 | 7.55 | 7.33 | 9.17 <sup>a</sup> | 10.03 |
| <b>IrPdL1</b> | 9.09              | 7.43 | 8.64 | 7.54 | 8.95 | 7.33 | 9.07              | 9.62  |

<sup>a</sup> overlapping

**Table S1.** <sup>1</sup>H NMR assignments (based on the structure below) for the aromatic hydrogens of the phenanthroline fragment in the ligands and complexes.

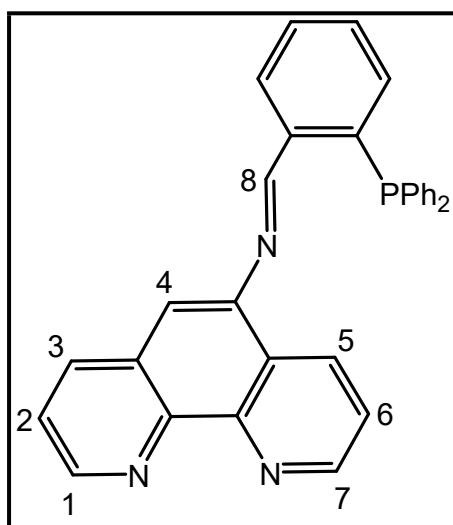



## Spectroscopic data.

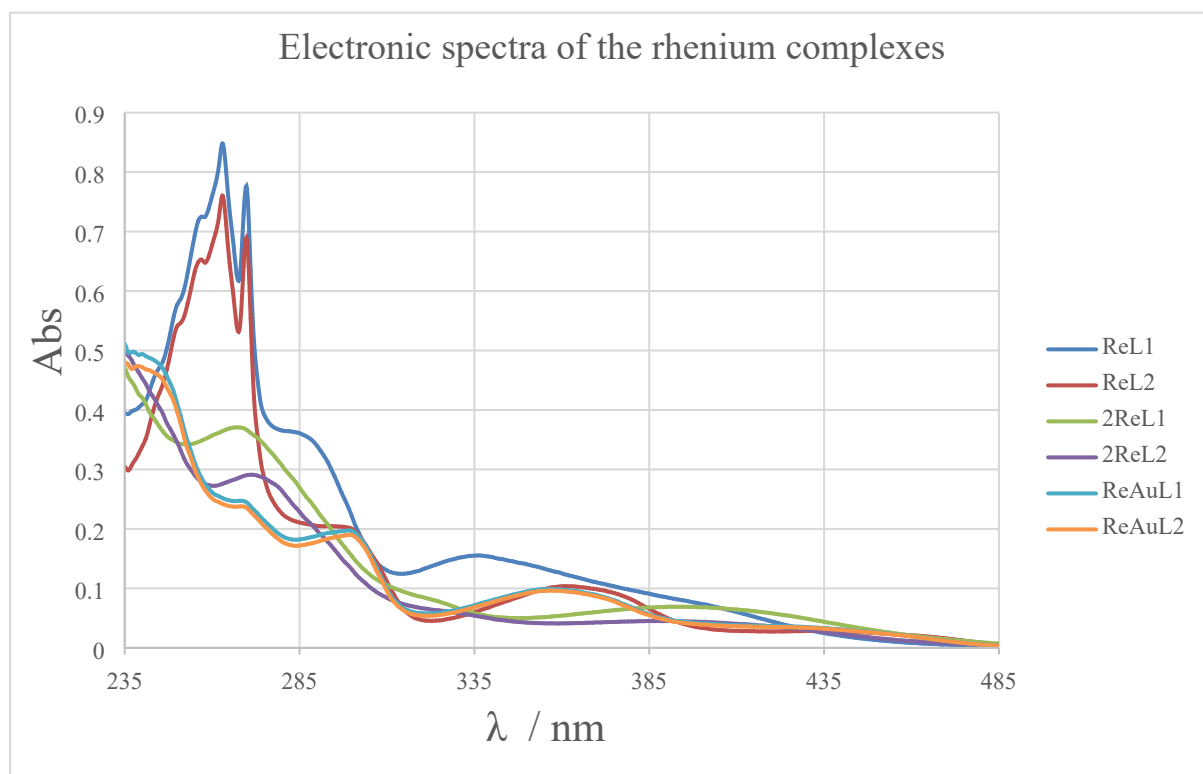

**Figure S114.** Electronic spectra of the rhenium complexes recorded as  $1 \times 10^{-5}$  M solutions in  $\text{CH}_2\text{Cl}_2$ .

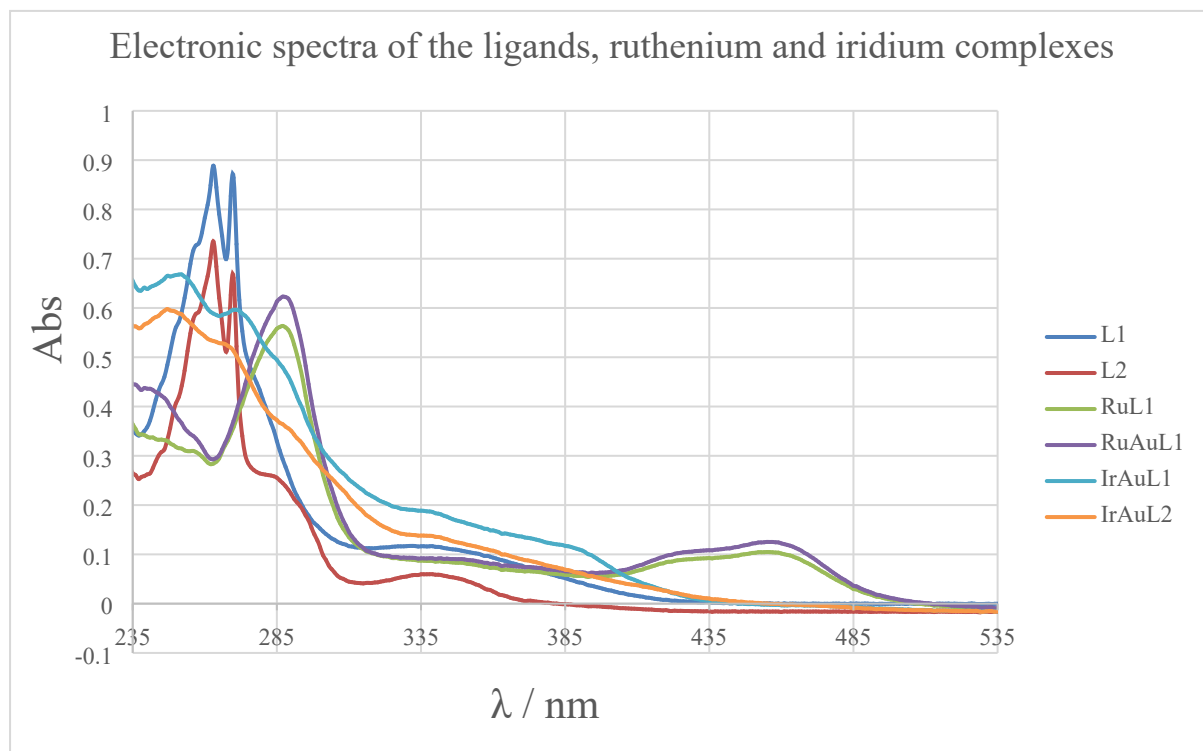

**Figure S115.** Electronic spectra of the ligands, ruthenium and iridium complexes recorded as  $1 \times 10^{-5}$  M solutions in  $\text{CH}_2\text{Cl}_2$ .

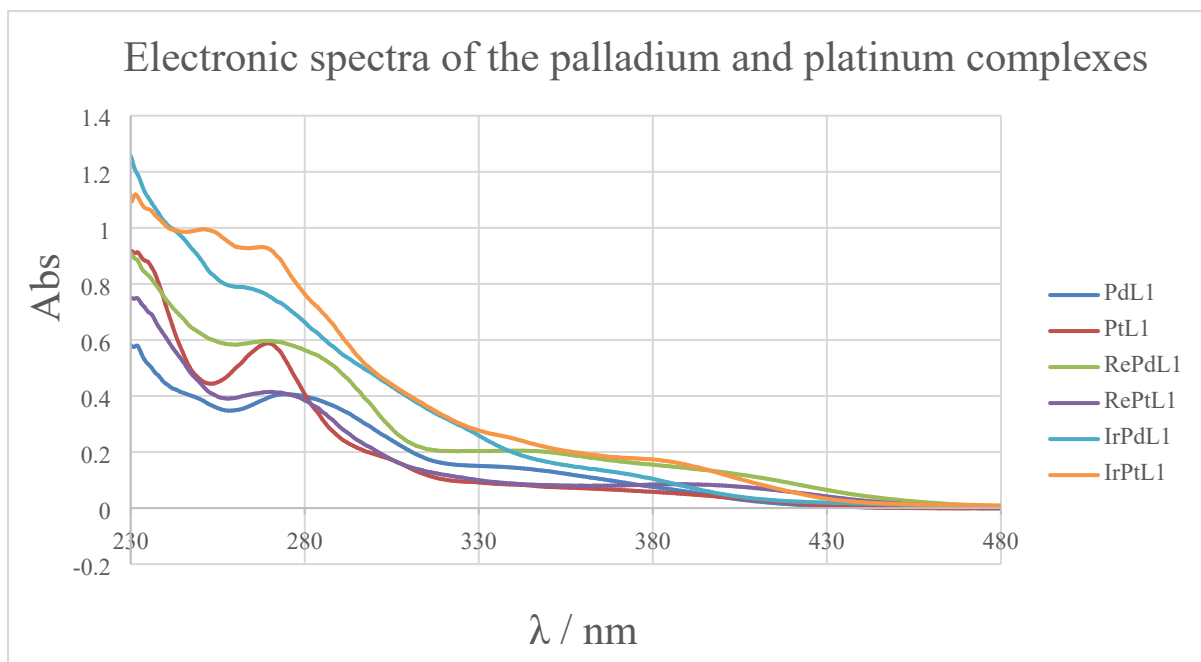

**Figure S116.** Electronic spectra of the palladium and platinum complexes recorded as  $1 \times 10^{-5}$  M solutions in  $\text{CH}_2\text{Cl}_2$ .

## Crystallographic data

| Compound (Identification code)                   | <b>2ReL1</b>                  | <b>2ReL2</b>                    |
|--------------------------------------------------|-------------------------------|---------------------------------|
| CCDC reference                                   |                               |                                 |
| Empirical formula                                | $C_{39}H_{26}Cl_6N_3O_6PRE_2$ | $C_{43.5}H_{38}Cl_2N_3O_8PRE_2$ |
| Formula weight                                   | 1248.70                       | 1205.04                         |
| Temperature /K                                   | 293(2)                        | 200(2)                          |
| Wavelength /Å                                    | 1.54184                       | 1.54184                         |
| Crystal system                                   | Monoclinic                    | Triclinic                       |
| Space group                                      | P 2 <sub>1</sub> /c           | P -1                            |
| a/Å                                              | 15.8776(2)                    | 11.0207(6)                      |
| b/Å                                              | 14.0772(6)                    | 11.2629(5)                      |
| c/Å                                              | 19.3595(3)                    | 20.4684(9)                      |
| α/°                                              | 90                            | 87.135(4)                       |
| β/°                                              | 101.2970(10)                  | 84.370(4)                       |
| γ/°                                              | 90                            | 63.675(4)                       |
| Volume/Å <sup>3</sup>                            | 4243.25(11)                   | 2266.1(2)                       |
| Z                                                | 4                             | 2                               |
| Density (calculated)/ Mgm <sup>-3</sup>          | 1.955                         | 1.766                           |
| Absorption coefficient/ mm <sup>-1</sup>         | 15.232                        | 12.148                          |
| SICrystal size/ mm <sup>3</sup>                  | 0.200x0.160x0.070             | 0.250x0.140x0.100               |
| Reflections collected                            | 8357                          | 8777                            |
| Independent reflections                          | 7286                          | 6841                            |
| R(int)                                           | 0.0336                        | 0.0393                          |
| Data / restraints / parameters                   | 8357 / 0 / 514                | 8777 / 1070 / 686               |
| Goodness-of-fit on F <sup>2</sup>                | 1.020                         | 1.076                           |
| R1, wR2 [I>2σ(I)]                                | 0.0304, 0.0750                | 0.0391, 0.0971                  |
| R1, wR2 (all data)                               | 0.0369, 0.0794                | 0.0570, 0.1117                  |
| Largest diff. peak and hole<br>e.Å <sup>-3</sup> | 2.066 and -1.381              | 1.569 and -1.330                |

**Table S2.** Crystal data and structure refinement for **2ReL1** and **2ReL2**.

| Compound (Identification code)                   | <b>ReAuL2</b>                                                                        | <b>AuL1</b>                                          |
|--------------------------------------------------|--------------------------------------------------------------------------------------|------------------------------------------------------|
| CCDC reference                                   |                                                                                      |                                                      |
| Empirical formula                                | C <sub>37</sub> H <sub>27</sub> AuCl <sub>11</sub> N <sub>3</sub> O <sub>3</sub> PRE | C <sub>31</sub> H <sub>22</sub> AuClN <sub>3</sub> P |
| Formula weight                                   | 1365.70                                                                              | 699.90                                               |
| Temperature /K                                   | 200(2)                                                                               | 200(2)                                               |
| Wavelength /Å                                    | 0.71073                                                                              | 0.71073                                              |
| Crystal system                                   | Triclinic                                                                            | Triclinic                                            |
| Space group                                      | P -1                                                                                 | P -1                                                 |
| a/Å                                              | 10.9443(3)                                                                           | 9.7321(2)                                            |
| b/Å                                              | 13.9344(4)                                                                           | 10.5512(3)                                           |
| c/Å                                              | 16.9978(5)                                                                           | 14.1403(3)                                           |
| α/°                                              | 74.830(2)                                                                            | 92.362(2)                                            |
| β/°                                              | 78.584(2)                                                                            | 100.776(2)                                           |
| γ/°                                              | 67.004(2)                                                                            | 112.287(3)                                           |
| Volume/Å <sup>3</sup>                            | 2289.66(12)                                                                          | 1309.76(6)                                           |
| Z                                                | 2                                                                                    | 2                                                    |
| Density (calculated)/ Mgm <sup>-3</sup>          | 1.981                                                                                | 1.775                                                |
| Absorption coefficient/ mm <sup>-1</sup>         | 6.557                                                                                | 5.805                                                |
| S1Crystal size/ mm <sup>3</sup>                  | 0.370x0.310x0.170                                                                    | 0.200x0.150x0.060                                    |
| Reflections collected                            | 11346                                                                                | 6479                                                 |
| Independent reflections                          | 9144                                                                                 | 5652                                                 |
| R(int)                                           | 0.0447                                                                               | 0.0424                                               |
| Data / restraints / parameters                   | 11346 / 487 / 626                                                                    | 6479 / 0 / 334                                       |
| Goodness-of-fit on F <sup>2</sup>                | 1.060                                                                                | 1.081                                                |
| R1, wR2 [I>2σ(I)]                                | 0.0399, 0.0995                                                                       | 0.0329, 0.0635                                       |
| R1, wR2 (all data)                               | 0.0543, 0.1109                                                                       | 0.0437, 0.0681                                       |
| Largest diff. peak and hole<br>e.Å <sup>-3</sup> | 1.759 and -1.505                                                                     | 1.319 and -1.161                                     |

**Table S3.** Crystal data and structure refinement for **ReAuL2** and **AuL1**.

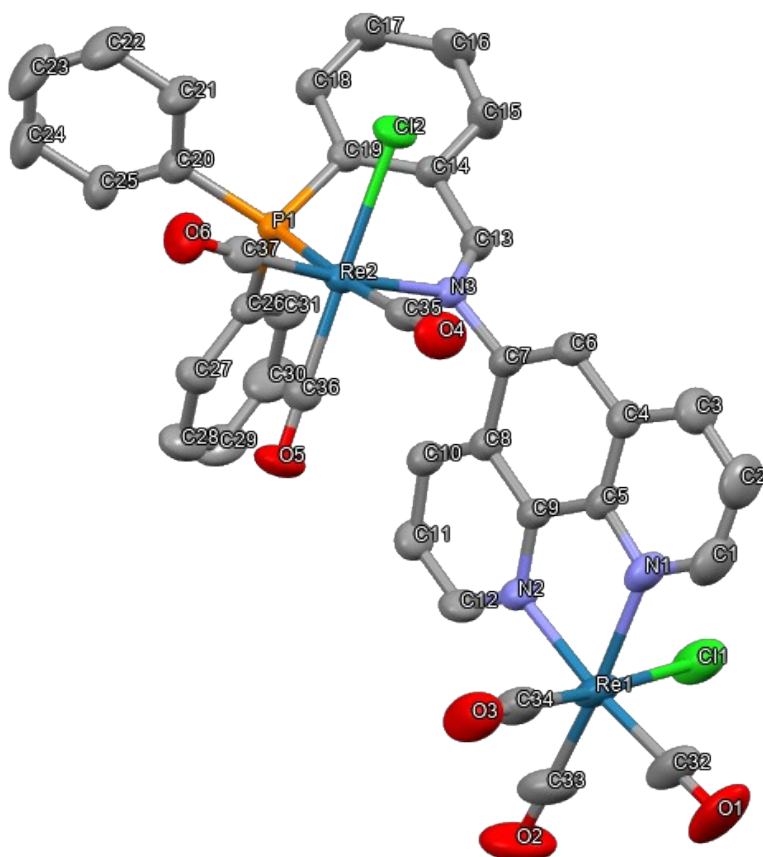

**Figure S117.** Molecular structure of **2ReL1**. Hydrogen atoms and residual solvent have been omitted for clarity. Selected bond lengths (Å) and angles (°): Re1-N1 2.176(4); Re1-N2 2.177(4); Re1-C32 1.916(6); Re1-C33 1.918(7); Re1-C23 1.939(6); Re1-Cl1 2.4734(14); Re2-N3 2.212(4); Re2-P1 2.4335(10); Re2-C35 1.968(5); Re2-C36 1.909(5); Re2-C37 1.933(5); Re2-Cl2 2.4868(10); N1-Re1-C33 171.9(2); N2-Re1-C32 174.1(2); Cl1-Re1-C34 176.02(18); N3-Re2-C37 173.61(16); P1-Re2-C35 174.73(14); Cl2-Re2-C36 177.27(14).

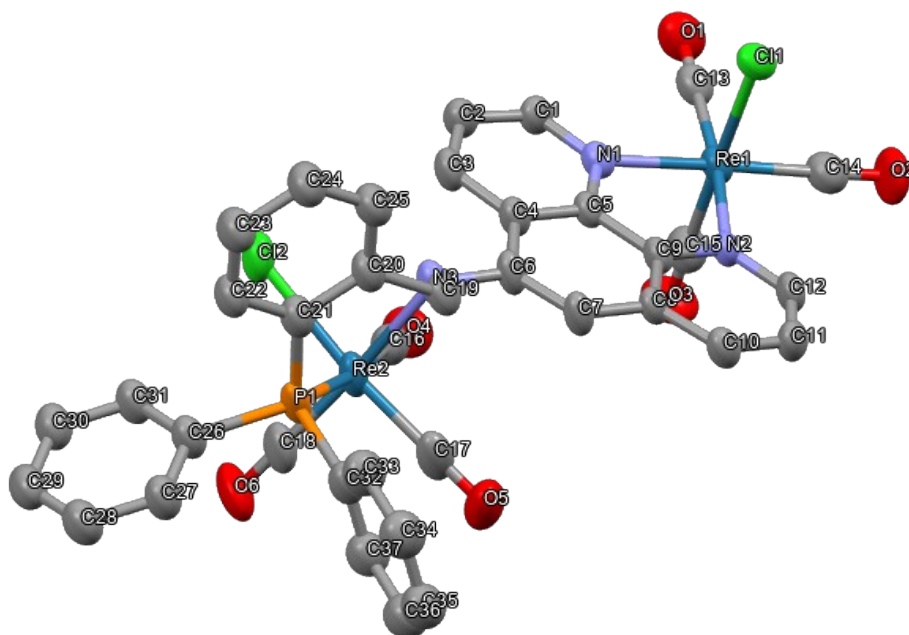

**Figure S118.** Molecular structure of **2ReL2**. Hydrogen atoms and residual solvent have been omitted for clarity. Selected bond lengths (Å) and angles (°): Re1–N1 2.190(5); Re1–N2 2.182(5); Re1–C13 1.925(7); Re1–C14 1.941(8); Re1–C15 1.917(9); Re1–Cl1 2.4779(16); Re2–N3 2.315(6); Re2–P1 2.491(2); Re2–C16 1.967(8); Re2–C17 1.902(9); Re2–C18 1.901(8); Re2–Cl2 2.4886(18); N2–Re1–C13 171.8(2); N1–Re1–C14 173.8(3); Cl1–Re1–C15 176.7(2); N3–Re2–C18 174.7(2); P1–Re2–C16 171.1(3); Cl2–Re2–C17 174.0(2).

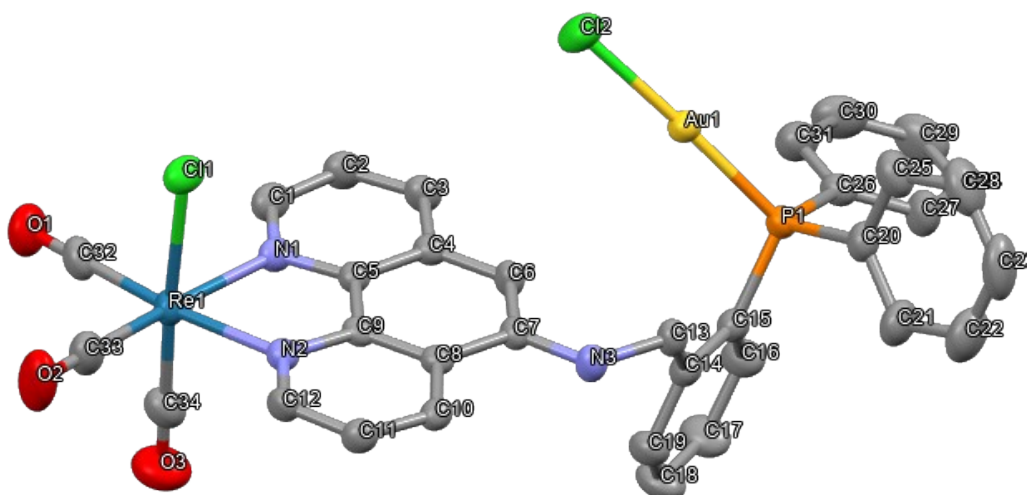

**Figure S119.** Molecular structure of **ReAuL2**. Hydrogen atoms and residual solvent have been omitted for clarity. Selected bond lengths (Å) and angles (°): Re1–N1 2.165(5); Re1–N2 2.191(5); Re1–C32 1.928(7); Re1–C33 1.913(7); Re1–C34 1.904(7); Re1–Cl1 2.4785(15); Au1–P1 2.2364(15); Au1–Cl2 2.2866(16); N1–Re1–C33 171.6(2); N2–Re1–C32 172.7(2); Cl1–Re1–C34 176.5(2); P1–Au1–Cl1 177.42(6).

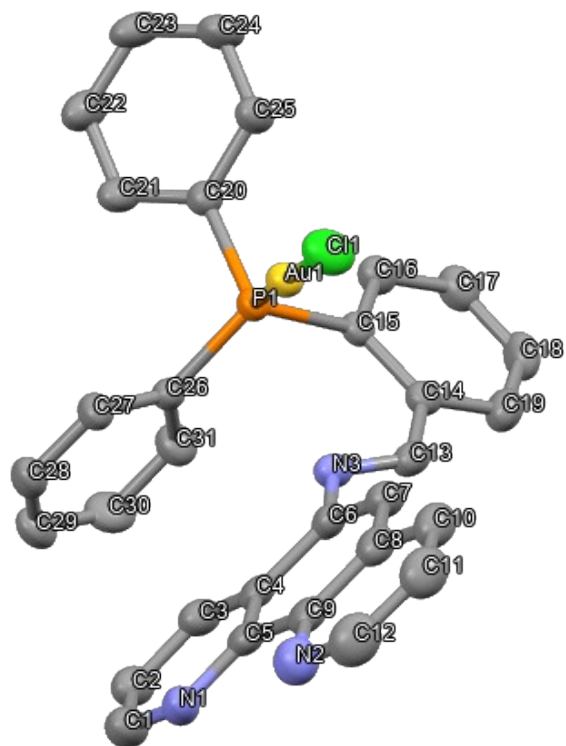

**Figure S120.** Molecular structure of **AuL1**. Hydrogen atoms and residual solvent have been omitted for clarity. Selected bond lengths (Å) and angles (°): Au1-P1 2.2300(10); Au1-Cl1 2.2810(11); P1-Au1-Cl1 175.80(4).

## Calculations

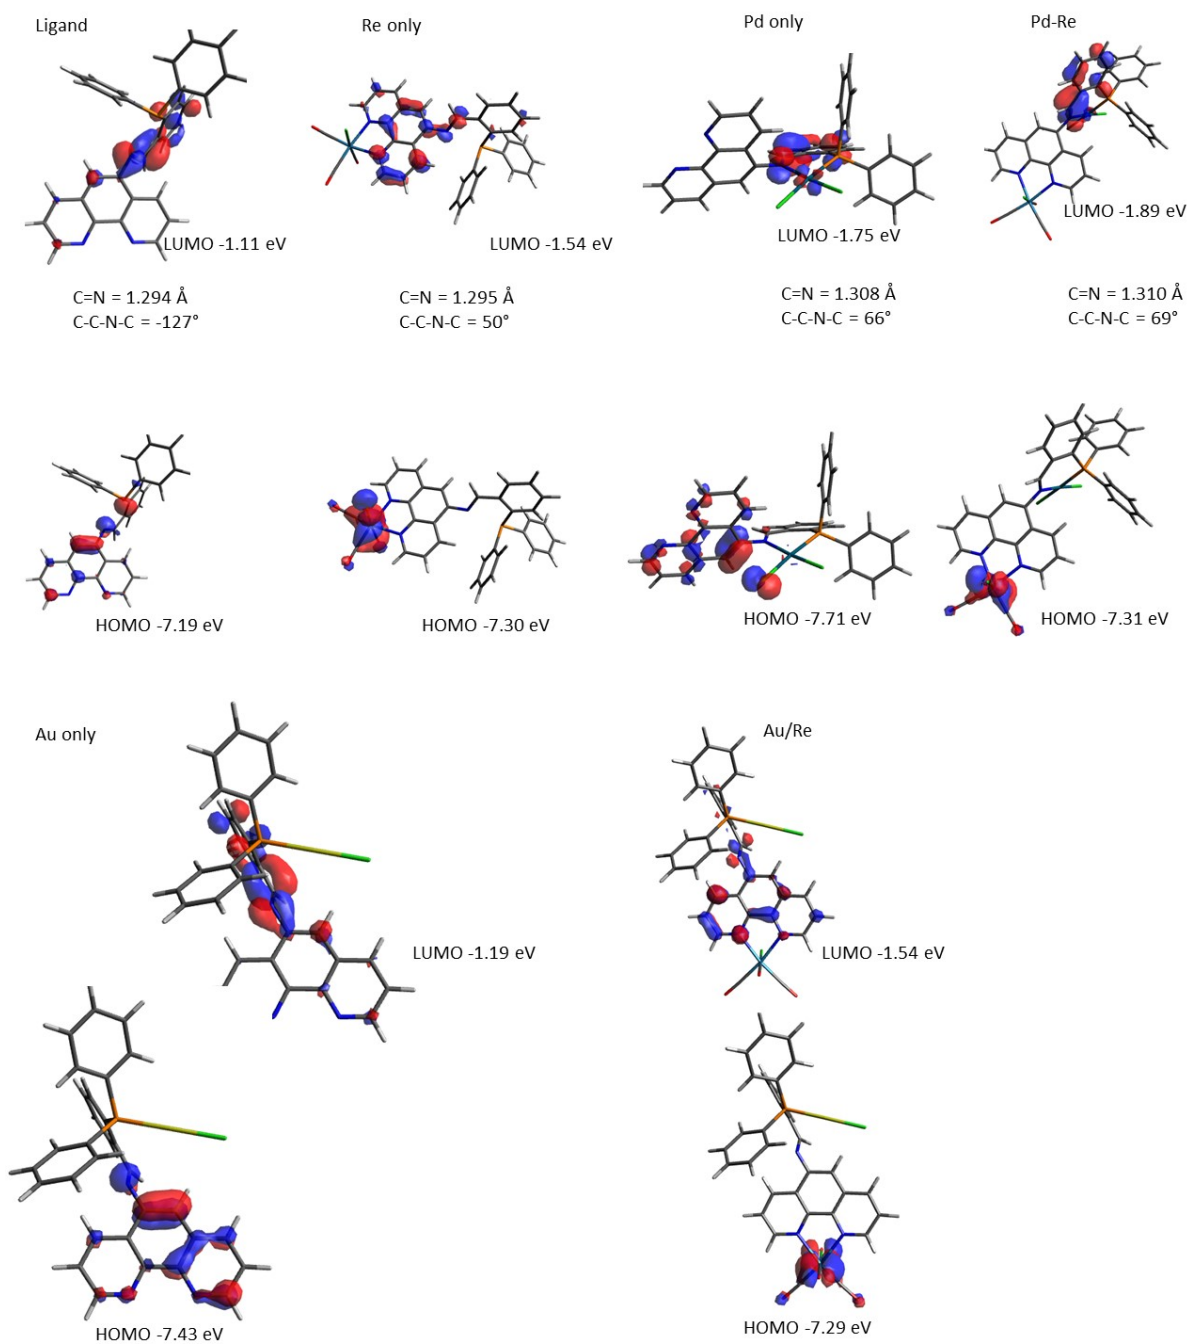

**Figure S121.** Calculated MOs for L1 and selected complexes.



Absorption in CH<sub>2</sub>Cl<sub>2</sub>  
(CAM-B3LYP/def2svp)

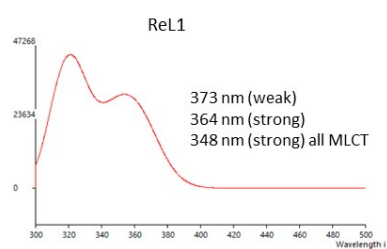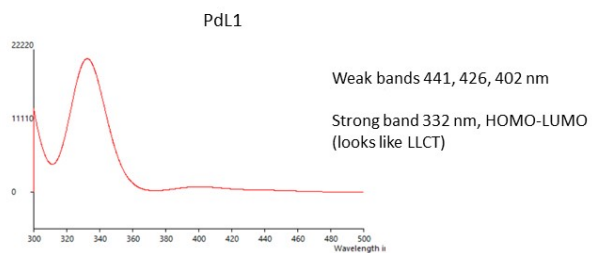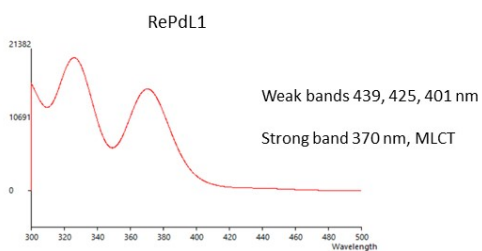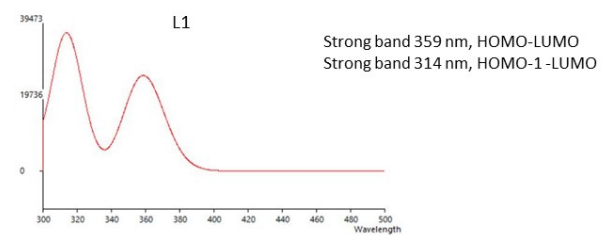

Absorption in CH<sub>2</sub>Cl<sub>2</sub>  
(CAM-B3LYP/def2svp)

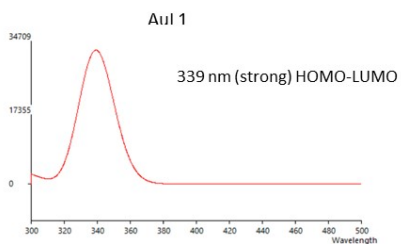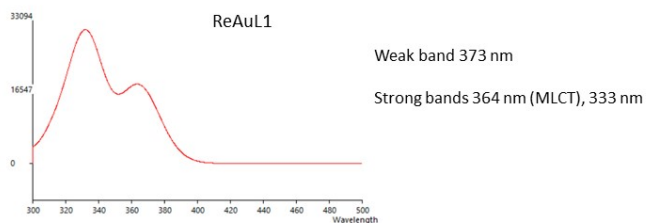

**Figure S122.** Calculated absorption spectra for **L1** and selected complexes.
